# Supplementary material for: Sero-epidemiological evaluation of malaria transmission in The Gambia before and after mass drug administration
Source: BMC Med. 2020 Nov 13;18:331. doi: 10.1186/s12916-020-01785-6 (PMC7664049; doi:10.1186/s12916-020-01785-6)
Supplement: Supplementary file 2 — Additional file 2. Dataset. [file 12916_2020_1785_MOESM2_ESM.csv]

sample_id	participant_id	Etramp5.Ag1	GEXP18	HSP40.Ag1	Rh2.2030	EBA175	PfMSP1.19	PfAMA1	PfGLURP.R2	GST	visit_date	year_month	visit_type	fever	rdt	pcr	age_group	temp	region	bednet	cluster
1	1	41.89142549	143.0262081	90.83316351	90.32254554	23.50982285	31.67999304	29.92085424	21.07651946	55	19/06/2013	2013-06	Monthly	0	NA	0	1-15 years	36.6	1	1	NA
2	1	79.67584848	312.182546	188.8166807	158.6535148	31.34643047	53.31511024	39.70267197	26.57474193	101	20/07/2013	2013-07	Monthly	0	NA	0	1-15 years	37	1	1	R1_Jul_2013
3	1	83.78285098	310.3460197	179.9063905	153.9410341	29.38727857	54.86047575	37.4010678	24.74200111	102	17/08/2013	2013-08	Monthly	0	NA	NA	1-15 years	36.5	1	1	NA
4	1	76.39024648	343.8574271	195.0526174	230.9115512	31.34643047	95.4263205	33.3732605	22.90926028	105.5	17/09/2013	2013-09	Monthly	0	NA	0	1-15 years	36.3	1	1	NA
5	1	19744.11396	587.83631	187.0347832	398.9900272	115.5899624	12194.15545	93.21496898	8109.072172	100	21/10/2013	2013-10	Monthly	0	NA	0	1-15 years	36.3	1	1	NA
6	1	4889.875221	351.6595743	106.5975968	184.5721583	50.93794951	8455.333351	194.4855526	2183.211226	62	18/11/2013	2013-11	Monthly	0	NA	0	1-15 years	36	1	1	NA
7	1	67.35484098	400.7449417	311.8585085	1804.410808	258.6080514	2805.611091	3868.156323	1741.286935	143.5	11/12/2013	2013-12	Monthly	0	NA	0	1-15 years	36.6	1	1	R1_Dec_2013
8	1	11832.94499	208.4096176	112.6030953	106.8162278	29.38727857	81.13168949	32.22245841	279.4929755	79	12/10/2013	2013-10	PCD	1	1	0	1-15 years	39	1	1	NA
9	2	2423.140132	1673.235331	442.8469799	1751.297585	2177.964648	2137.116396	10064.04267	13548.93032	196.5	11/12/2013	2013-12	Monthly	0	NA	0	>15 years	35.8	1	1	R1_Dec_2013
10	3	129	547.2199276	416.1306176	121	51	3047	1197.5	917.5	168.5	12/12/2013	2013-12	Monthly	0	NA	0	1-15 years	35.7	1	1	R1_Dec_2013
11	4	53	139.5	75	56	74	73	158	24	88.5	11/12/2013	2013-12	Monthly	0	NA	0	>15 years	35.3	1	1	R1_Dec_2013
12	3	178.2464466	413.0613702	533.4192563	204.1542537	37	327.2897277	80.34865359	69.66644173	430	18/07/2013	2013-07	Monthly	0	NA	0	1-15 years	36.5	1	1	R1_Jul_2013
13	4	56.28835157	115	74	106.9379424	120	89.74073178	407.2573912	38.15067047	82	20/07/2013	2013-07	Monthly	0	NA	0	>15 years	37	1	1	R1_Jul_2013
14	5	267.875642	453.9270257	338.8417379	131	22	1282	46	59	218	20/06/2013	2013-06	Monthly	0	NA	1	1-15 years	35.8	1	1	NA
15	5	371.1740921	720.4916697	607.1403098	242	26	1782.5	50	70	395	18/07/2013	2013-07	Monthly	0	NA	0	1-15 years	36.1	1	1	R1_Jul_2013
16	5	210.0985427	461.5261358	351.423106	113	16	1133.5	36	43	217.5	18/08/2013	2013-08	Monthly	0	NA	0	1-15 years	36.6	1	1	NA
17	5	213.6001851	401.4540839	338.8417379	121	17	1096	43	54	208	18/09/2013	2013-09	Monthly	0	NA	0	1-15 years	36.2	1	1	NA
18	5	184.7116355	394.6048282	323.8914683	118.5	16	1042	35	44	192	21/10/2013	2013-10	Monthly	0	NA	0	1-15 years	36.9	1	1	NA
19	5	229.3575758	170	275.0342627	91	17	783.5	35	50	154	12/12/2013	2013-12	Monthly	0	NA	NA	1-15 years	36.6	1	1	R1_Dec_2013
20	6	166	183.5	102.0799332	98	53.80038135	2865	1503	11074.53175	54	20/06/2013	2013-06	Monthly	0	NA	0	>15 years	36.8	1	1	NA
21	6	151.5	183	110.5865942	85	57.06101052	2872.5	1397	8361.247583	59.5	18/07/2013	2013-07	Monthly	0	NA	0	>15 years	37.3	1	1	R1_Jul_2013
22	6	179	354.9329558	125.8985842	91.5	61.95195428	2658.5	1291.5	8934.34241	73.5	18/08/2013	2013-08	Monthly	1	2	0	>15 years	36.5	1	1	NA
23	6	163	187.5	101.229267	85	57.06101052	2367.5	1330	8912.546849	50	18/09/2013	2013-09	Monthly	0	NA	0	>15 years	35.6	1	1	NA
24	6	131	173	113.9892587	78	44.01849383	1966	1163	5412.875196	64	21/10/2013	2013-10	Monthly	0	NA	0	>15 years	36.4	1	1	NA
25	7	457.1214027	382.4055164	2.904287173	234.3863238	10.74471383	230.3836739	1293.546475	5107.059904	176	12/12/2013	2013-12	Monthly	0	NA	NA	>15 years	36.2	1	1	R1_Dec_2013
26	6	1623.638841	1364.374666	539.1724986	733.7043742	1041.203893	7906.264017	3303.156567	23638.21832	236.5	12/12/2013	2013-12	Monthly	0	NA	NA	>15 years	36.4	1	1	R1_Dec_2013
27	8	3339.987931	966.4799911	634.5214743	9738.208974	12183.10836	19619.03147	18689.28095	16449.66936	435	12/12/2013	2013-12	Monthly	0	NA	NA	>15 years	36.4	1	1	R1_Dec_2013
28	9	123.0127363	143.0836811	8.889621596	71.35896751	25.56450287	118.456383	52.508652	36.70004111	198	12/12/2013	2013-12	Monthly	0	NA	NA	1-15 years	35.9	1	1	R1_Dec_2013
29	10	189.3282443	142.3703288	13.33179299	63.00161095	16.79953045	1448.525691	57.92621133	33.2047991	114	12/12/2013	2013-12	Monthly	0	NA	NA	1-15 years	36.1	1	1	R1_Dec_2013
30	11	802.3670248	488.5362426	479.342552	2288.358543	830.6871265	437.4491622	1411.065839	3720.239349	981	12/12/2013	2013-12	Monthly	0	NA	NA	>15 years	36.3	1	1	R1_Dec_2013
31	12	232.1534572	768.607788	256.7135609	2959.244598	351.4105719	2473.617518	23239.17768	17642.16786	202	12/12/2013	2013-12	Monthly	0	NA	0	1-15 years	36.3	1	1	R1_Dec_2013
32	13	47	1122.916507	104.1965105	58.90514666	34.66172033	55	33	52.6900649	88	12/12/2013	2013-12	Monthly	0	NA	0	1-15 years	35.8	1	1	R1_Dec_2013
33	14	1049	773.154312	380.4468788	1634.599772	67.0126593	23979.42165	13604.53596	11380.03166	89	12/12/2013	2013-12	Monthly	0	NA	0	1-15 years	36.1	1	1	R1_Dec_2013
34	15	53	426.7810917	8.649417496	72.21295771	24.72480226	189.1597917	1909.143507	67	84	13/12/2013	2013-12	Monthly	0	NA	0	1-15 years	37.1	1	1	R1_Dec_2013
35	8	445.4229734	409.7628505	245.4849112	1748.762356	3413.171814	3494.746311	13908.12698	4699.636568	196.5	18/07/2013	2013-07	Monthly	0	NA	0	>15 years	36.5	1	1	R1_Jul_2013
36	13	375.2298589	990.3904307	99.03656146	160.172144	46.46629631	99.18992251	166.1241638	64	122	18/07/2013	2013-07	Monthly	0	NA	0	1-15 years	35.3	1	1	R1_Jul_2013
37	10	431.5576668	438.8274811	172.2032448	309.8568263	58.08287039	5761.168102	235.3425654	59	161	18/07/2013	2013-07	Monthly	0	NA	0	1-15 years	36	1	1	R1_Jul_2013
38	11	233.8934725	387.8066541	417.7969117	704.434675	96.5	264.7305695	543.7576659	463	441	18/07/2013	2013-07	Monthly	0	NA	0	>15 years	36.3	1	1	R1_Jul_2013
39	15	239.301414	632.8982945	274.5822629	177.5	427.6499616	625.1144237	3007.605555	223	184	18/07/2013	2013-07	Monthly	0	NA	0	1-15 years	36.4	1	1	R1_Jul_2013
40	7	677.3446804	725.9455244	280.6636118	1297.901738	562.2455545	540.9125886	3449.663691	11558.09184	182	18/07/2013	2013-07	Monthly	0	NA	0	>15 years	36.3	1	1	R1_Jul_2013
41	12	77.06316723	697.3253797	200.8968823	1647.419449	72	498.4748637	14274.2956	726	139	18/07/2013	2013-07	Monthly	0	NA	0	1-15 years	35.8	1	1	R1_Jul_2013
42	9	81.30539671	153	85	112.7709211	21	80.50271527	56.71669665	43.12684488	89	18/07/2013	2013-07	Monthly	0	NA	0	1-15 years	36	1	1	R1_Jul_2013
43	16	26.28481599	99.43726852	79.57285399	381.7109316	121.4674181	800.8856777	1133.540055	43.98577975	35	20/06/2013	2013-06	Monthly	0	NA	0	1-15 years	36.8	1	1	NA
44	16	55.85523399	342.4804944	779.8703103	391.1358928	186.1194309	1070.938301	12439.8979	404.1193514	184	18/07/2013	2013-07	Monthly	0	NA	0	1-15 years	36.6	1	1	R1_Jul_2013
45	16	29.15971774	113.0588122	99.84141113	355.0068746	116.5695383	725.5491089	1111.099414	47.65126139	59	18/08/2013	2013-08	Monthly	0	NA	0	1-15 years	36.9	1	1	NA
46	16	29.57041799	128.0425102	94.58660002	322.0195102	107.7533547	680.733509	1092.686581	44.90215016	53	18/09/2013	2013-09	Monthly	0	NA	0	1-15 years	36.6	1	1	NA
47	16	1684.416915	969.5665299	797.3527424	2191.643262	1602.496302	16810.51217	10236.46199	630.0046578	70	22/10/2013	2013-10	Monthly	0	NA	0	1-15 years	37	1	1	NA
48	16	887.7256597	629.3839651	788.612545	2654.767487	1168.791471	12755.61482	11397.06021	466.4325394	115.5	19/11/2013	2013-11	Monthly	0	NA	0	1-15 years	36.3	1	1	NA
49	16	320.3461949	338.8085571	410.5980068	1658.995343	595.5231304	5451.276851	6716.30204	185.1068231	72.5	12/12/2013	2013-12	Monthly	0	NA	0	1-15 years	35.8	1	1	R1_Dec_2013
50	16	1436.054406	343.8574271	185.698305	173.5763701	237.0573804	6755.203564	2126.60711	143.8701546	93	10/10/2013	2013-10	PCD	1	1	1	1-15 years	38.3	1	1	NA
51	17	197.8427944	437.9641895	370.2805702	126.5	22	253	39	55	233	20/06/2013	2013-06	Monthly	0	NA	0	1-15 years	36.3	1	1	NA
52	17	138.314874	151	299.4764079	88	18	149	34	40	178	18/07/2013	2013-07	Monthly	1	2	0	1-15 years	38.3	1	1	R1_Jul_2013
53	17	176.8329401	377.8574675	367.1388906	113	21	196	44	49	230	18/08/2013	2013-08	Monthly	0	NA	0	1-15 years	36.3	1	1	NA
54	17	155.8230858	163	319.955427	88	18	159.5	37	39	199	18/09/2013	2013-09	Monthly	0	NA	0	1-15 years	36.5	1	1	NA
55	17	133.0624104	379.3802312	335.6951991	87	16	176.5	35	40	194.5	21/10/2013	2013-10	Monthly	0	NA	0	1-15 years	36	1	1	NA
56	17	116.4296091	134	266.3549137	78	17	121	34	34	152	14/12/2013	2013-12	Monthly	0	NA	0	1-15 years	36.3	1	1	R1_Dec_2013
57	18	26.74798384	75.26807145	49.29657013	30.04306357	7.791324612	309.0125059	340.424998	10.72147821	38	20/06/2013	2013-06	Monthly	0	NA	0	>15 years	36	1	1	NA
58	18	40.88620387	121.8625919	120.9898039	46.481721	12.46611938	108.7386444	22.18655791	13.27421112	144	18/07/2013	2013-07	Monthly	1	2	0	>15 years	36	1	1	R1_Jul_2013
59	18	61.90247688	181.2426841	164.337047	75.95793431	16.36178169	174.631017	31.893177	18.89022352	214	18/08/2013	2013-08	Monthly	0	NA	0	>15 years	36.2	1	1	NA
60	18	54.26019578	152.3282398	136.8247233	59.23585176	14.80351676	134.056896	24.95987765	13.7847577	166	18/09/2013	2013-09	Monthly	0	NA	0	>15 years	36	1	1	NA
61	18	49.67482713	146.951949	132.6572421	58.38557637	17.14091415	131.4601522	33.27983687	20.42186327	168	22/10/2013	2013-10	Monthly	0	NA	0	>15 years	35.8	1	1	NA
62	18	56.55288011	159.4966276	161.0015874	61.50325278	14.80351676	135.0306749	29.11985726	15.82694403	208	19/11/2013	2013-11	Monthly	0	NA	0	>15 years	36	1	1	NA
63	18	56.55288011	171.1452577	145.9941672	64.90435432	21.03657645	401.8460949	58.93304446	53.60739107	184	12/12/2013	2013-12	Monthly	0	NA	NA	>15 years	35.6	1	1	R1_Dec_2013
64	19	24	126	86.76794318	29	21.19408962	33	19	17	44	20/06/2013	2013-06	Monthly	0	NA	1	1-15 years	36.8	1	1	NA
65	19	22	105	81.66394652	24	21.19408962	25	20	18	41	18/07/2013	2013-07	Monthly	0	NA	0	1-15 years	36.6	1	1	R1_Jul_2013
66	19	21	82	74.85861764	23	17.93346045	25	18	17	35	18/08/2013	2013-08	Monthly	0	NA	0	1-15 years	36.3	1	1	NA
67	19	26	96	90.17060762	28	21.19408962	29	22	19	54	18/09/2013	2013-09	Monthly	0	NA	0	1-15 years	36.6	1	1	NA
68	19	23	99.5	91.87193984	27	19.56377503	26	22	19.5	50	21/10/2013	2013-10	Monthly	0	NA	0	1-15 years	36.9	1	1	NA
69	19	22	91	78.26128208	25	19.56377503	25	19	17	41	14/12/2013	2013-12	Monthly	0	NA	0	1-15 years	36.7	1	1	R1_Dec_2013
70	20	219.7017595	577.0343131	140.8200728	5308.984467	1195.199508	7545.764867	18904.97179	1904.84313	277.5	12/12/2013	2013-12	Monthly	0	NA	NA	>15 years	35	1	1	R1_Dec_2013
71	21	107.3197535	400.2488074	184.6822747	82.44294363	27.0253316	337.6473278	2336.615178	835.3628405	279.5	12/12/2013	2013-12	Monthly	0	NA	NA	>15 years	35.4	1	1	R1_Dec_2013
72	22	108.8434607	235.6851235	880.9753475	234.7697665	176.5794416	1290.849502	13891.40396	308.6891785	235	14/12/2013	2013-12	Monthly	0	NA	0	>15 years	36.6	1	1	R1_Dec_2013
73	23	68	366.9274087	93.95603383	70.68617599	34.08402499	104	30	48.92648883	132	14/12/2013	2013-12	Monthly	0	NA	0	1-15 years	35.6	1	1	R1_Dec_2013
74	24	38	455.496908	82.74428776	41.23360266	33.50632965	42	24	43.28112474	59	13/12/2013	2013-12	Monthly	0	NA	0	1-15 years	36.4	1	0	R1_Dec_2013
75	23	64.21930603	271.8629293	177.1138724	625.6918336	90	1859.176519	2753.4791	69	83	18/07/2013	2013-07	Monthly	0	NA	1	1-15 years	36	1	1	R1_Jul_2013
76	22	260.9331803	786.7336046	408.1015929	8291.470298	1949.452963	12956.66766	22759.85084	3654.954231	260	18/07/2013	2013-07	Monthly	0	NA	0	>15 years	36.3	1	1	R1_Jul_2013
77	20	136.5505244	346.4741201	212.4783179	97	18	216.2303125	64.54096924	28	120	18/07/2013	2013-07	Monthly	0	NA	0	>15 years	36	1	1	R1_Jul_2013
78	25	120.3945297	609.8174302	254.3438492	803.5815576	49	220.3926795	2819.716385	2373.611154	136	18/07/2013	2013-07	Monthly	0	NA	0	>15 years	36.2	1	1	R1_Jul_2013
79	21	61	572.3502367	369.2066059	241	26	412.1042048	3262.93602	959	175	18/07/2013	2013-07	Monthly	0	NA	0	>15 years	36.5	1	1	R1_Jul_2013
80	24	100	2633.410225	240.7810759	109	21.5	213.7549847	45	35	157	18/07/2013	2013-07	Monthly	0	NA	0	1-15 years	35.4	1	0	R1_Jul_2013
81	26	47.3821428	188.0717775	121.823118	37.4121169	20.25744399	57.12836244	18.0265783	10.72147821	100	20/06/2013	2013-06	Monthly	1	2	0	1-15 years	35.8	1	1	NA
82	26	50.43905524	287.1655055	133.4907158	49.31597228	28.0487686	76.60394054	24.95987765	15.82694403	138.5	18/07/2013	2013-07	Monthly	0	NA	0	1-15 years	35.5	1	1	R1_Jul_2013
83	26	42.79677414	182.0962899	95.16285816	33.44416511	30.38616599	51.93487495	18.0265783	11.74257138	92	18/08/2013	2013-08	Monthly	0	NA	0	1-15 years	35.7	1	1	NA
84	26	35.15449304	162.465519	81.19435079	33.44416511	14.80351676	44.79382964	16.63991844	10.72147821	84.5	18/09/2013	2013-09	Monthly	0	NA	0	1-15 years	36.5	1	1	NA
85	26	48.14637091	368.4402771	119.3232103	51.01652305	17.92004661	77.25312648	22.18655791	12.76366454	119	22/10/2013	2013-10	Monthly	1	0	0	1-15 years	36.3	1	1	NA
86	26	70.30898609	534.2542854	132.6572421	49.31597228	22.59484137	77.90231242	22.87988785	14.29530429	135	19/11/2013	2013-11	Monthly	0	NA	0	1-15 years	35.3	1	1	NA
87	26	45.85368658	246.9980744	114.3237073	43.64746972	16.36178169	64.26940774	21.49322798	12.76366454	109	13/12/2013	2013-12	Monthly	0	NA	0	1-15 years	36.1	1	1	R1_Dec_2013
88	27	51.20328335	170.2492092	128.4900434	116.2043025	16.36178169	767.9869633	1526.895925	328.281452	133.5	20/06/2013	2013-06	Monthly	1	2	0	>15 years	36	1	1	NA
89	27	50.43905524	155.9124337	119.3232103	108.8352492	17.14091415	653.7302384	1178.65113	271.1002349	122	18/07/2013	2013-07	Monthly	0	NA	0	>15 years	36	1	1	R1_Jul_2013
90	27	68.01630176	206.000917	164.337047	10.34606853	20.64701022	873.155085	1651.312444	404.8634393	195	18/08/2013	2013-08	Monthly	0	NA	0	>15 years	36.2	1	1	NA
91	27	80.24395151	291.8676636	220.2320186	3.110358438	25.71137122	988.7101818	2388.303676	378.8255636	265	18/09/2013	2013-09	Monthly	0	NA	0	>15 years	36.6	1	1	NA
92	27	44.32523036	197.0358363	127.6566377	132.6429599	21.03657645	680.9960477	1060.295682	280.2900733	118	22/10/2013	2013-10	Monthly	0	NA	0	>15 years	36.9	1	1	NA
93	27	92.47160127	307.6867984	247.7821443	57.80188585	35.84009321	1319.79501	2920.158696	546.795389	301.5	19/11/2013	2013-11	Monthly	0	NA	0	>15 years	35.4	1	1	NA
94	27	70.30898609	262.3783325	182.685112	9.343866016	28.0487686	885.4896178	1633.137858	412.0110914	202.5	13/12/2013	2013-12	Monthly	0	NA	0	>15 years	36.2	1	1	R1_Dec_2013
95	28	77.56915313	111.1100102	79.26115197	47.61542151	16.36178169	117.5026546	284.9586032	6.938047625	67	20/06/2013	2013-06	Monthly	0	NA	0	>15 years	37	1	1	NA
96	28	114.2521024	203.4393592	151.8299655	109.6855245	26.49050368	245.7168771	385.4914438	62.5631979	144.5	18/07/2013	2013-07	Monthly	1	2	0	>15 years	37.2	1	1	R1_Jul_2013
97	28	166.6017279	227.3506539	184.3533693	117.9048533	26.49050368	278.1761739	444.7711532	254.3254502	191	18/08/2013	2013-08	Monthly	0	NA	0	>15 years	36.3	1	1	NA
98	28	116.9269008	193.1939736	155.1649486	99.19879481	20.25744399	223.6445552	413.2246411	159.5141433	148	18/09/2013	2013-09	Monthly	0	NA	0	>15 years	37.1	1	1	NA
99	28	95.5285137	171.426839	118.4899309	79.35903585	20.25744399	183.7196201	363.9982158	15.57554301	107.5	22/10/2013	2013-10	Monthly	0	NA	0	>15 years	36.7	1	1	NA
100	28	136.7968316	193.1939736	176.8465389	100.8993456	21.81570891	240.8479826	502.3175378	480.2124214	176	19/11/2013	2013-11	Monthly	0	NA	0	>15 years	36.2	1	1	NA
101	28	126.0976381	282.0363014	226.074871	6.750488172	21.81570891	342.1209887	375.7848247	69.47874001	220	14/12/2013	2013-12	Monthly	0	NA	0	>15 years	36.3	1	1	R1_Dec_2013
102	29	178.3259779	858.2822558	424.6440181	606.6948111	25	1265.747366	1810.512626	1646.925591	200	20/06/2013	2013-06	Monthly	0	NA	0	1-15 years	36.7	1	1	NA
103	29	561.5937512	2248.031468	1136.888027	1706.2858	63	2981.295759	3101.331183	2685.375429	691	18/07/2013	2013-07	Monthly	1	2	0	1-15 years	37.8	1	1	R1_Jul_2013
104	29	3864.544145	1000.973711	414.1165052	557.2569126	116	11417.49867	2719.481895	28171.73296	198	03/08/2013	2013-08	PCD	1	1	1	1-15 years	39.5	1	1	NA
105	29	13678.50544	10937.67041	4216.579903	15510.71533	1192.399219	22109.74947	22226.98417	35865.37169	579	18/08/2013	2013-08	Monthly	0	NA	0	1-15 years	36.3	1	1	NA
106	29	4616.473838	4675.507427	2465.873657	6805.971663	178	15024.51348	15074.96811	25627.02295	413	18/09/2013	2013-09	Monthly	0	NA	0	1-15 years	36.9	1	1	NA
107	29	1095.906289	1782.044889	1487.802023	2648.249759	48.5	6433.003374	7873.605318	10608.55516	259	22/10/2013	2013-10	Monthly	0	NA	0	1-15 years	36.9	1	1	NA
108	29	479.0847167	2099.097726	1571.748774	2392.147852	50	3459.588226	6460.277476	4416.738294	453	14/12/2013	2013-12	Monthly	0	NA	0	1-15 years	36.3	1	1	R1_Dec_2013
109	30	111	181.5	570.1633425	61	23	593	67	51	91.5	13/12/2013	2013-12	Monthly	0	NA	0	1-15 years	36.3	1	1	R1_Dec_2013
110	31	41	432.0218355	61	79	25	41	26	27	74	14/12/2013	2013-12	Monthly	0	NA	0	1-15 years	36.2	1	1	R1_Dec_2013
111	32	51	544.8759433	127.1810349	72.45333039	23.10781355	99.5	27	50.80827686	92	14/12/2013	2013-12	Monthly	0	NA	0	1-15 years	36.5	1	1	R1_Dec_2013
112	33	87	353.3638426	92.18339038	10736.23238	1820.905438	7085.5	17275.50831	7469.769243	97.5	13/12/2013	2013-12	Monthly	0	NA	0	>15 years	36.3	1	1	R1_Dec_2013
113	31	62.39387954	360.1384283	68.25031326	127.756353	27.10533952	54.35064247	57.3523899	33	66	18/07/2013	2013-07	Monthly	0	NA	0	1-15 years	35.7	1	1	R1_Jul_2013
114	32	254.1732533	945.0600563	594.3489935	747.7028621	38	947.1022411	77.44916309	40	402	18/07/2013	2013-07	Monthly	1	2	0	1-15 years	38.5	1	1	R1_Jul_2013
115	33	162.6107934	471.4315419	229.4870527	13267.92499	647.3294813	5961.16008	23923.18699	11016.57249	158	18/07/2013	2013-07	Monthly	0	NA	0	>15 years	36.3	1	1	R1_Jul_2013
116	34	134.4666176	182.5	189.4041824	324.7024797	57	435.5064925	7926.631974	3141.431563	94	18/07/2013	2013-07	Monthly	0	NA	0	1-15 years	36.3	1	1	R1_Jul_2013
117	30	158.7018801	449.5491418	247.4410203	225.5418422	23	248.106729	69.32040702	77.96006575	148	18/07/2013	2013-07	Monthly	0	NA	0	1-15 years	36.5	1	1	R1_Jul_2013
118	26	55	738.1223607	199.0367306	78	37	152.1319261	34	32	138.5	18/07/2013	2013-07	Monthly	0	NA	0	1-15 years	35.5	1	1	R1_Jul_2013
119	35	345.3402333	411.0927499	381.3432081	605.427604	34	10510.31026	128.3936243	459.9521921	205	13/12/2013	2013-12	Monthly	1	0	0	1-15 years	38	1	1	R1_Dec_2013
120	35	182.3183505	176.166156	200.2413183	291.3390819	21	9533.114498	79.63655178	305.4710953	64	15/12/2013	2013-12	PCD	1	1	NA	1-15 years	37.2	1	1	R1_Dec_2013
121	35	61.21638047	224.7017296	70	85.48272462	15	84.86811839	43.88136527	36.65653144	70	20/06/2013	2013-06	Monthly	0	NA	0	1-15 years	36.5	1	1	NA
122	35	85.1706163	330.760946	228.5738047	143.0527228	20	155.1874165	63.38419428	52.36647348	129	19/07/2013	2013-07	Monthly	0	NA	0	1-15 years	36.3	1	1	R1_Jul_2013
123	35	23.95423583	68.30932581	39	33.14636261	10	30.31004228	29.25424351	27.92878586	31	18/08/2013	2013-08	Monthly	0	NA	0	1-15 years	35	1	1	NA
124	35	154.371742	453.0384347	278.0718604	219.8127205	33	243.6927399	78.01131603	76.80416111	183	20/09/2013	2013-09	Monthly	0	NA	0	1-15 years	36.6	1	1	NA
125	35	126.4251336	385.2170145	259.2296398	176.1990854	37	204.8958858	74.76084453	92.51410315	155	24/09/2013	2013-09	PCD	1	1	1	1-15 years	39.8	1	1	NA
126	35	1487.338714	427.7608154	319.2177529	653.5650798	93	14712.65487	186.9021113	1708.892585	194	28/10/2013	2013-10	Monthly	0	NA	0	1-15 years	36.5	1	1	NA
127	35	513.0198841	517.3103831	516.3108112	776.9144543	52	12103.15556	170.6497538	702.5835192	303	14/11/2013	2013-11	PCD	1	1	0	1-15 years	36.3	1	1	NA
128	35	346.0056287	357.6019267	306.2975717	549.6480655	33	10826.1409	125.1431528	474.7893596	153	30/11/2013	2013-11	PCD	1	1	NA	1-15 years	37.8	1	1	NA
129	36	57	162	101.6343818	94	29.34566255	100	235	25	103	19/08/2013	2013-08	Monthly	0	NA	0	1-15 years	36	1	0	NA
130	36	58	183	101.6343818	93.5	27.71534797	95	244	24	113	18/09/2013	2013-09	Monthly	0	NA	0	1-15 years	36.4	1	0	NA
131	36	429.5	529.3262611	327.8971425	10364.59904	78.25510014	7319	5613.182055	4838.229443	114.5	21/10/2013	2013-10	Monthly	0	NA	0	1-15 years	36	1	0	NA
132	36	114.5	406.1560657	162.2785936	4088.744318	39.12755007	1829	982	501	106	19/11/2013	2013-11	Monthly	0	NA	0	1-15 years	35.8	1	0	NA
133	36	115	514.9362561	186.8666422	4444.642305	44.01849383	1376	932	374	129	12/12/2013	2013-12	Monthly	0	NA	0	1-15 years	35.5	1	0	R1_Dec_2013
134	36	48	171.5	132.775219	73	30.97597714	265.5	199.5	877	87.5	24/09/2013	2013-09	PCD	1	1	1	1-15 years	38.2	1	0	NA
135	37	64.5	366.4092544	75	552.7456712	24	75.5	769	42	93	14/12/2013	2013-12	Monthly	0	NA	0	>15 years	36.4	1	1	R1_Dec_2013
136	38	78	482.6286849	113.3903203	3845.814986	257.2923089	980	1792	718.8430282	89	14/12/2013	2013-12	Monthly	0	NA	0	>15 years	35.5	1	1	R1_Dec_2013
137	39	146	134	117.9872251	554.4999199	463.5154964	1315	3747.936016	1347.360231	67	14/12/2013	2013-12	Monthly	1	0	0	>15 years	37.5	1	1	R1_Dec_2013
138	40	51	361.3423725	75.08277963	65.97376426	53.14797117	815	272	167.4791349	49	13/12/2013	2013-12	Monthly	0	NA	0	>15 years	36.6	1	1	R1_Dec_2013
139	41	32	2932.233687	91.93809751	36.52119093	21.95242287	48	25	624.7536266	72	13/12/2013	2013-12	Monthly	0	NA	0	1-15 years	36	1	1	R1_Dec_2013
140	42	77	1496.849533	117.0011996	75.39858773	34.66172033	107	28	50.80827686	140.5	13/12/2013	2013-12	Monthly	0	NA	0	1-15 years	36.3	1	1	R1_Dec_2013
141	43	35	99	79.67968451	41.82265413	21.95242287	637	43	67.74436915	49.5	13/12/2013	2013-12	Monthly	0	NA	0	1-15 years	36.5	1	1	R1_Dec_2013
142	42	146.4730684	1234.036329	205.3497463	111.2364208	44.7422161	150.1834494	40.98844556	34.46251439	279	19/07/2013	2013-07	Monthly	0	NA	0	1-15 years	36.5	1	1	R1_Jul_2013
143	40	198.5727958	701.6452901	193.5525731	308.1757068	197	3631.860204	1050.834352	353.3083831	95	19/07/2013	2013-07	Monthly	0	NA	0	>15 years	36.3	1	1	R1_Jul_2013
144	41	95.3774846	1499.680054	239.1557387	188.5996439	19	87.10129849	64.59401563	2070.917917	143	19/07/2013	2013-07	Monthly	0	NA	0	1-15 years	35.3	1	1	R1_Jul_2013
145	44	86.05829288	87.98583591	12.22510827	10480.60796	6.755571652	5128.135382	4989.819784	276.1241188	148	12/12/2013	2013-12	Monthly	1	0	NA	>15 years	36.3	1	1	R1_Dec_2013
146	45	636	5062.926736	590.7534773	269	130	8292	152	806	498	14/12/2013	2013-12	Monthly	0	NA	1	1-15 years	35.7	1	1	R1_Dec_2013
147	46	53	164	73	71	24	80	185	30	87	14/12/2013	2013-12	Monthly	0	NA	0	1-15 years	35.3	1	1	R1_Dec_2013
148	47	46.5	151	104.1965105	49.4803232	20.7970322	44	23	41.3993367	66	14/12/2013	2013-12	Monthly	0	NA	0	1-15 years	36.6	1	1	R1_Dec_2013
149	48	831.5	326.9454677	168.0956184	46.29035751	30.44813612	5062.681168	65.86498052	162	71	14/12/2013	2013-12	Monthly	0	NA	0	1-15 years	35.8	1	1	R1_Dec_2013
150	49	2571.684925	571.1932669	402.2829919	1376.425455	1316.993165	3227.40611	7279.831803	4176.008189	197	14/12/2013	2013-12	Monthly	0	NA	0	>15 years	36.8	1	1	R1_Dec_2013
151	49	609.5169621	521.2035513	594.7644442	711.4615466	1459.191373	523.716644	3299.373808	281.7110188	492.5	19/07/2013	2013-07	Monthly	0	NA	0	>15 years	36	1	1	R1_Jul_2013
152	45	54.33678344	626.2805342	89.25857863	75.21700833	44.7422161	65.4645805	33.65367109	31.2566991	101	19/07/2013	2013-07	Monthly	0	NA	0	1-15 years	35.8	1	1	R1_Jul_2013
153	47	87.559658	171	218.4339163	138.047162	16	79.18299863	39.3865949	34.83322087	107	20/07/2013	2013-07	Monthly	0	NA	0	1-15 years	37	1	1	R1_Jul_2013
154	44	67.23330882	144	86	12120.89638	200	7363.359014	6016.190551	437.0739856	66	19/07/2013	2013-07	Monthly	0	NA	0	>15 years	35.8	1	1	R1_Jul_2013
155	48	157.9200975	374.5617166	88	134.1585096	18	76.54356534	56.71669665	48.10301929	103	19/07/2013	2013-07	Monthly	0	NA	0	1-15 years	36.5	1	1	R1_Jul_2013
156	50	90.68678864	181	601.8632391	540.7948063	557.2811457	162.3251472	1143.786716	268.7134181	91	19/07/2013	2013-07	Monthly	0	NA	0	>15 years	36	1	1	R1_Jul_2013
157	51	275.8863476	1752.103537	335.9472675	108.8352492	35.84009321	3532.869868	56.15972472	74.02925434	517	21/06/2013	2013-06	Monthly	1	2	0	1-15 years	36.7	1	1	NA
158	51	225.4472923	1784.77741	323.403852	108.8352492	33.50269583	2167.631843	61.7063642	47.99137868	529.5	19/07/2013	2013-07	Monthly	0	NA	0	1-15 years	37	1	1	R1_Jul_2013
159	51	153.60985	902.7113335	216.0589211	148.231342	1171.020753	170.7359014	623.3036114	6758.028828	189	18/08/2013	2013-08	Monthly	1	0	0	1-15 years	37.7	1	1	NA
160	51	220.8619237	1816.155519	352.2576642	11.25011163	34.28182829	1356.474015	58.23971452	37.26990046	553	18/09/2013	2013-09	Monthly	0	NA	0	1-15 years	36.6	1	1	NA
161	51	131.4472349	892.3672835	200.2039606	142.2794143	22.59484137	1404.838367	39.51980628	24.50623592	291	28/10/2013	2013-10	Monthly	0	NA	0	1-15 years	37.1	1	1	NA
162	51	133.7399192	1117.671888	205.2103087	125.8407568	22.59484137	1357.123201	42.29312602	24.50623592	298	25/11/2013	2013-11	Monthly	0	NA	0	1-15 years	36.6	1	1	NA
163	51	140.6179722	1106.001873	256.1332887	146.8142163	50.64360998	1367.510176	48.53309544	28.08006199	381	17/12/2013	2013-12	Monthly	0	NA	0	1-15 years	36.1	1	1	R1_Dec_2013
164	52	1242.958682	1822.206769	1496.769744	8216.582563	146	17721.46688	5689.194552	4495.792898	85	21/06/2013	2013-06	Monthly	0	NA	1	>15 years	35.3	1	1	NA
165	52	838.3982542	803.599569	699.767301	14398.64473	7397.040095	5064.201864	14585.81992	9892.905492	292	19/07/2013	2013-07	Monthly	0	NA	0	>15 years	36.1	1	1	R1_Jul_2013
166	52	326.709161	533.9340531	527.3834524	9542.811204	6832.892375	3258.329545	9910.981764	12962.41107	181	17/08/2013	2013-08	PCD	1	1	1	>15 years	36.7	1	1	NA
167	52	503.0389525	4424.690454	831.7838847	587.6843006	81	3953.641915	212.9058833	204.2292466	922.5	18/08/2013	2013-08	Monthly	0	NA	NA	>15 years	36.1	1	1	NA
168	52	699.9960027	1031.616428	1113.024619	13465.80208	9635.836519	5510.365687	14649.52935	25445.76017	509	18/09/2013	2013-09	Monthly	0	NA	0	>15 years	36.3	1	1	NA
169	52	604.1790594	1096.238378	1058.965669	12069.60002	5645.229536	4105.192126	13306.9513	17518.30683	527.5	28/10/2013	2013-10	Monthly	0	NA	0	>15 years	35.7	1	1	NA
170	52	397.906473	850.8806728	740.7765977	8304.535635	2848.836284	2520.583116	9347.411361	11208.2285	409.5	25/11/2013	2013-11	Monthly	0	NA	0	>15 years	36.1	1	1	NA
171	52	259.5042215	571.7367264	535.5391321	5881.752797	1873.715152	1717.366996	7110.138094	7449.593764	297	17/12/2013	2013-12	Monthly	0	NA	1	>15 years	36.3	1	1	R1_Dec_2013
172	52	285.1974223	401.2897567	458.8182247	4719.392482	1894.730969	1527.068833	5451.276791	4105.447876	297	17/12/2013	2013-12	Monthly	0	NA	1	>15 years	36.3	1	1	R1_Dec_2013
173	53	51	149	127.6380053	262.7169541	33.50632965	446.5	4087.465713	107.2619178	114	13/12/2013	2013-12	Monthly	0	NA	0	>15 years	35.8	1	1	R1_Dec_2013
174	54	62	131	507.3742375	340.7122515	420.9939313	889	8589.265188	329.3129056	71	13/12/2013	2013-12	Monthly	0	NA	0	>15 years	35.4	1	1	R1_Dec_2013
175	53	132.9030523	424.3416187	496.4100546	1149.249399	51	2628.875554	9045.514457	233.0508348	311	19/07/2013	2013-07	Monthly	0	NA	0	>15 years	35	1	1	R1_Jul_2013
176	54	200.1363611	417.042855	1086.776187	2016.687304	2974.643452	4386.738124	15398.39389	963.7191107	138	19/07/2013	2013-07	Monthly	0	NA	0	>15 years	35.4	1	1	R1_Jul_2013
177	55	180.2161898	554.8892992	203.3698755	79.53617214	56.97232067	442.1127994	52.508652	87.38105026	380.5	12/12/2013	2013-12	Monthly	0	NA	NA	1-15 years	36.6	1	1	R1_Dec_2013
178	56	507.7065222	456.0883358	315.7645148	457.3927641	115.388546	483.0239613	93.93911306	32.6984754	279	12/12/2013	2013-12	Monthly	0	NA	0	1-15 years	36.3	1	1	R1_Dec_2013
179	57	863.8588587	1038.426823	361.8492927	375.1572849	586.3815512	7645.929463	3069.307995	12617.30065	379.5	11/12/2013	2013-12	Monthly	0	NA	0	>15 years	35	1	1	R1_Dec_2013
180	57	383.1571515	475.1280837	120.5074811	168.3585724	55.64364847	6367.982826	2407.772686	8195.861879	273	20/07/2013	2013-07	Monthly	0	NA	0	>15 years	36	1	1	R1_Jul_2013
181	58	55.41923886	142.6982125	38.38514254	74.32045086	17.74452098	80.4063303	54.08395794	31.95519835	128	18/07/2013	2013-07	Monthly	0	NA	0	1-15 years	36	1	1	R1_Jul_2013
182	59	174.3375333	391.8228139	2281.402435	3188.122074	2762.361781	2296.30696	2978.524904	3091.475849	123	18/07/2013	2013-07	Monthly	0	NA	0	>15 years	35.8	1	1	R1_Jul_2013
183	60	1310.267739	542.9881039	61	128.3255309	19	110.8561981	705.8077806	43.12684488	65	18/07/2013	2013-07	Monthly	0	NA	0	1-15 years	36.6	1	1	R1_Jul_2013
184	55	96.94104992	431.6395626	260.5551417	326.6468059	31	242.8278625	53.56576906	101.182213	138	18/07/2013	2013-07	Monthly	0	NA	0	1-15 years	35.9	1	1	R1_Jul_2013
185	56	290.8231498	691.0815851	441.5219828	692.5883868	69	625.5456892	341.8756437	66.34899213	256.5	18/07/2013	2013-07	Monthly	0	NA	0	1-15 years	36.3	1	1	R1_Jul_2013
186	61	38	151	79.5	3017.296534	48	169.4634113	1558	29	85	18/07/2013	2013-07	Monthly	0	NA	0	>15 years	36.4	1	1	R1_Jul_2013
187	62	28	152	69	43	14	75.10310274	28	27	68	18/07/2013	2013-07	Monthly	0	NA	0	1-15 years	35.3	1	1	R1_Jul_2013
188	63	133.6434666	243.137667	10.8854569	1251.547971	14848.96501	1105.281998	1273.370925	4757.136501	253	13/12/2013	2013-12	Monthly	0	NA	NA	>15 years	35.3	1	1	R1_Dec_2013
189	63	114	638.8539158	240.7810759	3707.256804	25666.03115	3522.142946	4274.880762	9194.27555	193.5	19/07/2013	2013-07	Monthly	0	NA	0	>15 years	35	1	1	R1_Jul_2013
190	64	336	975.6650234	457.4756688	13403.65291	3251.214638	13709.20483	28810.66019	18254.37503	203	19/07/2013	2013-07	Monthly	0	NA	0	>15 years	36.8	1	1	R1_Jul_2013
191	65	41	157	195.6961892	190	18.5	154.0576466	45	31	97	19/07/2013	2013-07	Monthly	0	NA	0	1-15 years	36	1	0	R1_Jul_2013
192	66	108.5203916	268.360536	109.3246235	6.086635638	1271.412594	106.4664936	1518.728996	287.4377255	91	21/06/2013	2013-06	Monthly	1	0	0	>15 years	36.2	1	1	NA
193	66	224.6830642	498.6648711	198.9524432	175.7606406	2279.8388	272.0089075	3658.773247	470.9792216	201	19/07/2013	2013-07	Monthly	0	NA	0	>15 years	35.9	1	1	R1_Jul_2013
194	66	145.2033408	323.0826404	147.6614831	8.832874364	1548.140868	165.8670069	1965.480639	332.3658247	153	18/08/2013	2013-08	Monthly	0	NA	1	>15 years	36.4	1	1	NA
195	66	149.7887095	373.1490213	173.5104416	11.05271174	1407.594215	201.8968264	2012.945825	301.7330298	201.5	18/09/2013	2013-09	Monthly	0	NA	0	>15 years	36.5	1	1	NA
196	66	104.317137	264.9420648	119.3232103	11.43456944	1002.400808	134.3814889	1316.613048	239.9568934	128	22/10/2013	2013-10	Monthly	0	NA	0	>15 years	35.4	1	1	NA
197	66	178.0651495	390.701932	177.6805894	21.87353641	1443.755715	252.8579224	2228.757755	357.3826072	187.5	21/11/2013	2013-11	Monthly	0	NA	0	>15 years	36.5	1	1	NA
198	66	178.8293777	425.3896984	181.4339462	42.69000799	1669.361433	280.1237317	2314.902524	375.7622841	199	13/12/2013	2013-12	Monthly	0	NA	0	>15 years	35	1	1	R1_Dec_2013
199	67	46.61791469	183.376715	131.8237797	50.44967279	12.46611938	61.672664	29.8131872	11.2320248	121	21/06/2013	2013-06	Monthly	0	NA	0	1-15 years	36.5	1	1	NA
200	67	47.3821428	180.3890871	138.0750225	45.91487074	13.24525184	63.94481478	26.34653752	12.76366454	120	19/07/2013	2013-07	Monthly	0	NA	0	1-15 years	35.8	1	1	R1_Jul_2013
201	67	71.83744231	257.6784235	216.893516	94.38056763	16.36178169	116.2042827	34.31983177	17.86913036	207	18/08/2013	2013-08	Monthly	1	2	0	1-15 years	39.1	1	1	NA
202	67	82.53663584	272.6338871	248.6172041	84.46068815	17.14091415	140.8733483	35.35982668	17.86913036	208	18/09/2013	2013-09	Monthly	0	NA	0	1-15 years	36.5	1	1	NA
203	67	62.66670499	220.5180605	165.5878885	107.7015487	14.0243843	92.83358896	29.8131872	15.31639745	165.5	22/10/2013	2013-10	Monthly	0	NA	0	1-15 years	35.4	1	1	NA
204	67	78.71549529	329.0710807	228.9965226	82.19328713	17.92004661	124.6436999	34.66649674	17.35858378	218	21/11/2013	2013-11	Monthly	0	NA	0	1-15 years	35.4	1	1	NA
205	67	133.7399192	295.7151631	202.2898849	73.69053329	18.69917907	111.0107952	36.05315661	17.86913036	205.5	13/12/2013	2013-12	Monthly	0	NA	0	1-15 years	36.6	1	1	R1_Dec_2013
206	68	121.2433486	222.890027	197.7003401	277.4116267	43.70778257	245.1332675	47.19007088	47.49064285	193	13/12/2013	2013-12	Monthly	0	NA	0	1-15 years	36.7	1	1	R1_Dec_2013
207	69	39.5	347.6662257	45.46717172	51.84520041	10.30200094	55.26016388	77.15612004	29	67	13/12/2013	2013-12	Monthly	0	NA	0	1-15 years	36.6	1	1	R1_Dec_2013
208	70	67.23330882	361.2811533	76	143.8801407	47	467.1796919	4090.809479	2392.559966	83	19/07/2013	2013-07	Monthly	0	NA	0	>15 years	35.4	1	0	R1_Jul_2013
209	71	98.50461525	1105.854865	236.3935306	525.8754205	41	114.815348	12542.92375	1957.797086	124	19/07/2013	2013-07	Monthly	0	NA	0	>15 years	35.8	1	1	R1_Jul_2013
210	69	75	401.3872221	78	56	16	109.7660732	37	29	81	19/07/2013	2013-07	Monthly	0	NA	0	1-15 years	35.9	1	1	R1_Jul_2013
211	72	45	388.2250105	83	75	16	103.9889115	31	29	147	19/07/2013	2013-07	Monthly	0	NA	0	1-15 years	37.2	1	1	R1_Jul_2013
212	68	48	130	77	141	15	181.0177348	33	31	84	19/07/2013	2013-07	Monthly	0	NA	0	1-15 years	36.3	1	1	R1_Jul_2013
213	73	705	119	322.9762133	1353.44703	52.17006676	649	1202	5935.373159	73	21/06/2013	2013-06	Monthly	0	NA	0	>15 years	36.2	1	1	NA
214	73	676	122	365.6234636	1608.609644	55.43069593	726	1352.5	7158.060295	67	19/07/2013	2013-07	Monthly	0	NA	0	>15 years	36.1	1	1	R1_Jul_2013
215	73	472	95	225.3929194	991.0283201	42.38817924	473	861	4169.397285	50	18/09/2013	2013-09	Monthly	1	2	0	>15 years	36.3	1	1	NA
216	73	628.5	117	303.2921985	1385.353998	50.53975217	683	1186	6899.057341	52	22/10/2013	2013-10	Monthly	0	NA	0	>15 years	36.3	1	1	NA
217	73	694	119.5	286.8888445	1270.645495	53.80038135	569	1247	5457.09745	70	19/11/2013	2013-11	Monthly	0	NA	0	>15 years	36.6	1	1	NA
218	73	617.5	137	268.8473344	1250.804189	53.80038135	632	1125.5	5097.324935	63	13/12/2013	2013-12	Monthly	0	NA	0	>15 years	36.1	1	1	R1_Dec_2013
219	74	170.3412326	253.463551	200.2413183	124.7349961	25	1349.403082	158.4604857	47.12982614	86	21/06/2013	2013-06	Monthly	0	NA	0	1-15 years	36.2	1	1	NA
220	74	3224.277204	2365.105402	1851.322147	5644.211529	205	12839.86567	6993.750316	7493.531963	122	19/07/2013	2013-07	Monthly	0	NA	1	1-15 years	35.7	1	1	R1_Jul_2013
221	74	2843.121154	1332.933328	2295.274341	9163.220585	548.1031556	11982.76621	9400.077085	7569.792973	291	19/08/2013	2013-08	Monthly	1	1	1	1-15 years	36.6	1	1	NA
222	74	2042.126835	1148.319889	1377.713839	6076.41924	463.4129795	9710.731346	5203.763468	4409.547601	418	18/09/2013	2013-09	Monthly	0	NA	0	1-15 years	36.5	1	1	NA
223	74	586.2133825	415.116624	398.9041986	1999.869003	61	3888.778425	1729.250839	1886.938595	121	22/10/2013	2013-10	Monthly	0	NA	0	1-15 years	37.2	1	1	NA
224	74	590.8711506	401.3190709	334.4724463	1458.987443	47	3352.896877	1561.851556	1299.561317	121.5	19/11/2013	2013-11	Monthly	0	NA	0	1-15 years	36.5	1	1	NA
225	74	1353.414325	1015.162694	743.084867	3045.166624	107	7677.53371	2938.062662	2480.008656	331	13/12/2013	2013-12	Monthly	0	NA	0	1-15 years	36.9	1	1	R1_Dec_2013
226	75	57	137.5	64	157	50	65.5	1114	77	67	13/12/2013	2013-12	Monthly	0	NA	0	>15 years	36	1	1	R1_Dec_2013
227	76	11	62.75236027	6.495310245	10.64678223	3.20506696	14.87773643	21.64135074	11	10	13/12/2013	2013-12	Monthly	0	NA	0	1-15 years	36.2	1	0	R1_Dec_2013
228	77	11	28.3879725	7.085792995	18.516143	3.662933669	23.91064783	147.725742	11	9.5	13/12/2013	2013-12	Monthly	0	NA	0	1-15 years	36	1	1	R1_Dec_2013
229	78	147.0636856	666.5258654	234.0580309	306.8354441	136.171962	295.0719694	38.83115895	100.9831817	240	19/07/2013	2013-07	Monthly	0	NA	0	1-15 years	36.1	1	1	R1_Jul_2013
230	79	61.42418997	188.8374919	108.2371348	87.92974213	48.63284359	229.1260317	94.05769613	21.63925322	110	19/07/2013	2013-07	Monthly	0	NA	0	1-15 years	36	1	1	R1_Jul_2013
231	74	2493.348985	2330.771488	1766.280278	4679.248471	181	12188.90292	6522.857882	5742.840625	122	19/07/2013	2013-07	Monthly	0	NA	1	1-15 years	35.7	1	1	R1_Jul_2013
232	80	356.4928933	591.2997249	447.0138745	1453.499563	753.2539154	2647.351587	4980.880539	1263.118938	256	19/07/2013	2013-07	Monthly	1	2	0	>15 years	35.9	1	1	R1_Jul_2013
233	77	38	135	65	1131.459956	140.5	1883.35473	4502.784217	65	70	19/07/2013	2013-07	Monthly	0	NA	0	1-15 years	36	1	1	R1_Jul_2013
234	81	62	460.597361	87	127	18	121.3203967	39	41	108	19/07/2013	2013-07	Monthly	0	NA	0	1-15 years	35.3	1	1	R1_Jul_2013
235	82	75	165	148.0159031	475.4819499	361.064379	1307	7130.349073	1305.5	103	21/06/2013	2013-06	Monthly	0	NA	1	>15 years	36.3	1	1	NA
236	82	56	136	144.6132386	384.7334507	314.6507151	935	5509.0811	874	100	19/07/2013	2013-07	Monthly	0	NA	0	>15 years	36.5	1	1	R1_Jul_2013
237	82	50	119	122.4959198	233	275.5231651	523	4229.228638	620	72.5	18/09/2013	2013-09	Monthly	0	NA	0	>15 years	36.5	1	1	NA
238	82	44.5	124	110.5865942	224	265.7412776	520.5	4660.08665	637	67.5	22/10/2013	2013-10	Monthly	0	NA	0	>15 years	35.8	1	1	NA
239	82	80	382.1477194	149.1657299	647.394982	348.7080496	877	8490.184147	1043	145.5	19/11/2013	2013-11	Monthly	0	NA	0	>15 years	36.4	1	1	NA
240	83	59	151	63	41	22	544	43	32	64	13/12/2013	2013-12	Monthly	0	NA	0	1-15 years	36.4	1	1	R1_Dec_2013
241	84	876	139	69	43	23	2927	80	27.5	71	13/12/2013	2013-12	Monthly	0	NA	0	1-15 years	36.3	1	1	R1_Dec_2013
242	85	81.5	142	119.6603638	75.39858773	34.66172033	93	34	50.80827686	144	14/12/2013	2013-12	Monthly	0	NA	0	1-15 years	36.5	1	1	R1_Dec_2013
243	82	12	26.89386869	6.495310245	13.88710725	4.120800377	24.44199556	218.295364	21	10	13/12/2013	2013-12	Monthly	0	NA	0	>15 years	36	1	1	R1_Dec_2013
244	86	13105.14962	2967.931495	69.12406791	187.9388515	49.44960453	20762.86866	242.7594996	20474.44397	286	13/12/2013	2013-12	Monthly	0	NA	1	1-15 years	36.5	1	1	R1_Dec_2013
245	87	51.97431459	142.1969065	99.05947572	487.6423556	60.30472605	82.31208283	579.447183	159.4893108	123	19/07/2013	2013-07	Monthly	0	NA	0	>15 years	36	1	1	R1_Jul_2013
246	83	365.0925025	344.012923	237.7746623	159.4347505	1533.892249	2263.314044	122.8861761	61.37281772	116	19/07/2013	2013-07	Monthly	0	NA	0	1-15 years	36.6	1	1	R1_Jul_2013
247	85	73.4875701	112	197.700548	108.8822686	15	118.7744979	61.44308804	41.46812008	107	19/07/2013	2013-07	Monthly	0	NA	0	1-15 years	36.3	1	1	R1_Jul_2013
248	88	98.50461525	180.5	211.5240291	184.7109914	21	114.815348	53.56576906	51.4204689	128	19/07/2013	2013-07	Monthly	0	NA	0	1-15 years	36.2	1	1	R1_Jul_2013
249	89	110	521.4184301	266.6509344	2153.153452	1925.543983	2293.533214	22066.40724	6603.151193	154.5	19/07/2013	2013-07	Monthly	0	NA	0	>15 years	36.2	1	1	R1_Jul_2013
250	84	268	496.7653699	272.4912737	86	31	18241.91708	166	41	120	19/07/2013	2013-07	Monthly	0	NA	0	1-15 years	36.6	1	1	R1_Jul_2013
251	90	86.23011285	236.1684152	152.1377559	543.2480742	1240.554637	176.1767387	3423.453297	91.76646273	184	23/07/2013	2013-07	Monthly	0	NA	0	1-15 years	36.5	1	1	R1_Jul_2013
252	91	98	353.6665892	209.0574744	1129.796348	551.1771846	874.2771447	18007.37347	10671.89054	130	23/07/2013	2013-07	Monthly	0	NA	0	>15 years	35.8	1	1	R1_Jul_2013
253	92	84	130.5	76	853.0899868	1089.28951	36	9021.959795	639	45	16/12/2013	2013-12	Monthly	0	NA	0	>15 years	36.1	1	1	R1_Dec_2013
254	92	233.1104666	258.5666999	157.0965989	2030.661452	3140.494193	92.3960922	12921.66539	4209.017569	68	23/07/2013	2013-07	Monthly	0	NA	0	>15 years	36.1	1	1	R1_Jul_2013
255	93	629.1382854	1202.670875	159.4203849	1002.014109	160.6959414	2033.393411	18849.78733	954	172.5	23/07/2013	2013-07	Monthly	0	NA	0	>15 years	36.3	1	1	R1_Jul_2013
256	94	1130.788945	718.6798089	12.904124	2715.407516	2517.290632	277.9527726	7341.168478	5193.514815	171.5	15/12/2013	2013-12	Monthly	0	NA	NA	>15 years	35.4	1	1	R1_Dec_2013
257	95	84.5	557.8491981	85	479.6673288	464.2616168	589	4469.164227	1164.5	83.5	14/12/2013	2013-12	Monthly	0	NA	0	>15 years	37.1	1	1	R1_Dec_2013
258	96	46	148	65.5	59	24	63	394.5	30	74	14/12/2013	2013-12	Monthly	0	NA	0	1-15 years	36	1	1	R1_Dec_2013
259	97	62	362.9380917	663.6512975	321.6221008	196.4164152	1013	1371.5	839.2774623	109	15/12/2013	2013-12	Monthly	0	NA	0	>15 years	36	1	1	R1_Dec_2013
260	98	566	1543.057148	933.1753037	10922.36705	1213.047354	10638.35233	4842.933646	3683.955986	152	15/12/2013	2013-12	Monthly	0	NA	1	>15 years	36	1	0	R1_Dec_2013
261	99	40	298.6897743	44.28620622	56.47423616	7.783734046	87.14102766	62.10126735	26.5	75	15/12/2013	2013-12	Monthly	0	NA	1	1-15 years	36.4	1	1	R1_Dec_2013
262	100	240	889.5147793	117.006898	5108.113923	7411.073782	8055.231581	12921.94269	30710.25402	330.5	15/12/2013	2013-12	Monthly	0	NA	0	>15 years	35.3	1	1	R1_Dec_2013
263	101	40	331.9686885	42.51475797	66.65811481	10.07306759	449.5201793	519.3924178	80	65	14/12/2013	2013-12	Monthly	0	NA	0	>15 years	36.1	1	1	R1_Dec_2013
264	102	58.985331	173.285773	129.5765798	190.4770419	23.21871695	183.4723196	132.3558668	172	112	22/07/2013	2013-07	Monthly	0	NA	0	>15 years	36.1	1	1	R1_Jul_2013
265	103	53.36768043	151.7744356	86.93003136	68.92261385	16.31585515	558.9505551	81.56815044	29	78	22/07/2013	2013-07	Monthly	0	NA	0	>15 years	35.6	1	1	R1_Jul_2013
266	100	198.447383	451.2959369	203.3004918	2763.574074	3734.735427	4543.530701	6032.827354	15521.12257	299	22/07/2013	2013-07	Monthly	0	NA	0	>15 years	35.4	1	1	R1_Jul_2013
267	104	63.78665882	206.4699083	91.89936498	67.80124695	42.79690236	3664.091079	43.14573217	24.84506851	104	22/07/2013	2013-07	Monthly	0	NA	0	1-15 years	36.3	1	0	R1_Jul_2013
268	96	68.51159651	152.4350838	92.94303609	100.6424759	35.01564738	123.7088028	604.0402504	25.64652234	100	22/07/2013	2013-07	Monthly	0	NA	0	1-15 years	36.2	1	1	R1_Jul_2013
269	95	151.7886233	361.0066645	125.5827654	613.0989143	947.5561611	1311.217039	5008.772895	1764.189028	152	22/07/2013	2013-07	Monthly	0	NA	0	>15 years	36.2	1	1	R1_Jul_2013
270	101	61.42418997	256.096591	91.92378319	91.10792559	48.63284359	468.8419221	232.9869537	80.94683612	103	22/07/2013	2013-07	Monthly	0	NA	0	>15 years	36.3	1	1	R1_Jul_2013
271	105	125.0852257	583.3613498	315.0214946	383.0322664	37	292.9770949	50.41484147	43.12684488	184	22/07/2013	2013-07	Monthly	0	0	0	1-15 years	36.3	1	1	R1_Jul_2013
272	106	109.4495725	351.9833577	221.197514	182.7666652	19	129.9920894	55.14123286	74.64261614	120	22/07/2013	2013-07	Monthly	0	NA	0	1-15 years	36.3	1	1	R1_Jul_2013
273	107	148.5387055	561.5241361	316.3990219	309.1478699	21	3720.941077	6227.958297	66.34899213	215	22/07/2013	2013-07	Monthly	0	NA	0	1-15 years	36.8	1	1	R1_Jul_2013
274	99	118.8309644	425.0051023	232.2498066	200.2656012	21	223.0321128	66.16947943	53.9085561	139	22/07/2013	2013-07	Monthly	0	NA	0	1-15 years	35.5	1	1	R1_Jul_2013
275	97	84.43252735	414.3885584	1395.212764	827.2523978	644.4258802	2660.548754	3456.246344	1800.545774	133	22/07/2013	2013-07	Monthly	1	0	0	>15 years	36.3	1	1	R1_Jul_2013
276	94	5408.004366	2740.789818	252.9633997	6809.987135	6115.373073	2705.41912	14797.25355	36185.68704	144	22/07/2013	2013-07	Monthly	0	NA	0	>15 years	35.6	1	1	R1_Jul_2013
277	108	111	489.6317209	258.422566	113	42	169	117	88	173	14/12/2013	2013-12	Monthly	0	NA	0	1-15 years	36.1	1	1	R1_Dec_2013
278	108	121.349023	243.5269387	153.4683406	166.0834565	34.06948029	320.6326505	77.1197178	57.41103433	297	22/07/2013	2013-07	Monthly	0	NA	0	1-15 years	36.4	1	1	R1_Jul_2013
279	109	112	762.7201754	389.2009038	13295.13424	1032.008962	929.1601813	10842.18419	254	242	23/07/2013	2013-07	Monthly	0	NA	0	>15 years	35.5	1	1	R1_Jul_2013
280	110	135.5	472.7941349	260.2150944	771.9259474	128	881	106	690	151	14/12/2013	2013-12	Monthly	0	NA	0	1-15 years	35.2	1	1	R1_Dec_2013
281	111	30	112.5	45	29	21	29	22.5	23	46	14/12/2013	2013-12	Monthly	0	NA	0	1-15 years	36.1	1	1	R1_Dec_2013
282	112	110	445.1232745	189.6957839	160.2219989	70.47883133	175	281	386.7074406	201.5	14/12/2013	2013-12	Monthly	0	NA	0	1-15 years	36.6	1	1	R1_Dec_2013
283	113	30	218.1391571	36.90517185	100.9129794	6.41013392	58.44825026	58.33755418	43	57	14/12/2013	2013-12	Monthly	0	NA	0	1-15 years	36.8	1	1	R1_Dec_2013
284	114	8502.674803	2333.993578	3.155933723	4891.483774	4831.843252	22236.08282	31414.03187	33956.02904	112	14/12/2013	2013-12	Monthly	0	NA	0	>15 years	36	1	1	R1_Dec_2013
285	115	69.69283093	199.0756692	112.8273335	351.7145219	235.382963	111.1935154	1506.845605	851.9454138	109	23/07/2013	2013-07	Monthly	0	NA	0	>15 years	35	1	1	R1_Jul_2013
286	113	43.11505642	134.2338798	74.99833234	141.9588608	27.23439241	71.24086701	26.75035395	39.27123733	72	22/07/2013	2013-07	Monthly	0	NA	0	1-15 years	36.8	1	1	R1_Jul_2013
287	110	223.589841	411.7341556	308.1327958	491.9145351	603.0408775	2372.850526	245.7723522	2034.425971	165	22/07/2013	2013-07	Monthly	0	NA	0	1-15 years	35.5	1	1	R1_Jul_2013
288	116	35.15449304	75.26807145	60.8957631	1691.785448	910.6113723	172.6834592	718.2898125	75.56089408	59	22/06/2013	2013-06	Monthly	0	NA	NA	1-15 years	36.3	1	1	NA
289	117	32.47969466	123.6546888	107.6583559	39.67951792	20.25744399	73.35801086	29.8131872	11.2320248	108	22/07/2013	2013-07	Monthly	0	NA	0	1-15 years	36.3	1	1	R1_Jul_2013
290	117	3466.054372	5163.448903	182.2680542	267.153674	81.28527843	4140.507905	5012.725493	263.7180805	205	21/08/2013	2013-08	Monthly	0	NA	0	1-15 years	36.3	1	1	NA
291	117	29.04066817	95.87718625	73.46155548	39.11266767	10.90785446	55.5053976	19.41323817	8.679291888	79	19/09/2013	2013-09	Monthly	0	NA	0	1-15 years	36.6	1	1	NA
292	117	34.39026493	136.1993674	103.0763632	36.84526664	11.68698692	74.65638273	22.87988785	11.2320248	95	23/10/2013	2013-10	Monthly	0	NA	0	1-15 years	37	1	1	NA
293	117	61.90247688	227.3506539	163.9201051	67.45518047	18.69917907	142.1717202	40.21313622	13.7847577	196	20/11/2013	2013-11	Monthly	0	NA	0	1-15 years	36.4	1	1	NA
294	117	55.02442389	201.7317014	151.8299655	72.8402579	16.36178169	142.8209061	31.893177	11.74257138	157	14/12/2013	2013-12	Monthly	0	NA	0	1-15 years	35.9	1	1	R1_Dec_2013
295	118	29	101	46	34	15	76	455.5	21	39.5	17/12/2013	2013-12	Monthly	0	NA	0	>15 years	36.6	1	1	R1_Dec_2013
296	119	26	88	38	1100.177494	81	153.5	3893.149504	129	37	17/12/2013	2013-12	Monthly	0	NA	0	>15 years	35.8	1	1	R1_Dec_2013
297	117	36	152	59	40.5	18	56	25.5	19	157	14/12/2013	2013-12	Monthly	0	NA	0	1-15 years	35.9	1	1	R1_Dec_2013
298	116	33	78	73.55047801	989.3916064	192.1923415	75	587	95.97118963	46	14/12/2013	2013-12	Monthly	0	NA	0	1-15 years	36.2	1	1	R1_Dec_2013
299	120	44	358.948802	128.7133365	101.3168523	32.35093897	69	1776.5	665.2120693	84.5	14/12/2013	2013-12	Monthly	0	NA	0	>15 years	36.5	1	1	R1_Dec_2013
300	116	88.59258169	158.1229601	90.90457394	2973.907435	1595.582754	326.3601881	1256.403721	136.2471499	112.5	22/07/2013	2013-07	Monthly	0	NA	0	1-15 years	36	1	1	R1_Jul_2013
301	121	53.15554902	207.0386959	103.1379876	136.6618884	46.68752984	410.1163425	566.9349207	32.85960674	112	22/07/2013	2013-07	Monthly	0	NA	0	>15 years	36.3	1	1	R1_Jul_2013
302	122	67.33036209	220.8455163	157.2482639	129.246127	40.85158861	151.1461638	44.00864681	27.24942998	128.5	22/07/2013	2013-07	Monthly	0	NA	0	1-15 years	36.8	1	1	R1_Jul_2013
303	118	65.6697435	102	60.5	128.3255309	14	364.901652	2152.871277	39.80939528	61	22/07/2013	2013-07	Monthly	0	NA	0	>15 years	36.7	1	1	R1_Jul_2013
304	119	89.12322332	374.5617166	197.700548	3357.205389	1991.250188	1306.519477	7846.513885	1101.393269	77	22/07/2013	2013-07	Monthly	0	NA	0	>15 years	35.3	1	1	R1_Jul_2013
305	123	21.35641299	194.788074	69.06323176	78.54134395	25.46897476	30.90731028	25.3176459	17.41103782	40	19/06/2013	2013-06	Monthly	0	NA	0	1-15 years	36.3	1	1	NA
306	123	39.42722399	368.1788759	101.3427857	131.1640444	31.34643047	42.49755164	35.67486467	32.0729644	75.5	18/07/2013	2013-07	Monthly	0	NA	0	1-15 years	36.3	1	1	R1_Jul_2013
307	123	30.39181849	243.1445539	103.5948476	114.6703622	29.38727857	39.40682061	35.67486467	24.74200111	79	17/08/2013	2013-08	Monthly	0	NA	NA	1-15 years	37.3	1	1	NA
308	123	30.39181849	364.5082826	99.09072383	116.241189	27.42812666	44.04291715	34.52406258	22.90926028	70	21/10/2013	2013-10	Monthly	0	NA	0	1-15 years	35.8	1	1	NA
309	123	82.96145048	492.8022039	308.7566496	697.8655431	60.73370904	8822.725098	1075.999951	405.9520922	266.5	18/11/2013	2013-11	Monthly	0	NA	0	1-15 years	36.5	1	1	NA
310	123	39.42722399	313.5599222	99.09072383	133.5202847	29.38727857	45.58828267	36.82566676	23.8256307	67.5	11/12/2013	2013-12	Monthly	0	NA	0	1-15 years	36.4	1	1	R1_Dec_2013
311	124	78.03304748	239.7391679	225.3217968	205.7783211	52.89710142	146.0370411	98.96897941	36.65481646	167	19/06/2013	2013-06	Monthly	0	NA	1	1-15 years	36.7	1	1	NA
312	124	148.6734905	483.653419	320.2773354	356.5777015	94.03929141	268.1209167	195.0609536	70.56052168	307	18/07/2013	2013-07	Monthly	0	NA	0	1-15 years	36.7	1	1	R1_Jul_2013
313	124	106.3713647	400.2864076	283.9388513	381.7109316	70.52946856	190.0799582	163.4138962	63.22955839	267	17/08/2013	2013-08	Monthly	0	NA	NA	1-15 years	36.1	1	1	NA
314	124	110.8890675	407.6224162	266.2006175	325.9465774	76.40692427	198.5794686	127.7390316	50.40037263	220	17/09/2013	2013-09	Monthly	0	NA	0	1-15 years	36.4	1	1	NA
315	124	85.42565198	338.8085571	228.8802696	243.4781662	62.69286094	156.8545997	105.8737919	43.06940933	167.5	21/10/2013	2013-10	Monthly	0	NA	0	1-15 years	36.5	1	1	NA
316	124	115.4067702	444.2836092	295.46198	376.9984509	94.03929141	231.8048271	141.5486566	58.64770633	244.5	18/11/2013	2013-11	Monthly	0	NA	0	1-15 years	36.4	1	1	NA
317	124	101.853662	443.3674958	256.4347484	394.2775466	94.03929141	227.1687306	131.1914378	53.14948386	189	12/12/2013	2013-12	Monthly	0	NA	0	1-15 years	36.4	1	1	R1_Dec_2013
318	125	47	142	120.7945876	237.5	48.90943759	70.5	210.5	174	79	19/06/2013	2013-06	Monthly	1	0	0	1-15 years	35.2	1	1	NA
319	125	64	350.1297752	124.5801491	402.0213596	68.47321262	98.5	201	231.5	117	17/08/2013	2013-08	Monthly	1	2	NA	1-15 years	35.9	1	1	NA
320	125	72	379.7466417	151.6243577	519.5488945	71.73384179	117	220	279	127.5	17/09/2013	2013-09	Monthly	0	NA	0	1-15 years	36.6	1	1	NA
321	125	80	407.7564636	157.3612156	528.1887029	74.99447097	125	217	277	131	21/10/2013	2013-10	Monthly	0	NA	0	1-15 years	36.3	1	1	NA
322	125	47	151	149.7172353	172.5	44.01849383	82	123.5	149	84	18/11/2013	2013-11	Monthly	0	NA	0	1-15 years	35.6	1	1	NA
323	125	24	80	79.9626143	93	26.08503338	42	63	81	40	17/12/2013	2013-12	Monthly	0	NA	0	1-15 years	35.8	1	1	R1_Dec_2013
324	126	79.84745278	392.6936115	222.6737303	147.4140863	88	251.5733509	53.63277977	127.4250855	103	19/06/2013	2013-06	Monthly	1	0	0	1-15 years	36.5	1	1	NA
325	126	110.455643	476.0049108	282.1910296	211.0899935	147	374.6321226	79.63655178	174.5549116	183	17/08/2013	2013-08	Monthly	0	NA	0	1-15 years	35.5	1	1	NA
326	126	45.24688991	276.8325309	71	89.84408812	49	140.6385962	42.25612952	73.31306288	67	17/09/2013	2013-09	Monthly	0	NA	0	1-15 years	36	1	1	NA
327	126	60.55098503	297.50509	88	104.672724	49	162.4618266	48.75707252	83.78635757	95	21/10/2013	2013-10	Monthly	0	NA	0	1-15 years	36.9	1	1	NA
328	126	67.87033486	289.4158278	88	119.5013599	47	2482.392463	55.25801552	9617.516909	88.5	26/10/2013	2013-10	PCD	1	1	1	1-15 years	39.9	1	1	NA
329	126	9080.696829	622.6460721	739.6223787	183.177267	499.906469	28375.08599	287.6667279	36000.70351	148.5	18/11/2013	2013-11	Monthly	0	NA	0	1-15 years	36	1	1	NA
330	126	6259.182943	436.3798306	506.9827877	125.6072688	173	26728.61158	212.0932655	31891.58489	87	22/11/2013	2013-11	PCD	1	1	1	1-15 years	39.1	1	1	NA
331	126	5136.501767	670.0798021	1306.145399	134.3299958	136	24543.4093	682.5990153	25385.27262	99	17/12/2013	2013-12	Monthly	0	NA	0	1-15 years	36.8	1	1	R1_Dec_2013
332	127	107.3197535	295.4066296	89.02141509	17.36069568	27.0253316	7288.332098	726.7864213	244.6669407	339	12/12/2013	2013-12	Monthly	0	NA	NA	>15 years	36.2	1	1	R1_Dec_2013
333	128	291.5857453	691.6783155	109.1217446	95.4667268	164.2388046	3897.867908	77.92950733	60.29292468	332	12/12/2013	2013-12	Monthly	0	NA	NA	1-15 years	36	1	1	R1_Dec_2013
334	129	247.0379231	434.9089118	238.277357	70.81663646	58.06794222	348.3736932	85.84747867	58.54530367	445	12/12/2013	2013-12	Monthly	0	NA	NA	1-15 years	36.1	1	1	R1_Dec_2013
335	130	494.5820714	447.5202842	298.1625421	9.776843331	46.01610516	1375.306588	287.54738	89.12867126	533	12/12/2013	2013-12	Monthly	0	NA	NA	1-15 years	36.3	1	1	R1_Dec_2013
336	131	697.8381371	162.2998646	178.8244421	75.71324969	83.91894254	182.7357085	145.5394709	2578.547412	151	12/12/2013	2013-12	Monthly	0	NA	0	>15 years	36.4	1	1	R1_Dec_2013
337	132	102	653.4784815	218.9843774	122	37	429	137	39	162	11/12/2013	2013-12	Monthly	0	NA	0	1-15 years	36.4	1	1	R1_Dec_2013
338	133	50	150	73	58	21	86	79.5	21	71	12/12/2013	2013-12	Monthly	0	NA	0	1-15 years	36.6	1	1	R1_Dec_2013
339	134	47	147	64	53	22	47.5	36	25	74	11/12/2013	2013-12	Monthly	0	NA	0	1-15 years	36.3	1	1	R1_Dec_2013
340	135	271	521.8040424	1466.782999	89.5	57	946.6619465	361	4101.304344	114	11/12/2013	2013-12	Monthly	0	NA	0	>15 years	36	1	1	R1_Dec_2013
341	133	138.6530657	315.3832654	166.3924232	247.885461	166.5042285	251.3717214	359.9356883	34	157	18/07/2013	2013-07	Monthly	0	NA	0	1-15 years	36.4	1	1	R1_Jul_2013
342	136	143.3256178	132.0327526	69.40637381	304.5885377	130.9545648	1140.578685	1092.696261	463.6211829	168	18/07/2013	2013-07	Monthly	0	NA	0	>15 years	36	1	1	R1_Jul_2013
343	134	76.44032947	166.9240801	45.40849156	87.21277397	15.61517846	89.340367	145.2254426	44.41230957	136	18/07/2013	2013-07	Monthly	0	NA	0	1-15 years	36.5	1	1	R1_Jul_2013
344	130	179.6347742	284.4546286	194.4680277	145.228228	36.90860364	1444.335933	342.5317336	62.82716964	374	18/07/2013	2013-07	Monthly	0	NA	0	1-15 years	36.1	1	1	R1_Jul_2013
345	132	84.08436241	283.6266663	79.35388519	106.9304446	17.03474014	696.8548626	187.2907432	40.62101485	206	18/07/2013	2013-07	Monthly	0	NA	0	1-15 years	36	1	1	R1_Jul_2013
346	128	260.8526243	354.1666671	81.012847	64.46161554	107.1769067	3007.792356	66.10261526	38.99617426	203	18/07/2013	2013-07	Monthly	0	NA	0	1-15 years	36.3	1	1	R1_Jul_2013
347	127	132.3373204	441.2635145	201.1741468	410.256121	33.35969945	11493.58422	1618.512519	561.653232	341	18/07/2013	2013-07	Monthly	0	NA	0	>15 years	36.6	1	1	R1_Jul_2013
348	129	174.8572537	404.1252177	220.0543063	246.3426212	60.33137134	374.733206	101.1570324	63.9103967	393	18/07/2013	2013-07	Monthly	0	NA	0	1-15 years	35.8	1	1	R1_Jul_2013
349	137	320.0938796	2264.608788	189.8596139	7474.864092	28969.29867	3945.866209	34476.02655	1894.077444	441	18/07/2013	2013-07	Monthly	0	NA	0	>15 years	36	1	1	R1_Jul_2013
350	135	504.2498161	435.6199092	1816.634596	173.0450341	49	890.1488762	617.581808	5068.679303	155.5	18/07/2013	2013-07	Monthly	0	NA	0	>15 years	35.3	1	1	R1_Jul_2013
351	131	300.2045417	122	75	75.8287228	15	69.94498212	159.1218434	819.4100528	70	18/07/2013	2013-07	Monthly	0	NA	0	>15 years	35.8	1	1	R1_Jul_2013
352	138	685.4289915	148.2862375	7.478584934	131.1462106	9.618852417	2305.702194	374.2283293	256.9002878	147	15/12/2013	2013-12	Monthly	0	NA	NA	1-15 years	36.1	1	1	R1_Dec_2013
353	139	53	513.4290626	79.82591637	106.4678223	27.92986922	96.70528679	301.0970538	262.5	141.5	15/12/2013	2013-12	Monthly	0	NA	0	>15 years	35.6	1	1	R1_Dec_2013
354	140	2160.190521	968.7944191	3371.969488	535.4183058	241.6001629	1381.020328	5561.849016	3301.990965	147	22/07/2013	2013-07	Monthly	0	NA	0	1-15 years	36.2	1	1	R1_Jul_2013
355	141	214.9846649	234.1250381	886.5556046	2985.402156	19691.26452	7694.976352	4971.14205	1607.09738	135	23/07/2013	2013-07	Monthly	0	NA	0	>15 years	36	1	1	R1_Jul_2013
356	138	868.2073006	241.2772952	113.3374125	219.2946581	429.0354001	2849.63468	478.0547124	252.4579542	138	22/07/2013	2013-07	Monthly	0	NA	0	1-15 years	36.5	1	1	R1_Jul_2013
357	139	118.0491818	719.4682416	472.4050531	491.9145351	159	271.8616286	434.8280077	1064.901324	229.5	22/07/2013	2013-07	Monthly	0	NA	0	>15 years	35.9	1	1	R1_Jul_2013
358	142	82.86896203	190	192.1698221	281.9273027	47	5999.431863	9872.437211	155.9201315	87.5	22/07/2013	2013-07	Monthly	0	NA	0	1-15 years	35.8	1	1	R1_Jul_2013
359	143	109.3446545	249.4037304	729.3592845	160.9792952	92.50065137	680.8910201	149.1912493	3852.257933	246	12/12/2013	2013-12	Monthly	0	NA	NA	>15 years	36	1	1	R1_Dec_2013
360	144	96.18279792	164.4197008	63.92194246	690.774507	9.640597172	177.2182107	714.2843613	537.8303643	238.5	12/12/2013	2013-12	Monthly	0	NA	NA	>15 years	36.3	1	1	R1_Dec_2013
361	145	128	883.4421664	198.3668952	1208.389142	66	1194	5330.441794	601	131	14/12/2013	2013-12	Monthly	0	NA	0	>15 years	36.1	1	1	R1_Dec_2013
362	146	42	170	91.93809751	40.05549973	24.26320423	40	23	41.3993367	65	12/12/2013	2013-12	Monthly	0	NA	0	1-15 years	35.8	1	1	R1_Dec_2013
363	147	42	167	95.00270076	47.12411733	26.57398558	51	25	48.92648883	73	12/12/2013	2013-12	Monthly	0	NA	0	1-15 years	37	1	1	R1_Dec_2013
364	146	139.5196473	1419.133749	175.6900874	192.5879351	77.44382719	134.5178401	94.92809362	36	208	22/07/2013	2013-07	Monthly	0	NA	0	1-15 years	35.8	1	1	R1_Jul_2013
365	148	131.7204124	636.4972521	157.0965989	448.1006411	60.01896607	422.5762452	5167.309927	3318.317998	184	23/07/2013	2013-07	Monthly	0	NA	0	>15 years	36.1	1	1	R1_Jul_2013
366	147	73.65944113	247.6910137	93.23398775	112.5018631	49.37043983	85.60226189	61.30772713	27	105	22/07/2013	2013-07	Monthly	0	NA	0	1-15 years	36.6	1	1	R1_Jul_2013
367	145	363.9642973	1002.576225	189.0587942	1956.55018	326.232122	4610.293247	7315.654786	3513.928865	193	22/07/2013	2013-07	Monthly	0	NA	0	>15 years	36.7	1	1	R1_Jul_2013
368	144	162.9173521	366.7934196	230.3534239	2074.395508	561.6301736	304.3635978	2683.696313	969.5	218	22/07/2013	2013-07	Monthly	0	NA	0	>15 years	36.4	1	1	R1_Jul_2013
369	143	242.6428649	575.8210396	1996.170749	1474.710418	1023.653832	2107.446162	623.9544487	11643.93028	238	22/07/2013	2013-07	Monthly	0	NA	0	>15 years	36.1	1	1	R1_Jul_2013
370	149	366.4855764	683.1345952	410.3213433	409.4728325	124.1301025	6552.857938	220.0733212	145.5860691	348	12/12/2013	2013-12	Monthly	0	NA	0	1-15 years	36.3	1	1	R1_Dec_2013
371	150	163.265191	452.7318177	267.3400917	123.2541274	62.93920691	161.0079871	50.27727178	49.82624823	310	12/12/2013	2013-12	Monthly	0	NA	0	1-15 years	36.6	1	1	R1_Dec_2013
372	151	122.6211139	281.333884	248.4492996	203.075848	47.20440518	274.6606839	289.3148271	31.91994027	233	12/12/2013	2013-12	Monthly	0	NA	0	1-15 years	36.5	1	1	R1_Dec_2013
373	152	1143.54522	1502.060943	1249.522359	1002.84098	131.1233477	13637.79249	4399.886012	550.8136035	342	12/12/2013	2013-12	Monthly	0	NA	0	1-15 years	36.5	1	1	R1_Dec_2013
374	153	279.686361	301.9486195	283.8725492	241.8128595	143.3615268	255.1614467	53.80550138	40.48382669	265	17/12/2013	2013-12	Monthly	0	NA	0	1-15 years	36.6	1	1	R1_Dec_2013
375	154	108.8434607	170.0779594	211.8598867	159.0565168	83.91894254	367.1427803	63.50813277	29.58433489	145.5	12/12/2013	2013-12	Monthly	0	NA	0	1-15 years	35.9	1	1	R1_Dec_2013
376	155	60.5	366.4092544	85	58.5	27	799	189	29	88	14/12/2013	2013-12	Monthly	0	NA	0	1-15 years	35.8	1	1	R1_Dec_2013
377	156	72	179.5	86	53	31	62	30	103	109	14/12/2013	2013-12	Monthly	0	NA	0	1-15 years	36.5	1	0	R1_Dec_2013
378	157	246.5	456.8410369	209.124027	4049.281898	1689.97177	7508	17193.61291	5560.866952	138	14/12/2013	2013-12	Monthly	0	NA	0	>15 years	35	1	1	R1_Dec_2013
379	158	30	127	79.67968451	47.12411733	21.95242287	34	923	414.9342611	50	12/12/2013	2013-12	Monthly	0	NA	0	>15 years	35.3	1	1	R1_Dec_2013
380	159	109	178	102.6642089	58.90514666	20.7970322	8602	989	8032.350675	59	12/12/2013	2013-12	Monthly	0	NA	0	1-15 years	35.6	1	0	R1_Dec_2013
381	160	44	402.8324598	126.4148841	54.19273493	31.19554829	51.5	27	45.16291277	72	12/12/2013	2013-12	Monthly	0	NA	0	1-15 years	36.9	1	1	R1_Dec_2013
382	161	65	1679.096012	88.63812679	81.87815386	34.66172033	62	1662.5	1098.964211	95.5	12/12/2013	2013-12	Monthly	0	NA	0	>15 years	36.3	1	1	R1_Dec_2013
383	162	125	504.9732704	347.6098833	209.7023221	58.92492455	1380	30	71.50794522	246	12/12/2013	2013-12	Monthly	0	NA	0	1-15 years	36.8	1	1	R1_Dec_2013
384	163	54	175.5	131.7779398	97.78254346	31.19554829	107	51	76.2124153	105	12/12/2013	2013-12	Monthly	0	NA	0	1-15 years	36	1	1	R1_Dec_2013
385	164	50	351.7681498	86.86550625	89.53582293	26.57398558	416	122	79.03509735	81.5	12/12/2013	2013-12	Monthly	0	NA	0	1-15 years	36.3	1	1	R1_Dec_2013
386	165	110.5	362.1402316	102.8193753	2460.417525	70.47883133	4190.5	4587.523825	997.347657	99	12/12/2013	2013-12	Monthly	0	NA	0	>15 years	36.3	1	1	R1_Dec_2013
387	166	40	158	96.53500239	381.3037652	39.28328304	53	79	645.453295	61.5	12/12/2013	2013-12	Monthly	0	NA	0	>15 years	36.5	1	1	R1_Dec_2013
388	167	5260.153144	1618.388711	3470.024064	1161.017895	47.715907	26991.49069	26684.25835	12227.1721	172	14/12/2013	2013-12	Monthly	0	NA	0	1-15 years	35.8	1	1	R1_Dec_2013
389	149	189.5957068	606.3894299	322.0038395	415.3325803	71.53874952	7358.804509	344.7408622	134	263	22/07/2013	2013-07	Monthly	0	NA	0	1-15 years	36.8	1	1	R1_Jul_2013
390	166	68.8162195	198.3823332	112.4976876	737.0667291	150.6078937	132.270742	167.753366	704	70	22/07/2013	2013-07	Monthly	0	NA	0	>15 years	36.8	1	1	R1_Jul_2013
391	158	44.23899825	210.3330761	109.940922	75.81487523	41.41717078	65.424238	2367.015384	418	80.5	22/07/2013	2013-07	Monthly	0	NA	0	>15 years	36.3	1	1	R1_Jul_2013
392	167	68.8162195	194.7971103	115.8013048	98.99793625	38.27950632	6833.988339	3017.678943	30	95	22/07/2013	2013-07	Monthly	0	NA	0	1-15 years	36.7	1	1	R1_Jul_2013
393	168	141.8456769	223.4788934	107.4170391	130.3263971	21.33611828	7949.044917	190.8386916	411	94	22/07/2013	2013-07	Monthly	0	NA	0	1-15 years	36.1	1	1	R1_Jul_2013
394	165	362.1360609	314.2937996	221.733934	5300.23892	130.5996744	11120.02248	7529.953965	1591.758561	260	22/07/2013	2013-07	Monthly	0	NA	0	>15 years	36.6	1	1	R1_Jul_2013
395	169	31.53163591	159.1189048	50.49315622	32.60999374	13.13094553	36.72881755	36.05597196	27.08067657	85.5	22/07/2013	2013-07	Monthly	0	NA	0	1-15 years	36	1	1	R1_Jul_2013
396	155	74.52932123	190.7724008	71.8922594	73.94126488	15.97006888	1959.53205	1109.722692	53.07812608	136	22/07/2013	2013-07	Monthly	0	NA	0	1-15 years	36.2	1	1	R1_Jul_2013
397	170	98.04245707	219.8241886	533.3948979	216.1164746	523.9696867	1453.217416	5869.33785	11386.30154	82	22/07/2013	2013-07	Monthly	1	0	0	>15 years	36.7	1	1	R1_Jul_2013
398	159	124.0296144	178.5993146	92.94303609	87.92974213	29.17970615	779.7986794	364.5814368	41.6755988	102	22/07/2013	2013-07	Monthly	0	NA	0	1-15 years	36.5	1	0	R1_Jul_2013
399	157	731.1841076	386.6359766	229.9548828	5851.948134	3967.98623	12259.16589	15637.8778	7198.602863	243	22/07/2013	2013-07	Monthly	0	NA	0	>15 years	35.8	1	1	R1_Jul_2013
400	164	70.87406535	240.2554692	127.6243095	124.4788518	71.97660851	802.4224683	163.5223249	32.85960674	152	22/07/2013	2013-07	Monthly	0	NA	0	1-15 years	36.3	1	1	R1_Jul_2013
401	163	111.0360357	308.773684	196.1298084	202.3443464	126.4453933	352.3534774	91.4689522	57.30394834	248	22/07/2013	2013-07	Monthly	0	NA	0	1-15 years	36	1	1	R1_Jul_2013
402	153	142.9293651	246.386801	184.8668922	159.968567	173.1329232	150.1834494	37.10532967	36.86687586	189	22/07/2013	2013-07	Monthly	0	NA	0	1-15 years	36.3	1	1	R1_Jul_2013
403	160	51.97431459	154.1414467	96.0010577	58.2666966	40.85158861	61.61372282	27.61326859	20.03634557	96	22/07/2013	2013-07	Monthly	0	NA	0	1-15 years	36.8	1	1	R1_Jul_2013
404	150	68.51159651	289.3315441	102.1182928	68.86064143	36.96096113	69.31543817	34.51658574	24.04361469	134	22/07/2013	2013-07	Monthly	1	0	0	1-15 years	35.9	1	1	R1_Jul_2013
405	161	145.4115749	3317.720926	236.3935306	217.7645373	68	151.767414	3828.842402	1502.804672	132	22/07/2013	2013-07	Monthly	0	NA	0	>15 years	35.3	1	1	R1_Jul_2013
406	171	191.5367519	650.1336421	464.1716817	1172.16386	854.7158682	818.2243192	2670.297374	3513.801153	178	22/07/2013	2013-07	Monthly	0	NA	0	>15 years	36.3	1	1	R1_Jul_2013
407	152	100.0681806	406.4250341	341.1820188	615.3626889	25	637.423139	105.5560743	58.05536811	205	22/07/2013	2013-07	Monthly	0	NA	0	1-15 years	37	1	1	R1_Jul_2013
408	162	235.3165809	705.6063051	645.6012147	544.863401	50	3726.219944	64.59401563	96.20603859	469.5	22/07/2013	2013-07	Monthly	0	NA	0	1-15 years	36.2	1	1	R1_Jul_2013
409	172	36	69	82.74428776	43.58980853	23.10781355	39	38	120.4344341	57	14/12/2013	2013-12	Monthly	0	NA	0	>15 years	36.2	1	1	R1_Dec_2013
410	173	62.5	332.6201862	111.6829417	77.75479359	33.50632965	76	41	54.57185293	123	14/12/2013	2013-12	Monthly	0	NA	0	1-15 years	36.4	1	1	R1_Dec_2013
411	174	95	430.5484331	87.38422548	172.2001299	15.10960138	177.4701417	210.7679377	39	247	14/12/2013	2013-12	Monthly	0	NA	0	1-15 years	36.5	1	1	R1_Dec_2013
412	174	128.2123564	191	319.153862	237.2077995	26	163.6448638	80.34865359	46.44429449	218	22/07/2013	2013-07	Monthly	0	NA	0	1-15 years	36.6	1	1	R1_Jul_2013
413	172	68.79687414	110	84	134.1585096	19	83.14214856	97.67875534	364.9194567	103	22/07/2013	2013-07	Monthly	0	NA	0	>15 years	35.9	1	1	R1_Jul_2013
414	175	243.9161901	426.3320489	916.366696	2527.612838	486.0626527	1144.19433	3377.041737	2312.019389	80	22/07/2013	2013-07	Monthly	0	NA	0	>15 years	35.4	1	1	R1_Jul_2013
415	176	52.56963199	364.5082826	263.5378609	2917.384075	884.5008372	129.8107032	12438.9238	1423.551069	105.5	22/06/2013	2013-06	Monthly	0	NA	0	>15 years	36.6	1	1	NA
416	176	59.96223648	370.0140904	274.1857608	2864.758634	860.3630477	127.1063135	12845.90324	1426.194237	131	22/07/2013	2013-07	Monthly	0	NA	0	>15 years	36.3	1	1	R1_Jul_2013
417	176	1112.090734	644.4463262	251.105193	16190.85822	2852.315613	1439.507976	19411.43757	1125.76105	150	20/09/2013	2013-09	Monthly	0	NA	0	>15 years	36.5	1	1	NA
418	176	339.6491067	432.372392	236.8844539	11076.04962	1717.692023	355.0477269	16324.72176	1198.612498	110	24/10/2013	2013-10	Monthly	0	NA	0	>15 years	35.9	1	1	NA
419	176	111.710468	415.8740105	286.5981099	9768.892442	1440.220353	227.1687306	17255.94009	1333.693373	145.5	20/11/2013	2013-11	Monthly	0	NA	0	>15 years	36.3	1	1	NA
420	176	82.96145048	425.040597	279.5064743	8548.532792	1328.671146	205.5336134	16779.45236	1310.79161	153	12/12/2013	2013-12	Monthly	0	NA	0	>15 years	36.9	1	1	R1_Dec_2013
421	176	325.2745979	234.2905505	211.0820262	2158.18395	786.9520405	769.9783674	9929.389545	680.8632157	80	16/08/2013	2013-08	PCD	1	1	1	>15 years	37.9	1	1	NA
422	177	1596.736197	480.1190559	196.8015781	3.421865862	62.08522125	11342.14464	402.566332	489.3338815	377	12/12/2013	2013-12	Monthly	0	NA	NA	1-15 years	36.3	1	1	R1_Dec_2013
423	178	2063.740131	472.7555755	374.6658335	14.16187842	62.81563561	4462.168	555.9249347	180.878774	247	12/12/2013	2013-12	Monthly	0	NA	NA	1-15 years	36.5	1	1	R1_Dec_2013
424	179	255.1375271	581.2539941	384.3855413	1059.174762	56.24190631	2098.636706	716.7847733	78.64294523	620.5	12/12/2013	2013-12	Monthly	0	NA	NA	1-15 years	36.7	1	1	R1_Dec_2013
425	180	634.4609321	1700.767129	503.7889748	311.0691759	166.0895738	1398.373867	324.1560944	86.41739928	546	12/12/2013	2013-12	Monthly	0	NA	0	1-15 years	36.7	1	1	R1_Dec_2013
426	181	272.7975343	232.9032649	190.6214124	144.3834064	215.9164459	656.2886118	154.3600449	46.71210772	177	12/12/2013	2013-12	Monthly	0	NA	0	1-15 years	36.5	1	1	R1_Dec_2013
427	182	84.5	973.5650337	842.1852255	5421.374867	3723.555213	1843	3956.07452	9316.952602	127.5	12/12/2013	2013-12	Monthly	0	NA	0	>15 years	36.3	1	1	R1_Dec_2013
428	183	80	427.589418	195.677548	136	46	316	4924.199044	125	131	12/12/2013	2013-12	Monthly	0	NA	0	1-15 years	35.3	1	1	R1_Dec_2013
429	184	47	655.8150247	3643.782549	228.0699399	3362.472086	1063.5	1757	2211.556337	65	12/12/2013	2013-12	Monthly	0	NA	0	>15 years	35.8	1	1	R1_Dec_2013
430	177	100.3279324	269.145045	154.3038094	189.5929869	34.06948029	256.1090521	69.60805698	46.5787637	272	22/07/2013	2013-07	Monthly	0	NA	0	1-15 years	36.3	1	1	R1_Jul_2013
431	179	134.6607242	348.198187	267.9341731	1201.030391	91.42974594	1813.753966	570.3865793	50.49159085	281	22/07/2013	2013-07	Monthly	0	NA	0	1-15 years	36.7	1	1	R1_Jul_2013
432	183	102.7673948	256.096591	198.6904631	283.9177216	202.3126293	962.7144191	4466.782919	217.193986	217	22/07/2013	2013-07	Monthly	0	NA	0	1-15 years	36.6	1	1	R1_Jul_2013
433	181	209.5177531	450.8755726	328.7935181	290.6767707	149	913.9037758	337.1492523	72.98389134	189	22/07/2013	2013-07	Monthly	0	NA	0	1-15 years	36.5	1	1	R1_Jul_2013
434	180	297.0774111	550.9329444	321.9084139	297.4819125	59	888.1693013	348.1774989	82.93624016	212.5	22/07/2013	2013-07	Monthly	0	NA	0	1-15 years	35.7	1	1	R1_Jul_2013
435	182	92	1842.697405	2321.534121	13813.28584	10018.61708	11704.5297	8803.685292	22725.88736	186	22/07/2013	2013-07	Monthly	0	NA	0	>15 years	36	1	1	R1_Jul_2013
436	184	60	465.5300755	1054.32754	260	2426.579228	2041.263818	3555.832561	3783.216403	109	22/07/2013	2013-07	Monthly	0	NA	0	>15 years	36.8	1	1	R1_Jul_2013
437	185	223.9188361	1967.542692	420.8933161	140.0120132	48.69577882	216.5035099	82.50626224	35.73826072	667	22/06/2013	2013-06	Monthly	0	NA	0	1-15 years	36.9	1	1	NA
438	185	132.211463	1325.861777	285.3718191	87.86178969	31.94443091	155.8046248	57.54638459	27.56951541	439	22/07/2013	2013-07	Monthly	1	0	0	1-15 years	36.8	1	1	R1_Jul_2013
439	185	128.7724365	1177.345976	288.7143041	92.96344199	30.38616599	150.6111373	56.15972472	28.59060857	402	19/08/2013	2013-08	Monthly	1	2	1	1-15 years	36.1	1	1	NA
440	185	123.8049538	1360.974086	274.0923507	86.72808918	30.38616599	148.6635795	53.38640498	24.50623592	425	19/09/2013	2013-09	Monthly	0	NA	0	1-15 years	36.7	1	1	NA
441	185	128.0082084	1241.394674	252.3751235	95.23084302	31.16529845	149.3127655	57.54638459	26.54842225	387.5	24/10/2013	2013-10	Monthly	0	NA	0	1-15 years	36.3	1	1	NA
442	185	130.6830067	1510.260003	287.8786649	99.76564507	34.28182829	159.3751475	58.23971452	26.29314896	431.5	20/11/2013	2013-11	Monthly	0	NA	0	1-15 years	36.3	1	1	NA
443	185	90.17891694	603.3342294	210.2171016	77.09163482	25.71137122	109.7124233	45.7597757	20.93240985	288	12/12/2013	2013-12	Monthly	0	NA	NA	1-15 years	36.7	1	1	R1_Dec_2013
444	186	156.4236029	96.29706853	5.397784786	58.50149588	21.91243103	1046.053807	110.018128	48.93338815	175	12/12/2013	2013-12	Monthly	0	NA	NA	1-15 years	36.5	1	1	R1_Dec_2013
445	187	225.7764625	128.0537594	8.982521294	131.7890841	73.04143676	242.9754942	6803.956411	1099.253612	123	12/12/2013	2013-12	Monthly	0	NA	NA	>15 years	35.8	1	1	R1_Dec_2013
446	188	61.75948077	98.3751615	12.15644541	64.28735811	15.33870172	114.7254733	35.83923867	97.86677629	157	12/12/2013	2013-12	Monthly	0	NA	NA	1-15 years	36.4	1	1	R1_Dec_2013
447	189	2788.234719	305.8751611	63.92194246	106.0741409	38.71196148	5041.391731	398.3989787	792.5461259	261.5	12/12/2013	2013-12	Monthly	0	NA	NA	1-15 years	36.6	1	1	R1_Dec_2013
448	190	53.65987673	122.4862046	9.234714964	57.21574872	15.33870172	83.01274081	40.006592	51.55481965	127	12/12/2013	2013-12	Monthly	0	NA	NA	1-15 years	36.6	1	1	R1_Dec_2013
449	191	83.02094136	140.4827215	47.87924409	464.1826602	21.91243103	269.5582258	61.67682933	2645.866244	215.5	12/12/2013	2013-12	Monthly	0	NA	NA	>15 years	35	1	1	R1_Dec_2013
450	192	79.98358985	226.95776	7.248510291	75.46691113	17.52994482	174.4200284	40.84006267	37.57385161	184	12/12/2013	2013-12	Monthly	0	NA	NA	1-15 years	36.3	1	1	R1_Dec_2013
451	193	94.15789691	391.8509668	123.7067146	5823.79761	462.2628174	235.9800385	17660.80146	1639.206089	256	12/12/2013	2013-12	Monthly	0	NA	NA	>15 years	36.2	1	1	R1_Dec_2013
452	194	182.747316	1215.09758	59.40710076	190.6782022	32.86864654	245.7736764	833.4706667	66.4095982	285	12/12/2013	2013-12	Monthly	0	NA	NA	1-15 years	36.3	1	1	R1_Dec_2013
453	195	150.1764204	483.5073709	348.848784	396.5230591	90.91218775	412.2695863	82.91339557	36.59115105	305	12/12/2013	2013-12	Monthly	0	NA	0	1-15 years	36.9	1	1	R1_Dec_2013
454	196	221.8202173	256.8331489	332.3052286	200.7281504	66.43582951	216.7200934	59.09784578	40.09455913	394	12/12/2013	2013-12	Monthly	0	NA	0	1-15 years	36.9	1	1	R1_Dec_2013
455	197	185.9983189	1536.936853	183.5430445	99.77715076	47.20440518	118.1096653	45.86698478	28.80579976	208	12/12/2013	2013-12	Monthly	0	NA	0	1-15 years	35	1	1	R1_Dec_2013
456	198	47	159	60	56	21.5	46.5	457	25	65	12/12/2013	2013-12	Monthly	0	NA	0	>15 years	35.8	1	1	R1_Dec_2013
457	199	73	133.5	131.1836988	181.4278517	34.66172033	167.5	541	97.85297767	137	12/12/2013	2013-12	Monthly	0	NA	0	>15 years	36.5	1	1	R1_Dec_2013
458	200	51.5	357.9425678	234.079681	1235.661897	60	292.6702964	403	23	128	12/12/2013	2013-12	Monthly	0	NA	0	1-15 years	35.3	1	1	R1_Dec_2013
459	201	187.2788072	342.1129766	45.82177223	1463.96178	41.5044182	209.4535271	10810.25953	7803.077692	134	22/07/2013	2013-07	Monthly	0	NA	0	>15 years	36.4	1	1	R1_Jul_2013
460	194	79.30684182	200.2389174	54.5044276	137.0801081	19.8738635	150.8859532	690.0712411	43.32908251	148	22/07/2013	2013-07	Monthly	0	NA	0	1-15 years	36.4	1	1	R1_Jul_2013
461	192	62.6054244	203.0571825	97.0204862	197.5770712	35.01564738	117.9325163	32.79075645	25.64652234	109	22/07/2013	2013-07	Monthly	0	NA	0	1-15 years	36.6	1	1	R1_Jul_2013
462	195	49.61184575	178.030527	99.05947572	87.92974213	35.01564738	88.56972655	42.28281753	22.44070704	107	22/07/2013	2013-07	Monthly	0	NA	0	1-15 years	36.9	1	1	R1_Jul_2013
463	202	67.33036209	447.7009015	112.3172659	1433.460628	1297.772757	1694.377378	1484.666171	799.4501884	127	22/07/2013	2013-07	Monthly	0	NA	0	>15 years	36.4	1	1	R1_Jul_2013
464	198	90.95505054	256.6076955	115.3778429	123.9491546	46.68752984	90.49515539	826.2407711	28.0508838	116	22/07/2013	2013-07	Monthly	0	NA	0	>15 years	36.6	1	1	R1_Jul_2013
465	186	192.5412109	240.2554692	160.3151671	100.6424759	56.41409856	1187.026879	115.6305622	30.45524527	169	22/07/2013	2013-07	Monthly	0	NA	0	1-15 years	36.5	1	1	R1_Jul_2013
466	196	275.1874966	520.4711427	463.4854974	313.0365223	43	302.2151114	137.0653502	82.93624016	405	22/07/2013	2013-07	Monthly	0	NA	0	1-15 years	36.8	1	1	R1_Jul_2013
467	187	505.0315988	363.9374562	240.5367596	660.0792071	416.2567147	768.0750867	13993.49521	4692.383639	158	22/07/2013	2013-07	Monthly	0	NA	0	>15 years	36.6	1	1	R1_Jul_2013
468	188	85.99609267	394.4779931	198.3918362	145.8244669	17	130.6519477	53.56576906	1613.939234	114	22/07/2013	2013-07	Monthly	0	NA	0	1-15 years	36.7	1	1	R1_Jul_2013
469	203	105.5406592	422.3511276	252.9633997	281.9273027	36	501.4923246	895.651168	68.00771693	153	22/07/2013	2013-07	Monthly	1	0	0	1-15 years	36.1	1	1	R1_Jul_2013
470	197	83.65074469	399.7880463	86	79.71737525	15	52.78866575	44.11298628	41.46812008	87	22/07/2013	2013-07	Monthly	0	NA	0	1-15 years	36.8	1	1	R1_Jul_2013
471	190	70.36043946	153.5	200.4656298	182.7666652	19	110.8561981	66.16947943	81.27751536	114	22/07/2013	2013-07	Monthly	0	NA	0	1-15 years	36.8	1	1	R1_Jul_2013
472	200	114.1402685	448.2226825	317.7764778	2634.672798	85	356.9833521	886.9861171	49.7617441	189	22/07/2013	2013-07	Monthly	0	NA	0	1-15 years	36.6	1	1	R1_Jul_2013
473	191	78.17826607	389.1675338	257.1045719	1358.677833	24	314.0925612	97.67875534	5716.092744	131	22/07/2013	2013-07	Monthly	0	NA	0	>15 years	36.1	1	1	R1_Jul_2013
474	204	193	434.2857469	1217.628641	8892.397677	1708.742522	15927.63494	8727.421111	10645.20897	154.5	22/07/2013	2013-07	Monthly	0	NA	0	>15 years	36.1	1	1	R1_Jul_2013
475	205	95	744.6823296	445.8232903	2793.125071	2941.752876	1203.575364	16807.79825	245	240	22/07/2013	2013-07	Monthly	0	NA	0	1-15 years	36.6	1	1	R1_Jul_2013
476	206	63.78438178	92.1412262	11.54087036	46.28689784	14.60828735	74.61819399	38.33965067	31.45717809	128	12/12/2013	2013-12	Monthly	0	NA	NA	1-15 years	36.4	1	1	R1_Dec_2013
477	207	92	151	79.67968451	387.931387	170.4942906	5612.5	10371.6185	987.9387168	56	12/12/2013	2013-12	Monthly	0	NA	0	>15 years	36.4	1	1	R1_Dec_2013
478	207	219.7659472	151.047674	62.93349906	493.0046563	645.5543244	10241.14172	10730.08386	1317.204108	108	22/07/2013	2013-07	Monthly	0	NA	0	>15 years	35.9	1	1	R1_Jul_2013
479	206	179.810012	387.8398561	188.0212944	140.9636514	16.5	101.6181816	59.86762424	51.4204689	105	22/07/2013	2013-07	Monthly	0	NA	0	1-15 years	36.7	1	1	R1_Jul_2013
480	208	233.7530155	936.2972352	727.4604098	4415.638486	495.5124905	8644.144017	8701.621487	4895.019829	236	22/07/2013	2013-07	Monthly	0	NA	0	>15 years	36.5	1	1	R1_Jul_2013
481	209	101.6317459	383.8566733	196.3179364	1408.452489	1780.062697	1152.11263	1950.424179	5902.605683	112	22/07/2013	2013-07	Monthly	0	NA	0	>15 years	36	1	1	R1_Jul_2013
482	210	194.1139398	1239.662947	750.9345273	2854.398573	1530.503813	421.9708589	1070.68009	273.6529678	454	23/06/2013	2013-06	Monthly	0	NA	0	1-15 years	35.6	1	0	NA
483	210	306.455472	117.3823495	103.4928933	38.26239228	17.92004661	107.7648655	105.3861501	160.3116266	103	22/07/2013	2013-07	Monthly	1	2	0	1-15 years	39	1	0	R1_Jul_2013
484	210	58.08133633	77.95621686	57.99596485	23.80771075	10.128722	58.42673431	63.09302407	71.47652143	47	20/09/2013	2013-09	Monthly	0	NA	0	1-15 years	36	1	0	NA
485	210	94.00005748	154.1203368	109.3246235	47.04857125	14.0243843	103.220564	119.9460787	113.3413411	91	24/10/2013	2013-10	Monthly	0	NA	0	1-15 years	37.3	1	0	NA
486	210	88.65046072	122.7586403	108.4914838	35.71156613	11.68698692	103.220564	114.3994392	119.9784467	99	21/11/2013	2013-11	Monthly	0	NA	0	1-15 years	36	1	0	NA
487	210	90.94314505	134.4072704	107.2417964	35.14471588	12.46611938	110.0370163	108.1594698	104.9173225	97	13/12/2013	2013-12	Monthly	0	NA	0	1-15 years	35.4	1	0	R1_Dec_2013
488	211	69	177	223.0962482	467.0717379	16.89648221	334	298.2225432	540.1996935	116	23/06/2013	2013-06	Monthly	0	NA	0	1-15 years	35.5	1	1	NA
489	211	107	512.1745773	334.4676296	613.7210192	24.13783173	463	399.5456182	638.3587233	195.5	22/07/2013	2013-07	Monthly	0	NA	0	1-15 years	36.5	1	1	R1_Jul_2013
490	211	84	413.0290804	356.2096631	442.7185738	18.50567099	368	305.4815097	494.6955075	158.5	23/09/2013	2013-09	Monthly	1	2	0	1-15 years	37.5	1	1	NA
491	211	145	722.8926078	544.8195007	853.0329584	28.16080368	695	493.9121835	758.6197862	259	24/10/2013	2013-10	Monthly	0	NA	0	1-15 years	36.8	1	1	NA
492	211	130	651.4970067	528.9880248	648.4788747	26.5516149	606	422.5323456	643.5592017	276.5	21/11/2013	2013-11	Monthly	0	NA	0	1-15 years	35	1	1	NA
493	211	138	611.1929153	482.2998245	624.1028938	26.5516149	593	367.1827255	572.0526237	256	13/12/2013	2013-12	Monthly	0	NA	0	1-15 years	36.3	1	1	R1_Dec_2013
494	212	469	540.6095681	330.2853194	117.2268137	20.11485977	3999	67.14544075	611.0562117	175	23/06/2013	2013-06	Monthly	0	NA	1	1-15 years	35.8	1	1	NA
495	212	943	1137.129267	756.8353568	1088.906908	32.98837002	6507	130.0564843	970.5392809	426	22/07/2013	2013-07	Monthly	0	NA	0	1-15 years	36	1	1	R1_Jul_2013
496	212	770	812.4989582	500.6464105	711.2320061	30.17228966	5030	93.15673762	778.77164	266.5	23/09/2013	2013-09	Monthly	0	NA	0	1-15 years	36	1	1	NA
497	212	652.5	651.4970067	393.8166434	461.6596129	23.33323733	4256.5	78.63880448	646.1594409	211	24/10/2013	2013-10	Monthly	0	NA	0	1-15 years	36	1	1	NA
498	212	642	724.7223776	495.6434096	463.4636345	24.13783173	3911	78.0338906	639.0087831	286	21/11/2013	2013-11	Monthly	0	NA	0	1-15 years	36.7	1	1	NA
499	212	825	1264.416901	835.5978459	726.5833864	37.81593637	4992	110.6992402	834.026723	485	13/12/2013	2013-12	Monthly	0	NA	0	1-15 years	35.2	1	1	R1_Dec_2013
500	211	127	578.2010004	480.6316467	582.577117	23.33323733	513	345.1033689	534.3491553	256	13/12/2013	2013-12	Monthly	0	NA	0	1-15 years	36.3	1	1	R1_Dec_2013
501	213	12502.72162	755.7777003	908.9313601	1261.033742	2981.908475	7167.077532	17212.45435	20711.68625	186	13/12/2013	2013-12	Monthly	0	NA	NA	>15 years	35	1	1	R1_Dec_2013
502	214	1435.631469	2449.342316	788.3181464	318.1130336	1467.029335	8701.116756	707.4100345	302.0716299	611	13/12/2013	2013-12	Monthly	0	NA	0	1-15 years	36	1	0	R1_Dec_2013
503	215	44	561.3921211	84	34	27	45	22	22	84	13/12/2013	2013-12	Monthly	0	NA	0	1-15 years	35.9	1	0	R1_Dec_2013
504	216	57	504.6953596	79	87	28	62	26	33	91	13/12/2013	2013-12	Monthly	0	NA	0	1-15 years	36.2	1	1	R1_Dec_2013
505	217	549	1475.347307	233.3261189	83	42	7698.5	349	3633.386372	134	13/12/2013	2013-12	Monthly	0	NA	0	1-15 years	36	1	1	R1_Dec_2013
506	218	49	582.647897	69	44	27	60	28	25	82	13/12/2013	2013-12	Monthly	0	NA	0	1-15 years	36.6	1	1	R1_Dec_2013
507	219	48	160	181.3339198	100	69	93.5	449.5	4036.695156	50	13/12/2013	2013-12	Monthly	0	NA	0	>15 years	36.2	1	1	R1_Dec_2013
508	220	2270.084585	855.1576389	1105.01293	1314.774793	1065.108636	19643.13213	1616	4789.93677	152	13/12/2013	2013-12	Monthly	0	NA	0	1-15 years	35.5	1	1	R1_Dec_2013
509	221	49	157	200.1597789	61.5	24	74	406	23	76.5	13/12/2013	2013-12	Monthly	0	NA	0	1-15 years	35	1	1	R1_Dec_2013
510	222	38	393.2575721	82.74428776	40.6445512	21.95242287	52	25	45.16291277	59.5	13/12/2013	2013-12	Monthly	0	NA	0	1-15 years	36.6	1	1	R1_Dec_2013
511	223	12	31.37618013	6.495310245	12.03549295	3.662933669	24.44199556	24.46413562	11	10	13/12/2013	2013-12	Monthly	0	NA	0	1-15 years	36.7	1	1	R1_Dec_2013
512	224	13	109.0695786	7.085792995	12.03549295	3.662933669	15.94043189	22.58227904	10	12	13/12/2013	2013-12	Monthly	0	NA	0	1-15 years	36.6	1	1	R1_Dec_2013
513	225	96	288.643276	11.9400516	454.1633513	9.529462501	194.473269	5828.072678	6594.701337	137	13/12/2013	2013-12	Monthly	0	NA	0	>15 years	36	1	1	R1_Dec_2013
514	226	148	2347.802738	487.5358327	3278.632674	1124.997977	494.1533885	2858.540155	209.5	299	13/12/2013	2013-12	Monthly	0	NA	0	1-15 years	35.8	1	1	R1_Dec_2013
515	214	348.3658275	1020.858142	279.8349833	302.2295813	688.8801886	1390.017681	379.7123745	96	368	22/07/2013	2013-07	Monthly	0	NA	0	1-15 years	36.6	1	0	R1_Jul_2013
516	217	236.2468845	902.5779361	573.9435859	284.9771161	120.6094521	655.6085194	68.17025683	69.7264826	717	22/07/2013	2013-07	Monthly	0	NA	0	1-15 years	36.6	1	1	R1_Jul_2013
517	215	86.23011285	338.466481	167.4730376	61.44488005	46.68752984	81.34936841	30.20201252	24.04361469	208	22/07/2013	2013-07	Monthly	0	NA	0	1-15 years	36.3	1	0	R1_Jul_2013
518	221	117.2673991	444.9064097	532.0491461	485.1093933	38	316.7319945	1622.72771	54.73791851	193	22/07/2013	2013-07	Monthly	0	NA	0	1-15 years	36.8	1	1	R1_Jul_2013
519	225	167.3014894	367.2577019	310.8884866	1147.901347	471.5229949	302.2151114	7641.103782	8702.62469	171	22/07/2013	2013-07	Monthly	0	NA	0	>15 years	36.5	1	1	R1_Jul_2013
520	226	301.768107	1990.056187	1159.573147	4445.033242	2766.639648	748.279337	2882.168546	760.5253223	364	22/07/2013	2013-07	Monthly	0	NA	0	1-15 years	35.3	1	1	R1_Jul_2013
521	218	93.81391928	617.090228	235.0123439	209.9872324	23	143.8491142	70.10813892	69.66644173	151	22/07/2013	2013-07	Monthly	0	NA	0	1-15 years	36.6	1	1	R1_Jul_2013
522	224	95.3774846	177	72	151.6574456	15	52.12880743	76.4099941	41.46812008	82.5	22/07/2013	2013-07	Monthly	0	NA	0	1-15 years	35.9	1	1	R1_Jul_2013
523	220	80	183	229.9297669	100	38	2174.138538	78	34	155	22/07/2013	2013-07	Monthly	1	0	0	1-15 years	38	1	1	R1_Jul_2013
524	213	51	190	270.8226521	459.6267771	580.7230614	275.3780434	16877.9326	986	76	22/07/2013	2013-07	Monthly	0	NA	0	>15 years	36	1	1	R1_Jul_2013
525	219	70	545.2443672	464.9655493	250	995.7647561	715.4051966	1323	13337.0367	84	22/07/2013	2013-07	Monthly	0	NA	0	>15 years	36.7	1	1	R1_Jul_2013
526	222	78	513.2013692	217.407083	94	44	292.7095286	58	42	142	22/07/2013	2013-07	Monthly	0	NA	0	1-15 years	36.3	1	1	R1_Jul_2013
527	223	65	396.4515804	184.0031412	103.5	20	1529.985003	206	61.5	107	22/07/2013	2013-07	Monthly	0	NA	0	1-15 years	36.5	1	1	R1_Jul_2013
528	227	49	111	61	40.21649811	11.26432147	69	23.59164134	29.90275078	47	23/06/2013	2013-06	Monthly	0	NA	0	1-15 years	36	1	1	NA
529	227	87	440.582187	228.964045	84.71134709	18.50567099	147	38.10957448	48.10442518	123	22/07/2013	2013-07	Monthly	0	NA	0	1-15 years	36.6	1	1	R1_Jul_2013
530	227	205	997.7791571	687.0904196	449.032016	78.8502503	587	31.75797873	100.1092091	382	19/08/2013	2013-08	Monthly	1	2	0	1-15 years	36.6	1	1	NA
531	227	111.5	458.0274467	181.1643972	56.4742314	13.67810464	85	29.64078015	45.50418598	98	20/09/2013	2013-09	Monthly	0	NA	0	1-15 years	36.3	1	1	NA
532	227	57	149	66	42.78350863	12.06891586	65	21.7768997	28.60263119	53	24/10/2013	2013-10	Monthly	0	NA	0	1-15 years	36.7	1	1	NA
533	227	58	139.5	311.8787988	49.62887001	12.87351025	75	24.80146911	39.00358798	83	21/11/2013	2013-11	Monthly	1	2	0	1-15 years	36.3	1	1	NA
534	228	1138.034158	2136.241574	240.1858265	7530.807347	1673.609204	21607.06878	6341.430584	6104.083486	214.5	13/12/2013	2013-12	Monthly	0	NA	0	>15 years	35.3	1	1	R1_Dec_2013
535	227	64.75497027	139.798918	224.8414685	63.38783695	29.72129215	64.62604326	38.81052558	21.7989836	89	13/12/2013	2013-12	Monthly	0	NA	0	1-15 years	36.3	1	1	R1_Dec_2013
536	229	55	155	73	1413.927283	27	258	813	117.5	80.5	13/12/2013	2013-12	Monthly	0	NA	0	>15 years	35.1	1	1	R1_Dec_2013
537	230	84	149.5	172.3687648	57	38	135.5	31	27	130.5	13/12/2013	2013-12	Monthly	0	NA	0	1-15 years	37.1	1	1	R1_Dec_2013
538	231	367	483.4286148	179.5409129	2508.841498	3340.749208	1859	10480.01393	2827.156997	114	13/12/2013	2013-12	Monthly	0	NA	0	>15 years	35	1	1	R1_Dec_2013
539	232	369	309.9920668	279.3000747	761.7855553	10.5309343	587.670589	1472.552779	99	102	13/12/2013	2013-12	Monthly	0	NA	0	1-15 years	35.4	1	1	R1_Dec_2013
540	233	39	360.2242236	46.35289584	45.36455036	8.0126674	53.13477296	60.21941076	27	75	13/12/2013	2013-12	Monthly	0	NA	0	1-15 years	36.4	1	1	R1_Dec_2013
541	231	151.6658362	418.3699634	250.892616	3697.17611	1539.656647	1600.816289	11894.83212	3350.611732	148.5	22/07/2013	2013-07	Monthly	0	NA	0	>15 years	36.1	1	1	R1_Jul_2013
542	230	408.5	1417.39865	507.3943755	469.6522819	38	4201.922312	73	61.5	357	22/07/2013	2013-07	Monthly	0	NA	0	1-15 years	36.2	1	1	R1_Jul_2013
543	233	49	401.3872221	86	63	17	129.0232791	34	33	100	22/07/2013	2013-07	Monthly	0	NA	0	1-15 years	36.5	1	1	R1_Jul_2013
544	229	69	160.5	199.0367306	2481.325746	38	1292.158511	1448.5	243.5	124	22/07/2013	2013-07	Monthly	0	NA	0	>15 years	35.8	1	1	R1_Jul_2013
545	228	60	486.9025688	78	3514.447602	390.7326978	7972.483214	2947.646486	195	89	22/07/2013	2013-07	Monthly	0	NA	0	>15 years	37	1	1	R1_Jul_2013
546	234	54	373.415609	207.3874423	83	22	2158.732774	36.5	32	127	22/07/2013	2013-07	Monthly	0	NA	0	1-15 years	36.5	1	1	R1_Jul_2013
547	235	134	432.6410583	347.5401687	13089.83167	1089.314452	1272.901305	26708.32614	5774.376337	199	22/07/2013	2013-07	Monthly	0	NA	0	>15 years	36.5	1	1	R1_Jul_2013
548	236	40.24862449	707.4063419	211.0820262	565.6591106	317.3826085	195.8750789	157.6598858	1039.164047	99	19/06/2013	2013-06	Monthly	1	2	0	>15 years	36.5	1	1	NA
549	236	265.3123614	351.2006474	242.2186304	4759.560383	348.729039	234.8955581	405.0823343	132.8737097	182.5	18/07/2013	2013-07	Monthly	1	0	0	>15 years	35.6	1	1	R1_Jul_2013
550	236	126.495677	440.6190194	371.21257	342.4402596	105.7942028	235.6682409	82.8577502	44.90215016	366.5	17/08/2013	2013-08	Monthly	0	NA	0	>15 years	36.3	1	1	NA
551	236	46.81982849	789.4508816	220.8728454	582.1362682	323.2600642	215.5784892	166.8663025	1019.003897	117	17/09/2013	2013-09	Monthly	0	NA	0	>15 years	36.8	1	1	NA
552	236	60.78363698	841.360574	243.9963247	610.2382066	348.729039	258.0760409	182.4021307	1027.709416	144	21/10/2013	2013-10	Monthly	0	NA	0	>15 years	36.6	1	1	NA
553	236	52.56963199	742.0588078	232.4381025	570.5055765	307.586849	220.2145858	161.1122921	1040.996787	131	18/11/2013	2013-11	Monthly	0	NA	0	>15 years	35	1	1	NA
554	236	59.96223648	775.3278274	245.7738314	606.362596	315.4234566	241.849703	173.771115	1031.833083	147	11/12/2013	2013-12	Monthly	0	NA	0	>15 years	35.6	1	1	R1_Dec_2013
555	237	85.42565198	163.4585236	177.2329412	328.3028177	39.18303809	91.17656533	43.73047927	31.15659399	110	19/06/2013	2013-06	Monthly	0	NA	0	1-15 years	36.3	1	1	NA
556	237	82.14004998	332.3822766	115.6058445	250.5468872	37.22388618	107.4029032	62.14331265	27.49111234	83	18/07/2013	2013-07	Monthly	1	2	0	1-15 years	37.6	1	1	R1_Jul_2013
557	237	106.782065	397.9936714	193.2710378	395.8483735	48.97879761	102.7668067	51.78609388	28.40748275	127	17/08/2013	2013-08	Monthly	0	NA	0	1-15 years	36.8	1	1	NA
558	237	69.40834223	194.788074	126.1154667	212.0616287	37.22388618	68.76876538	34.52406258	22.90926028	98	17/09/2013	2013-09	Monthly	0	NA	0	1-15 years	37.1	1	1	NA
559	237	50.92683099	166.1828323	102.8441603	420.1961901	29.38727857	132.9014342	34.52406258	29.32385316	73	21/10/2013	2013-10	Monthly	0	NA	0	1-15 years	36.5	1	1	NA
560	237	75.15814573	347.5291276	208.4111109	621.8639348	56.81540523	137.5375308	36.82566676	24.74200111	128	18/11/2013	2013-11	Monthly	0	NA	0	1-15 years	36.9	1	1	NA
561	237	89.53265448	388.8216615	216.4229856	631.5506985	72.48862046	178.8760583	43.73047927	32.0729644	141	11/12/2013	2013-12	Monthly	0	NA	0	1-15 years	36.3	1	1	R1_Dec_2013
562	238	101.547629	392.3214922	514.3736768	10079.24514	4418.081653	6200	6898.842834	14263.73408	132	19/06/2013	2013-06	Monthly	0	NA	1	>15 years	NA	1	1	NA
563	238	180.3345825	655.5477077	749.1100465	10592.9442	6435.411115	7353.5	10036.69597	16056.49209	274	24/07/2013	2013-07	Monthly	0	NA	0	>15 years	35.5	1	1	R1_Jul_2013
564	238	226.731344	701.6253849	858.6686868	11958.72211	7432.661722	7824	10922.81842	19677.32677	326	22/08/2013	2013-08	Monthly	0	NA	0	>15 years	36.5	1	1	NA
565	238	142.6919269	474.4412791	570.5423681	9382.713691	5079.773943	5885.5	8080.469366	14466.0163	191.5	23/09/2013	2013-09	Monthly	0	NA	0	>15 years	36	1	1	NA
566	238	235.48545	906.4181015	1241.110891	10516.48453	6882.869291	7398	10598.19001	17401.27876	322	25/10/2013	2013-10	Monthly	0	NA	0	>15 years	36	1	1	NA
567	238	247.7411983	943.9518481	1067.84693	11323.20646	7524.711968	7387	11819.38041	18499.64723	350	15/12/2013	2013-12	Monthly	0	NA	0	>15 years	35.1	1	1	R1_Dec_2013
568	239	132.6310161	214.9600333	111.1328405	49.31327636	56.97232067	346.974602	2379.314608	216.7050046	326.5	12/12/2013	2013-12	Monthly	0	NA	NA	>15 years	35	1	1	R1_Dec_2013
569	240	76.94623834	1402.737559	141.8272165	119.2530493	82.53682354	468.695531	272.544908	179.5680583	229	12/12/2013	2013-12	Monthly	0	NA	NA	>15 years	35.7	1	1	R1_Dec_2013
570	241	96.18279792	206.6170605	28.86506138	87.43080704	148.8602441	152.9672977	50.00824	103.5465446	223	12/12/2013	2013-12	Monthly	0	NA	NA	1-15 years	36.3	1	1	R1_Dec_2013
571	242	77.95868884	116.0437187	6.268909598	53.38096705	70.11977929	393.1446096	291.7147333	76.02151373	126	15/12/2013	2013-12	Monthly	0	NA	NA	>15 years	36.2	1	1	R1_Dec_2013
572	243	1299.232701	213.4351288	195.9305555	247.6821037	347.9139493	226.1911514	404.8643464	2730.860275	201	17/12/2013	2013-12	Monthly	0	NA	0	>15 years	36.6	1	1	R1_Dec_2013
573	244	88	554.3061915	224.3626108	169	122	8173	7796.29176	428	161	11/12/2013	2013-12	Monthly	0	NA	0	>15 years	35.7	1	1	R1_Dec_2013
574	245	51	161	51	37	18	336	22	26	54	11/12/2013	2013-12	Monthly	0	NA	0	1-15 years	36.4	1	1	R1_Dec_2013
575	246	58	419.6107489	71	57	23	71	25	25	71.5	11/12/2013	2013-12	Monthly	0	NA	0	1-15 years	36.4	1	0	R1_Dec_2013
576	247	37	105.5	108.7934154	41.23360266	25.41859491	153	24	84.68046144	72.5	11/12/2013	2013-12	Monthly	0	NA	0	1-15 years	35.8	1	1	R1_Dec_2013
577	248	42	151	581.9509859	115.4540875	221.8350101	2901	718	400.8208508	71	11/12/2013	2013-12	Monthly	0	NA	0	>15 years	35.8	1	1	R1_Dec_2013
578	249	44	576.7994862	93.47039914	71.86427893	33.50632965	52	174.5	118.552646	78	11/12/2013	2013-12	Monthly	0	NA	0	>15 years	35.8	1	1	R1_Dec_2013
579	250	59	251.0094411	41.33379247	60.17746476	6.181200566	53.13477296	48.92827124	22	58.5	11/12/2013	2013-12	Monthly	0	NA	0	1-15 years	36.5	1	1	R1_Dec_2013
580	240	79.72551275	1029.391036	153.6111299	257.4195172	162.6320371	463.3392271	524.0821835	171	127	18/07/2013	2013-07	Monthly	0	NA	0	>15 years	36.8	1	1	R1_Jul_2013
581	236	84.05842105	838.209523	157.0965989	584.258769	280.7338736	309.7986621	350.0473452	1037	182.5	18/07/2013	2013-07	Monthly	1	0	0	>15 years	35.6	1	1	R1_Jul_2013
582	251	152.5183722	287.5748141	173.3654964	473.8425928	1263.742839	747.321334	7759.854062	3768.627246	192	18/07/2013	2013-07	Monthly	0	NA	0	>15 years	35.8	1	1	R1_Jul_2013
583	244	161.1841888	467.9047961	188.4774633	514.8390344	606.0345362	15875.20512	7800.217861	847	193	18/07/2013	2013-07	Monthly	1	0	0	>15 years	37	1	1	R1_Jul_2013
584	250	152.5183722	230.7757268	101.1987404	263.1399509	32.91362656	105.9837528	65.26306436	29	98	18/07/2013	2013-07	Monthly	0	NA	0	1-15 years	35.8	1	1	R1_Jul_2013
585	245	69.32653283	367.3984479	90.6081745	131.5699755	28.07338736	58.42694065	57.3523899	30	92	18/07/2013	2013-07	Monthly	0	NA	0	1-15 years	36	1	1	R1_Jul_2013
586	252	133.4535757	254.9413318	102.9638347	118.2222968	50.33848767	3486.593714	417.2880782	135.5	100	18/07/2013	2013-07	Monthly	0	NA	0	1-15 years	37	1	1	R1_Jul_2013
587	239	192.3811286	418.8442206	272.264727	729.0556413	177.1527547	457.9041628	5274.860961	349.5	264.5	18/07/2013	2013-07	Monthly	0	NA	0	>15 years	35.2	1	1	R1_Jul_2013
588	246	192.3811286	743.3765225	255.9626348	513.6899828	102.613071	456.5453967	88.99508777	34	206	18/07/2013	2013-07	Monthly	0	NA	0	1-15 years	36.5	1	0	R1_Jul_2013
589	253	192.3811286	605.5479012	251.3056584	759.470992	90.99649695	988.5023099	3480.696766	576	192.5	18/07/2013	2013-07	Monthly	0	NA	0	>15 years	36.3	1	1	R1_Jul_2013
590	243	2049.39574	518.8176372	246.6490187	596.4266819	560.3046858	436.8432888	1903.506044	9349.792906	276	18/07/2013	2013-07	Monthly	0	NA	0	>15 years	36.6	1	1	R1_Jul_2013
591	248	38.22016473	105.4013989	460.2149894	103.1385849	227.8577142	5125.159054	958.4879212	302.2203505	80	18/07/2013	2013-07	Monthly	0	NA	0	>15 years	36.5	1	1	R1_Jul_2013
592	254	74.35919645	305.1222076	185.6529057	93	16	134.7229361	375.9511458	44	105	24/07/2013	2013-07	Monthly	0	NA	0	1-15 years	36.4	1	1	R1_Jul_2013
593	255	71	347.0827824	72	45	18	82.80598507	28	26	79.5	18/07/2013	2013-07	Monthly	0	NA	0	1-15 years	35.8	1	1	R1_Jul_2013
594	241	59	187	214.06735	97	188.5	213.7549847	36	76	139	18/07/2013	2013-07	Monthly	0	NA	0	1-15 years	36.8	1	1	R1_Jul_2013
595	249	114	1259.205422	580.5494537	1879.634566	486.1659087	1039.889115	5098.579781	3351.717916	245	18/07/2013	2013-07	Monthly	0	NA	0	>15 years	36.5	1	1	R1_Jul_2013
596	256	60	439.2196624	746.5481692	934.2070671	80	668.2250423	12169.06576	2237.020379	106	18/07/2013	2013-07	Monthly	0	NA	0	>15 years	36	1	1	R1_Jul_2013
597	257	59.5	881.352886	12.40678494	1589.848064	5.239533313	3156.205514	15270.06218	4569.381742	123.5	14/12/2013	2013-12	Monthly	0	NA	0	>15 years	36.5	1	1	R1_Dec_2013
598	258	393.4280738	3031.445752	173.3654964	316.5306656	60.01896607	298.9285336	150.3028149	35	165	23/07/2013	2013-07	Monthly	0	NA	0	1-15 years	36	1	1	R1_Jul_2013
599	259	1860.486977	648.939253	364.9452656	244.2363561	2741.385135	1132.38318	232.4087123	2318.382111	111	23/06/2013	2013-06	Monthly	1	2	0	>15 years	36.1	1	1	NA
600	259	1077.275217	472.5607719	316.8694511	188.4109033	1694.363071	735.9278266	190.1525828	5403.479369	127	23/07/2013	2013-07	Monthly	0	NA	1	>15 years	36	1	1	R1_Jul_2013
601	259	69.20112574	266.0468479	84	95.94999703	14	93.96113107	63.38419428	59.34866995	96	19/08/2013	2013-08	Monthly	0	NA	0	>15 years	35.4	1	1	NA
602	259	1390.011074	1464.020353	6264.041683	408.2236237	10770.94683	19232.23555	2828.839481	28032.42243	201.5	20/09/2013	2013-09	Monthly	0	NA	0	>15 years	35.5	1	1	NA
603	259	652.087531	591.7654647	4186.511332	230.2799929	5219.084439	11414.76192	736.2317951	14490.94503	162	21/11/2013	2013-11	Monthly	0	NA	0	>15 years	36.4	1	1	NA
604	259	690.6804666	566.5844021	3841.816697	197.1336303	4446.610357	9347.617039	614.3391138	12814.45662	138	14/12/2013	2013-12	Monthly	0	NA	0	>15 years	36	1	1	R1_Dec_2013
605	260	78.5	510.0115827	175.9548631	113.5	26	114	34	40	120	14/12/2013	2013-12	Monthly	0	NA	0	1-15 years	36.1	1	1	R1_Dec_2013
606	261	96	170	86	948.6787402	1139.50992	343	14786.55234	680.5	94	14/12/2013	2013-12	Monthly	0	NA	0	>15 years	35.9	1	1	R1_Dec_2013
607	262	29	154	41	25.5	15	27	22.5	19	39	14/12/2013	2013-12	Monthly	0	NA	0	1-15 years	36.4	1	1	R1_Dec_2013
608	263	48.5	162	102.6642089	57.72704373	24.26320423	53	30	47.0447008	76	14/12/2013	2013-12	Monthly	0	NA	0	1-15 years	36.6	1	1	R1_Dec_2013
609	264	52	285.3738288	43.10524072	54.62262186	6.868000629	107.3322414	56.45569759	27	72	14/12/2013	2013-12	Monthly	0	NA	0	1-15 years	36.8	1	1	R1_Dec_2013
610	265	461	475.7562669	4.410614543	148.129144	18.31466834	5513.264043	5710.444192	3579.558603	156	14/12/2013	2013-12	Monthly	0	NA	0	1-15 years	36.3	1	1	R1_Dec_2013
611	260	478.3530765	1227.714863	438.4482169	978.3246548	304.9350696	754.1151643	124.5931229	93	366	23/07/2013	2013-07	Monthly	0	NA	0	1-15 years	36.3	1	1	R1_Jul_2013
612	261	247.8423549	285.1571124	114.1260441	1693.467903	1896.802417	556.4147023	17239.17305	1225.5	105	23/07/2013	2013-07	Monthly	0	NA	0	>15 years	36.3	1	1	R1_Jul_2013
613	262	44.88690806	296.4933607	70.77307418	45.55396279	29.17970615	47.17300653	29.33909788	34.46251439	74	23/07/2013	2013-07	Monthly	0	NA	0	1-15 years	36.4	1	1	R1_Jul_2013
614	265	81.50517516	469.2759181	256.1237244	276.5019602	38.90627487	318.1771155	44.87156146	31.2566991	293	23/07/2013	2013-07	Monthly	0	NA	0	1-15 years	36.1	1	1	R1_Jul_2013
615	266	142.9293651	357.9322557	223.8013854	349.3520455	62.25003979	248.3803201	67.30734218	56.90322143	245	23/07/2013	2013-07	Monthly	0	NA	0	>15 years	36	1	1	R1_Jul_2013
616	259	662.6725111	304.6798317	149.5829663	105.4097511	1312.561041	424.0757016	81.11397648	2009.830938	127	23/07/2013	2013-07	Monthly	0	NA	1	>15 years	36	1	1	R1_Jul_2013
617	264	56	136.5	76	65	16	242.6407935	36	162	84	23/07/2013	2013-07	Monthly	0	NA	0	1-15 years	36.3	1	1	R1_Jul_2013
618	267	62	1064.678925	19.47188534	80.54522207	32.50853631	432.5170519	438.4725846	126	171	14/12/2013	2013-12	Monthly	0	NA	0	>15 years	36.3	1	1	R1_Dec_2013
619	268	66	382.8285449	9.651863479	80.54522207	10.98880101	121.1472824	394.2489548	29	119	14/12/2013	2013-12	Monthly	0	NA	0	1-15 years	36	1	1	R1_Dec_2013
620	269	75.59900305	193.3877929	99.56925078	85.81095317	29.17970615	131.8918754	44.87156146	29.65379145	107	23/07/2013	2013-07	Monthly	1	2	0	1-15 years	37.9	1	1	R1_Jul_2013
621	267	57.88048671	600.5023269	115.3778429	82.63276972	79.75786348	218.5361731	104.4126719	61.71194437	133	23/07/2013	2013-07	Monthly	0	NA	0	>15 years	35.3	1	1	R1_Jul_2013
622	270	16680.18177	1045.979021	202.8490831	93	795.3731164	2758	652	2579.244782	113	14/12/2013	2013-12	Monthly	0	NA	0	1-15 years	35.1	1	1	R1_Dec_2013
623	271	175.5	615.1092514	297.9126924	1229.552691	234.5443075	4914.5	13234.5937	1545.888868	273	14/12/2013	2013-12	Monthly	0	NA	0	>15 years	35.1	1	1	R1_Dec_2013
624	270	57.88048671	387.6614936	82.39253412	78.39519178	40.85158861	65.4645805	34.51658574	24.84506851	99	23/07/2013	2013-07	Monthly	0	NA	0	1-15 years	35.6	1	1	R1_Jul_2013
625	271	190.178742	366.1312057	250.4771946	1509.849913	576.5771827	7853.824231	13959.77116	883.3822511	291.5	23/07/2013	2013-07	Monthly	0	NA	0	>15 years	35.9	1	1	R1_Jul_2013
626	272	53	176	84	61	25	393	28	68	88.5	13/12/2013	2013-12	Monthly	0	NA	0	1-15 years	36.6	1	1	R1_Dec_2013
627	273	81	432.9083039	185.8163847	72.5	39	76.5	30	25	139	14/12/2013	2013-12	Monthly	0	NA	0	1-15 years	35.3	1	1	R1_Dec_2013
628	274	37	545.6740172	93.47039914	55.95988933	26.57398558	377	38	52.6900649	69.5	14/12/2013	2013-12	Monthly	0	NA	0	1-15 years	36.3	1	1	R1_Dec_2013
629	275	73	353.9452283	8.802501155	1124.080256	5863.834547	10069.93761	12637.69808	17956.3849	117	14/12/2013	2013-12	Monthly	0	NA	0	>15 years	35.8	1	1	R1_Dec_2013
630	276	366.5640423	276.695677	104.8397256	3561.738879	269.1172995	201.0973771	579.4569048	100	114	23/07/2013	2013-07	Monthly	0	NA	0	>15 years	36.3	1	1	R1_Jul_2013
631	273	154.2515355	516.3926394	189.6401328	278.3944408	75.50773151	142.6704365	102.8387681	34	225.5	23/07/2013	2013-07	Monthly	0	NA	0	1-15 years	35.7	1	1	R1_Jul_2013
632	277	177.1851634	1957.828293	215.5989991	167.3843284	196.4766881	295.5533267	324.0244486	28.85233763	262	23/07/2013	2013-07	Monthly	0	NA	0	1-15 years	36.1	1	1	R1_Jul_2013
633	274	35.43703268	194.5253681	61.26624332	43.43517383	46.68752984	681.6018087	37.96824431	17.63198411	58	23/07/2013	2013-07	Monthly	0	NA	0	1-15 years	36.8	1	1	R1_Jul_2013
634	275	153.5604749	361.0066645	240.2139824	1509.849913	7171.694242	10524.38825	11403.54385	16900.95123	210	23/07/2013	2013-07	Monthly	0	NA	0	>15 years	36	1	1	R1_Jul_2013
635	278	176.003929	1130.568832	282.3195909	163.6764477	62.25003979	170.4004522	62.99276897	40.07269115	402	23/07/2013	2013-07	Monthly	0	NA	0	1-15 years	36.5	1	1	R1_Jul_2013
636	272	42	176	171.4728911	67	27	1614.716709	42	56	108	23/07/2013	2013-07	Monthly	0	NA	0	1-15 years	36.6	1	1	R1_Jul_2013
637	279	95.06580742	203.4261742	217.7603677	221.8574293	400.7842301	1239.594364	12975.89231	868.078234	177.5	15/12/2013	2013-12	Monthly	0	NA	0	>15 years	35.1	1	1	R1_Dec_2013
638	280	807.6541074	3118.632205	1615.720363	2005.148595	402.581946	5149.723374	8704.556206	3434.984223	579	23/07/2013	2013-07	Monthly	0	NA	0	>15 years	35.3	1	1	R1_Jul_2013
639	279	54.33678344	164.9484116	127.1139059	119.7115766	361.8283563	815.4191129	10922.39506	935.2966114	118	23/07/2013	2013-07	Monthly	0	NA	0	>15 years	35.9	1	1	R1_Jul_2013
640	281	41.5	1009.20615	88	68	20	109.7660732	32	46	106	23/07/2013	2013-07	Monthly	0	NA	0	1-15 years	35.9	1	1	R1_Jul_2013
641	282	1798.010131	193.4193371	4105.935137	225.3789758	5791.620409	3571.146011	3960.145617	16287.64126	189	15/12/2013	2013-12	Monthly	0	NA	0	>15 years	36.6	1	1	R1_Dec_2013
642	283	442.8232284	279.1131479	165.2303454	398.5235489	60.01896607	199.059228	14046.5041	15897.44614	135	23/07/2013	2013-07	Monthly	0	NA	0	>15 years	36	1	1	R1_Jul_2013
643	282	2488.526892	238.2118922	5531.845408	208.7007133	6429.970765	4086.722709	3891.976863	22908.98594	165	23/07/2013	2013-07	Monthly	0	NA	0	>15 years	35	1	1	R1_Jul_2013
644	284	32	190	68	50	16	75.10310274	28	45	77.5	23/07/2013	2013-07	Monthly	0	NA	0	1-15 years	35.8	1	1	R1_Jul_2013
645	285	259.0733292	621.3651634	472.0018418	150.3117836	42.0731529	2118.942898	149.7592659	43.90700602	597	23/06/2013	2013-06	Monthly	1	0	0	1-15 years	37.5	1	1	NA
646	285	8148.152739	912.6257348	869.7934114	247.3652643	83.36717335	25726.95561	16997.36028	8248.188494	444	23/07/2013	2013-07	Monthly	0	NA	0	1-15 years	36.8	1	1	R1_Jul_2013
647	285	1339.169951	506.381748	538.2563814	27.58636969	40.51488798	21124.74184	4187.637859	14.30356354	472	22/08/2013	2013-08	Monthly	1	2	0	1-15 years	37.3	1	1	NA
648	285	385.9351954	310.2524763	298.3250153	121.8728051	22.59484137	8236.206298	466.6110461	114.3624343	299.5	23/09/2013	2013-09	Monthly	0	NA	0	1-15 years	37	1	1	NA
649	285	307.9839282	317.9502168	255.2981197	121.0225297	22.59484137	3643.880663	156.3459003	54.11793766	288.5	25/10/2013	2013-10	Monthly	0	NA	0	1-15 years	35.9	1	1	NA
650	285	148.2602533	180.8158845	183.5192355	69.7225815	14.80351676	1678.145647	72.45297819	35.22771413	192	22/11/2013	2013-11	Monthly	0	NA	0	1-15 years	36	1	1	NA
651	285	12859.60356	5508.136633	4727.88415	1450.811533	640.4627251	21861.15178	12505.4179	6550.632276	474	15/12/2013	2013-12	Monthly	0	NA	1	1-15 years	37.1	1	1	R1_Dec_2013
652	286	1719.103713	1347.4098	902.3706146	10098.24164	3491.717604	17456.54298	23937.18683	2444.341104	827	17/12/2013	2013-12	Monthly	0	NA	0	>15 years	36	1	1	R1_Dec_2013
653	287	3688.063978	390.6718255	348.848784	2189.342981	4140.588709	8442.612583	14728.03851	7002.983878	192	15/12/2013	2013-12	Monthly	0	NA	0	>15 years	35	1	1	R1_Dec_2013
654	288	67.51050092	133.1418267	124.5780251	66.90938345	55.94596169	325.3587006	359.4383903	129.2368314	114	15/12/2013	2013-12	Monthly	0	NA	0	1-15 years	36.8	1	1	R1_Dec_2013
655	289	287.9529529	398.4952963	260.2556096	234.7697665	97.90543297	259.6184152	1269.721627	179.0630796	220	15/12/2013	2013-12	Monthly	0	NA	0	1-15 years	36.9	1	1	R1_Dec_2013
656	290	208.7314467	246.8143484	762.2004277	364.1513043	113.6402347	1579.995334	4028.679581	91.86714518	221	15/12/2013	2013-12	Monthly	0	NA	0	1-15 years	37.1	1	1	R1_Dec_2013
657	291	611.7278043	4529.931823	1039.175947	3814.282668	923.3688284	1425.672799	6250.344153	28174.87995	245	15/12/2013	2013-12	Monthly	0	NA	0	>15 years	35.4	1	1	R1_Dec_2013
658	292	175.6650789	165.6331931	174.1060865	72.77862761	330.4308363	789.9976668	142.8932987	72.40376697	109.5	15/12/2013	2013-12	Monthly	0	NA	0	1-15 years	36.2	1	1	R1_Dec_2013
659	293	106	1442.768311	193.8846355	1395.90101	921.873916	3529.5	5712.788473	30468.35993	79	14/12/2013	2013-12	Monthly	0	NA	0	>15 years	36.1	1	1	R1_Dec_2013
660	294	96	456.8410369	86	497.7124216	26	132.5	8434.948987	145	90	15/12/2013	2013-12	Monthly	0	NA	0	1-15 years	36.5	1	1	R1_Dec_2013
661	292	306.7699078	415.8169649	198.942595	154.4517103	667.6715961	1199.790433	579.4569048	161.5	91	23/07/2013	2013-07	Monthly	0	NA	0	1-15 years	35.9	1	1	R1_Jul_2013
662	288	49.61184575	128.5460035	88.20226409	47.67275176	57.38675543	245.4921769	351.2062599	135.4456961	82.5	23/07/2013	2013-07	Monthly	0	NA	0	1-15 years	36.5	1	1	R1_Jul_2013
663	286	868.7979178	726.4488031	380.1577326	6030.545352	2115.866475	10147.44305	13995.44847	1299.290614	428	23/07/2013	2013-07	Monthly	0	NA	0	>15 years	36.8	1	1	R1_Jul_2013
664	295	613	718.4400465	505.7309434	439.5733921	38	1004.263284	48	42	289	23/07/2013	2013-07	Monthly	0	NA	0	1-15 years	36.8	1	1	R1_Jul_2013
665	290	105	428.5292274	1029.55367	491.3715172	58	3480.739954	5389.958081	127	179	23/07/2013	2013-07	Monthly	0	NA	0	1-15 years	36	1	1	R1_Jul_2013
666	294	83	338.8524613	60	726.7162403	38	286.9323669	7415.571348	143	69.5	23/07/2013	2013-07	Monthly	0	NA	0	1-15 years	36	1	1	R1_Jul_2013
667	289	96.5	502.5182544	297.5160888	179	31	356.2583079	49	78	165	23/07/2013	2013-07	Monthly	0	NA	0	1-15 years	36.3	1	1	R1_Jul_2013
668	293	231	2081.024819	284.170574	2901.560034	2088.458389	12888.84786	8216.973666	36129.32193	103	23/07/2013	2013-07	Monthly	0	NA	0	>15 years	35.6	1	1	R1_Jul_2013
669	296	273.5936632	170.2492092	163.0862295	40.81321844	33.50269583	54.53161869	22.87988785	13.27421112	78	23/06/2013	2013-06	Monthly	NA	NA	NA	1-15 years	37.1	1	1	NA
670	296	23.6910714	120.5185192	58.96256427	19.83975896	9.349589534	28.56418122	22.53322288	11.74257138	66	24/07/2013	2013-07	Monthly	0	NA	0	1-15 years	36	1	1	R1_Jul_2013
671	296	101.6423386	196.1820729	146.8278196	61.21982765	31.16529845	93.4827749	32.58650694	19.91131668	141	23/08/2013	2013-08	Monthly	0	NA	0	1-15 years	36.8	1	1	NA
672	296	1207.190227	228.204774	1021.452665	61.50325278	98.94982257	2666.855828	148.719271	1463.324242	118	29/10/2013	2013-10	Monthly	0	NA	0	1-15 years	36.7	1	1	NA
673	296	859.9375488	309.3972374	1621.213585	82.47671226	77.13411366	2252.675201	94.29287113	559.8821942	139	25/11/2013	2013-11	Monthly	0	NA	0	1-15 years	35.3	1	1	NA
674	296	61.13824877	134.4072704	106.8252398	37.4121169	16.36178169	54.53161869	20.79989804	14.29530429	83	15/09/2013	2013-09	PCD	1	1	1	1-15 years	38.8	1	1	NA
675	297	61.31055696	158.4112452	332.8960209	144.3834064	44.58193823	283.0174998	212.5758333	39.70529156	134.5	15/12/2013	2013-12	Monthly	0	NA	0	>15 years	36.5	1	1	R1_Dec_2013
676	296	811.5037764	249.0405418	887.51228	126.1887495	117.1368573	1547.682312	67.91841977	777.367326	140	15/12/2013	2013-12	Monthly	0	NA	0	1-15 years	36.1	1	1	R1_Dec_2013
677	298	87	609.493111	6.062130769	118.0404116	17.39893493	1217.848996	182.5400889	94	117.5	15/12/2013	2013-12	Monthly	0	NA	0	1-15 years	36.3	1	1	R1_Dec_2013
678	298	123.0306705	619.7689815	258.7642344	185.5	36	2125.927932	188.782335	53	163	24/07/2013	2013-07	Monthly	0	NA	0	1-15 years	36.7	1	1	R1_Jul_2013
679	299	34	105	122.9411471	51	32.60629172	42	21	50	93	20/06/2013	2013-06	Monthly	0	NA	0	1-15 years	36.5	1	1	NA
680	299	39	136.5	168.0156244	58	44.01849383	52	26	69.5	115.5	17/08/2013	2013-08	Monthly	0	NA	1	1-15 years	37.1	1	1	NA
681	299	40	126	177.8507807	76	39.12755007	49	23	64	126	17/09/2013	2013-09	Monthly	0	NA	0	1-15 years	36.3	1	1	NA
682	299	45	150.5	213.0965248	78	34.23660631	56	26	70	153	21/10/2013	2013-10	Monthly	1	0	0	1-15 years	36.8	1	1	NA
683	299	56	160	283.6083839	85	44.01849383	67	25	75	195	18/11/2013	2013-11	Monthly	0	NA	0	1-15 years	36	1	1	NA
684	299	45	129	181.9488619	62	40.75786466	55	22	64.5	140	11/12/2013	2013-12	Monthly	0	NA	0	1-15 years	36.8	1	1	R1_Dec_2013
685	300	561.4038047	1313.107832	746.086929	5077.571529	5658.911376	5496.562715	22339.95255	4624.553337	687	12/12/2013	2013-12	Monthly	0	NA	NA	>15 years	36	1	1	R1_Dec_2013
686	301	2543.768802	3190.866588	8860.739549	11347.30025	2929.903583	1606.156626	12737.44113	31461.23412	383	12/12/2013	2013-12	Monthly	0	NA	NA	>15 years	35	1	1	R1_Dec_2013
687	302	397.8930482	364.0457285	122.1974327	5594.902692	3544.788069	11718.8328	25477.33045	4400.172144	252	12/12/2013	2013-12	Monthly	0	NA	NA	>15 years	35.8	1	1	R1_Dec_2013
688	303	96.44357274	145.5049963	165.8495549	116.2110344	40.21115997	100.2817913	40.13361168	23.35605386	161	11/12/2013	2013-12	Monthly	0	NA	0	1-15 years	36.6	1	1	R1_Dec_2013
689	304	66	164	76	56	27	65	28	59	92	11/12/2013	2013-12	Monthly	0	NA	0	1-15 years	36.5	1	1	R1_Dec_2013
690	305	38	104	52	42	17	186.5	290	24	53	11/12/2013	2013-12	Monthly	0	NA	0	1-15 years	36.5	1	1	R1_Dec_2013
691	306	42	145	155.3341234	43	22	43	21	30	77.5	11/12/2013	2013-12	Monthly	0	NA	0	1-15 years	35.2	1	1	R1_Dec_2013
692	307	71	340.5984254	100.1603504	65.97376426	40.43867371	74	35	52.6900649	118	11/12/2013	2013-12	Monthly	0	NA	0	1-15 years	35	1	1	R1_Dec_2013
693	308	134	264.4563754	6.694873579	126.8355796	20.60400189	273.112733	7004.928382	945	68	11/12/2013	2013-12	Monthly	0	NA	0	>15 years	36.8	1	1	R1_Dec_2013
694	304	97.05714596	196.5174586	89.43144496	171.6130115	32.91362656	89.67856007	53.39705266	49	79	18/07/2013	2013-07	Monthly	0	NA	0	1-15 years	36.3	1	1	R1_Jul_2013
695	309	97.05714596	205.4500704	94.13836312	710.8052457	570.9086158	135.8766062	3244.365366	519	92	18/07/2013	2013-07	Monthly	0	NA	0	>15 years	35.9	1	1	R1_Jul_2013
696	310	62.39387954	432.7713233	71.78050188	85.80650574	29.0414352	60.46508975	53.39705266	26	66	18/07/2013	2013-07	Monthly	0	NA	0	1-15 years	36.6	1	1	R1_Jul_2013
697	306	246.1091915	391.6036353	572.3428129	295.555742	65.82725311	171.2045238	72.18490452	72	457	18/07/2013	2013-07	Monthly	0	NA	0	1-15 years	36.5	1	1	R1_Jul_2013
698	311	110.9224525	271.8609306	114.1260441	169.7062002	65.82725311	4111.626103	397.511392	178	106	18/07/2013	2013-07	Monthly	0	NA	0	1-15 years	36.5	1	1	R1_Jul_2013
699	302	602.2742539	717.8606756	300.2210086	8269.37859	4982.86516	16734.90251	24037.52353	8902.931908	196	18/07/2013	2013-07	Monthly	0	NA	0	>15 years	36.6	1	1	R1_Jul_2013
700	301	67.59336951	224.735256	223.3711833	615.8956061	120.0379321	169.1663747	2576.902208	8474.293906	105	18/07/2013	2013-07	Monthly	0	NA	0	>15 years	35.8	1	1	R1_Jul_2013
701	300	232.243885	464.2694179	258.2912498	2453.288937	2494.4711	3846.666721	13660.69813	3674.607309	158	18/07/2013	2013-07	Monthly	0	NA	0	>15 years	36	1	1	R1_Jul_2013
702	312	138.5480972	489.7801825	40.45036297	48.53580464	13.48583595	1894.512116	43.06685539	42.24585545	138	18/07/2013	2013-07	Monthly	0	NA	0	1-15 years	36	1	1	R1_Jul_2013
703	313	2593.230284	632.9541206	2485.140366	1116.891804	769.2051888	14141.06944	1393.497727	28464.89238	174	19/07/2013	2013-07	Monthly	0	NA	0	>15 years	35.5	1	1	R1_Jul_2013
704	308	229.8441022	123.5	192.1698221	270.2613454	40	348.405194	6420.826404	1824.597284	71	19/07/2013	2013-07	Monthly	0	NA	0	>15 years	36.5	1	1	R1_Jul_2013
705	314	181	689.9491625	438.9106888	212.8517223	27.35620929	2706	360.5286729	54.60502317	248	23/06/2013	2013-06	Monthly	0	NA	1	1-15 years	36.5	1	1	NA
706	314	152	618.5225178	465.615755	219.9072344	24.13783173	1911	256.4834854	53.30490357	263.5	23/08/2013	2013-08	Monthly	0	NA	0	1-15 years	35.5	1	1	NA
707	314	150	567.2005353	643.8675623	192.9536239	19.71256258	1815.5	251.6441743	43.55400658	203	23/09/2013	2013-09	Monthly	0	NA	0	1-15 years	36.3	1	1	NA
708	314	141.5	585.5337667	668.8082216	193.381459	22.52864294	1721	275.8407296	48.10442518	239	30/10/2013	2013-10	Monthly	0	NA	0	1-15 years	36.6	1	1	NA
709	314	190	810.6713233	760.9838303	236.7317375	30.57458685	2593.5	330.2829788	61.10562117	325	25/11/2013	2013-11	Monthly	0	NA	0	1-15 years	35	1	1	NA
710	314	144	662.4853264	560.6463047	217.3402239	23.33323733	1824	227.4476191	52.00478397	270	15/12/2013	2013-12	Monthly	0	NA	0	1-15 years	36	1	1	R1_Dec_2013
711	315	165.331839	395.1421493	117.5047414	732.1849657	209.7973564	8404.728351	624.4966389	2374.925202	111	15/12/2013	2013-12	Monthly	0	NA	0	>15 years	36	1	1	R1_Dec_2013
712	316	148.7986551	486.8657254	321.0808637	1052.846428	188.8176207	822.8678095	17933.0188	383.8178184	247.5	15/12/2013	2013-12	Monthly	0	NA	0	>15 years	35.1	1	1	R1_Dec_2013
713	317	109.5323433	246.8143484	247.2687549	107.9940926	36.71453736	200.0064615	94.38014176	24.13458899	215	15/12/2013	2013-12	Monthly	0	NA	0	1-15 years	36.8	1	1	R1_Dec_2013
714	318	67.51050092	237.3543239	127.5253837	76.30017411	29.72129215	72.42573814	37.04641078	24.91312412	139	15/12/2013	2013-12	Monthly	0	NA	0	1-15 years	36	1	1	R1_Dec_2013
715	317	112.8907801	339.8830273	331.0803899	111	21	305.1474504	267.8450224	41	212	24/07/2013	2013-07	Monthly	0	NA	0	1-15 years	36.6	1	1	R1_Jul_2013
716	319	58.13537177	488.347683	81	55	20	60.62532127	65.34773136	24	95	24/07/2013	2013-07	Monthly	0	NA	0	1-15 years	35.2	1	1	R1_Jul_2013
717	318	190.62994	702.0960154	377.1851596	720.1720547	745.0735926	4376.474581	605.8783488	318	223	24/07/2013	2013-07	Monthly	0	NA	0	1-15 years	36.6	1	1	R1_Jul_2013
718	320	989	391.6617719	148.9129231	70.68617599	27.72937626	1157	145	3075.962929	74	15/12/2013	2013-12	Monthly	0	NA	0	1-15 years	35	1	1	R1_Dec_2013
719	321	12	29.88207632	7.085792995	11.57258938	3.20506696	13.81504097	22.58227904	12	10	15/12/2013	2013-12	Monthly	0	NA	0	1-15 years	37	1	1	R1_Dec_2013
720	321	142.3701136	175.5549486	116.7577218	91.76300565	24.13254854	136.9885627	67.60494742	43.32908251	291	24/07/2013	2013-07	Monthly	0	NA	0	1-15 years	36.7	1	1	R1_Jul_2013
721	322	110.862802	362.6501504	272.1493255	936.7678055	23	140.1118536	7122.871204	507	107	24/07/2013	2013-07	Monthly	0	NA	0	1-15 years	36.5	1	1	R1_Jul_2013
722	323	186.3233031	373.3019136	191.1162898	1481.992751	1282.60189	3656.502687	3667.54245	1793.554643	318	23/07/2013	2013-07	Monthly	0	NA	0	>15 years	36.7	1	1	R1_Jul_2013
723	324	47.98053578	9.748736664	12.69706118	96.45767086	11.99763863	123.4965942	41.9184994	20.14135592	200.5	23/06/2013	2013-06	Monthly	0	NA	0	1-15 years	36.6	1	1	NA
724	324	50.23844335	8.349225655	13.47019382	94.20699187	11.99763863	121.0986021	44.62291872	23.59415979	217.5	24/07/2013	2013-07	Monthly	0	NA	0	1-15 years	36.1	1	1	R1_Jul_2013
725	324	52.77858936	15.00895752	12.1650431	93.8854663	11.99763863	128.8920764	49.35565252	25.60829538	228	22/08/2013	2013-08	Monthly	0	NA	0	1-15 years	35.8	1	1	NA
726	324	36.69099795	66.73429215	8.643357623	63.66206276	9.38945632	76.73574784	37.86187043	15.53761742	142	23/09/2013	2013-09	Monthly	1	2	0	1-15 years	36.7	1	1	NA
727	324	151.4758092	9.998680353	10.87074307	99.67292655	13.04091156	108.5091434	50.03175735	22.44322516	231	30/10/2013	2013-10	Monthly	0	NA	0	1-15 years	36.6	1	1	NA
728	324	233.9756715	74.99456283	13.2597276	68.16342074	11.47600217	89.9247045	41.24239457	21.29229054	184	25/11/2013	2013-11	Monthly	0	NA	0	1-15 years	36	1	1	NA
729	324	112.8953783	56.08289047	8.246434724	49.51493771	9.38945632	64.74578724	32.45303179	17.83948667	133	15/12/2013	2013-12	Monthly	0	NA	0	1-15 years	36.4	1	1	R1_Dec_2013
730	324	208.0097345	64.77791225	6.203843926	61.73290935	9.911092783	80.33273602	36.50966077	18.99042129	184	25/11/2013	2013-11	Monthly	0	NA	0	1-15 years	36	1	1	NA
731	325	164.523207	192.0231204	11.37651366	52.71563365	25.19929568	180.9491204	243.3734347	1956.753624	94	15/12/2013	2013-12	Monthly	0	NA	NA	>15 years	35.8	1	1	R1_Dec_2013
732	326	181	768.3409656	81.08539705	185.16143	34.79786985	125.9294119	7256.473382	57	248	15/12/2013	2013-12	Monthly	0	NA	0	>15 years	35	1	1	R1_Dec_2013
733	327	93	277.3409482	9.429978336	101.8387865	10.07306759	148.2460166	127.9662479	91	136	15/12/2013	2013-12	Monthly	0	NA	0	1-15 years	36.6	1	1	R1_Dec_2013
734	325	177.723766	227.8469829	23.11421111	59.91138386	29.81079525	231.2922835	387.6016986	2770.914923	76.5	24/07/2013	2013-07	Monthly	0	NA	0	>15 years	36.5	1	1	R1_Jul_2013
735	327	173.0541299	339.283813	280.6636118	147	24	181.8759638	119.4007931	76	197	24/07/2013	2013-07	Monthly	0	NA	0	1-15 years	36.3	1	1	R1_Jul_2013
736	328	152.7743491	851.6473937	294.6451471	2949.944274	2704.555835	978.0885164	16228.63516	7970.353988	172	24/07/2013	2013-07	Monthly	0	NA	0	>15 years	36.3	1	1	R1_Jul_2013
737	329	346	415.5992053	1223.838191	416.9287908	95.89742623	4066	9212.543819	4084.092807	67.5	15/12/2013	2013-12	Monthly	0	NA	0	>15 years	35.8	1	1	R1_Dec_2013
738	330	62.54717135	862.2672812	217.9526716	144.7972682	24	328.5608583	204.7797046	82.04080846	94	24/06/2013	2013-06	Monthly	0	NA	NA	1-15 years	36.6	1	0	NA
739	330	69.20112574	515.0168474	220.3133098	149.1586317	24	358.8709006	184.4642577	83.78635757	100	23/09/2013	2013-09	Monthly	0	NA	0	1-15 years	36.5	1	0	NA
740	330	8585.030407	4227.721655	377.8299751	368.9713522	426.9027916	18780.71309	13104.60055	19906.74659	202.5	21/10/2013	2013-10	PCD	1	1	1	1-15 years	38.6	1	0	NA
741	330	9642.420707	13754.46391	2304.993911	1447.725587	3462.840782	17957.55258	16272.31333	14086.81742	247	28/10/2013	2013-10	Monthly	0	NA	0	1-15 years	35.5	1	0	NA
742	330	6769.290927	6594.258745	1036.739703	602.8931209	885.8123511	10852.20754	8338.365855	4404.753446	244	25/11/2013	2013-11	Monthly	0	NA	1	1-15 years	35.8	1	0	NA
743	330	3408.981387	3685.563608	1342.798466	529.3539612	477.1000341	5303.044997	4028.760784	2119.096627	183.5	15/12/2013	2013-12	Monthly	0	NA	NA	1-15 years	35.8	1	0	R1_Dec_2013
744	331	146.0431244	782.1173878	237.8249795	292.2883593	1939.51605	278.5605313	9309.163999	3840.13109	104	15/12/2013	2013-12	Monthly	0	NA	0	>15 years	36.3	1	1	R1_Dec_2013
745	332	547.5038598	310.1456321	42.51597343	1081.279388	428.7307668	2550.171143	3765.955082	10698.47327	109	24/07/2013	2013-07	Monthly	0	NA	0	>15 years	36.8	1	1	R1_Jul_2013
746	333	71.68856523	7.401021193	8.548456423	107.0680146	10.43272924	163.0634642	28.39640282	20.71682323	218	23/06/2013	2013-06	Monthly	0	NA	0	1-15 years	35.5	1	1	NA
747	333	84.10705684	7.28771343	8.903083423	160.1197336	13.56254802	240.698459	35.15745111	23.59415979	310	22/08/2013	2013-08	Monthly	0	NA	0	1-15 years	35.5	1	1	NA
748	333	44.59367443	13.2163964	8.202364621	81.02444352	8.867819858	135.4865548	21.63535453	13.81121549	165	23/09/2013	2013-09	Monthly	0	2	0	1-15 years	37.6	1	1	NA
749	333	66.6082732	146.7058286	12.44360669	129.2532789	11.47600217	229.9074945	29.74861248	20.71682323	263	28/10/2013	2013-10	Monthly	0	NA	0	1-15 years	35.8	1	1	NA
750	333	26.5304139	6.823379707	13.78498139	46.94273315	7.824546934	79.13373996	18.93093521	14.3866828	103	22/11/2013	2013-11	Monthly	0	NA	0	1-15 years	36.7	1	1	NA
751	333	67.73722699	10.07986992	13.53018072	144.3649807	14.60582094	221.2147731	24.33977384	17.83948667	237	15/12/2013	2013-12	Monthly	0	NA	0	1-15 years	36.6	1	1	R1_Dec_2013
752	334	28	575.4510321	61	35.93814725	10.45972708	39	19.96215806	28.60263119	64.5	23/06/2013	2013-06	Monthly	0	NA	0	1-15 years	36.1	1	1	NA
753	334	111	646.0022507	440.5801347	195.9484695	21.72404855	491	26.61621075	36.40334878	290	24/07/2013	2013-07	Monthly	0	NA	0	1-15 years	35.5	1	1	R1_Jul_2013
754	334	52	834.4272098	190.3922351	51.34021036	15.68959062	64	27.22112463	36.40334878	118.5	22/08/2013	2013-08	Monthly	1	2	0	1-15 years	37.5	1	1	NA
755	334	42	677.1339445	71	35.93814725	13.67810464	49	19.35724418	26.00239199	81	23/09/2013	2013-09	Monthly	0	NA	0	1-15 years	36	1	1	NA
756	334	62	860.0023105	192.9086435	56.4742314	19.31026538	71	26.91866769	40.30370758	131	22/11/2013	2013-11	Monthly	0	NA	0	1-15 years	36.3	1	1	NA
757	334	54	517.6789424	79	47.91752967	16.09188782	58	22.38181358	39.00358798	91.5	15/12/2013	2013-12	Monthly	0	NA	0	1-15 years	35.8	1	1	R1_Dec_2013
758	335	610.3500389	266.8543762	215.4001278	228.3135979	57.694273	16906.54009	1295.74232	437.1474747	161	15/12/2013	2013-12	Monthly	0	NA	0	1-15 years	35.8	1	1	R1_Dec_2013
759	333	65.5	750.7611539	15.70566208	108.3194366	9.61520088	190.2224872	58.33755418	31	237	15/12/2013	2013-12	Monthly	0	NA	0	1-15 years	36.6	1	1	R1_Dec_2013
760	336	87	444.3619903	33.28683366	657.3113566	8.131432384	852.813106	4069.929545	4091.765027	110	15/12/2013	2013-12	Monthly	0	NA	0	>15 years	35.8	1	1	R1_Dec_2013
761	335	336.6443621	281.0928435	86	109	15	1135.714352	95.19792963	37	95	24/07/2013	2013-07	Monthly	0	NA	0	1-15 years	36.5	1	1	R1_Jul_2013
762	337	248.7653118	537.3651793	286.1355864	134	52	183.8968078	80.67621155	49	165	24/07/2013	2013-07	Monthly	0	NA	0	1-15 years	36.8	1	0	R1_Jul_2013
763	336	118.2987216	360.2538938	258.7642344	1033.299608	508.1524078	1081.151563	3334.230996	4410.873931	135.5	24/07/2013	2013-07	Monthly	0	NA	0	>15 years	35.6	1	1	R1_Jul_2013
764	338	344	525.017485	407.1816527	910.4030621	929.8542397	6351	6115.071446	13604.99535	116	24/06/2013	2013-06	Monthly	0	NA	1	>15 years	36	1	1	NA
765	338	158	1942.684161	641.3728394	393.1206719	1080.568066	375	6717.207978	10675.47318	98	22/08/2013	2013-08	Monthly	0	NA	0	>15 years	35.3	1	1	NA
766	338	411.5	834.4272098	610.5948135	1297.380282	1318.145973	7947.5	8266.994203	16165.90751	209	23/09/2013	2013-09	Monthly	0	NA	0	>15 years	36.2	1	1	NA
767	338	339	662.4853264	485.6360272	1036.022316	1007.59256	6461	6322.829342	13157.45408	153	25/10/2013	2013-10	Monthly	0	NA	0	>15 years	36.1	1	1	NA
768	338	11256.28663	2577.347617	1592.93851	13762.21288	15030.38773	33177.2849	15174.24302	37653.44642	269	25/11/2013	2013-11	Monthly	0	NA	0	>15 years	36.7	1	1	NA
769	338	8759.124926	2289.377095	1628.024863	13237.24622	13714.44186	33895.36329	17262.33372	38023.17914	306	15/12/2013	2013-12	Monthly	0	NA	0	>15 years	36.1	1	1	R1_Dec_2013
770	339	116.431808	515.9053551	72.95455372	33.62576364	39.44237585	4405.271628	585.096408	45.43814613	196	15/12/2013	2013-12	Monthly	0	NA	NA	1-15 years	35.8	1	1	R1_Dec_2013
771	340	67.8341838	303.257547	9.182916559	43.07252994	19.72118793	72.75273914	41.67353333	29.70955709	171	15/12/2013	2013-12	Monthly	0	NA	NA	1-15 years	35.5	1	1	R1_Dec_2013
772	341	241.7978145	589.3948798	352.9851182	201.9019992	602.8823328	5009.632595	11510.1074	548.8672657	365	17/12/2013	2013-12	Monthly	0	NA	0	1-15 years	35.8	1	1	R1_Dec_2013
773	342	464	690.1367657	124.8825825	93.07013173	38.12789236	3341	328	171.2427109	102	15/12/2013	2013-12	Monthly	0	NA	0	1-15 years	36.4	1	1	R1_Dec_2013
774	343	13	32.87028395	7.085792995	11.1096858	3.20506696	18.06582281	22.58227904	11	11	15/12/2013	2013-12	Monthly	0	NA	0	1-15 years	36.3	1	1	R1_Dec_2013
775	344	576.6467354	216.7155779	138.4385813	1250.183521	128.5824743	10040.48298	17315.0322	2554.171184	242	24/07/2013	2013-07	Monthly	0	NA	0	>15 years	36.2	1	1	R1_Jul_2013
776	345	403.5676389	780.7758053	312.2623965	2241.68031	2862.971631	5756.711062	12360.88332	6800.856572	188	24/07/2013	2013-07	Monthly	0	NA	0	>15 years	36	1	1	R1_Jul_2013
777	346	225.7815601	927.2186431	341.3965608	183.5	48	5108.020124	170.2268064	356	431	24/07/2013	2013-07	Monthly	0	NA	0	1-15 years	36.6	1	1	R1_Jul_2013
778	346	369.0920115	519.4366033	458.9796152	198	38	312.5572119	922.9358602	58	431	24/07/2013	2013-07	Monthly	0	NA	0	1-15 years	36.6	1	1	R1_Jul_2013
779	347	112.8907801	638.2688685	263.6322983	126	18	235.7651383	66.15449347	37	179.5	24/07/2013	2013-07	Monthly	0	NA	0	1-15 years	36.5	1	1	R1_Jul_2013
780	343	213.6136916	493.1316148	351.1042201	138.5	42	1251.576077	264.6179739	118	310	24/07/2013	2013-07	Monthly	NA	NA	0	1-15 years	35.4	1	1	R1_Jul_2013
781	340	37.85559092	317.1101338	57	39	13	43.11133957	62.92744501	24	60	24/07/2013	2013-07	Monthly	0	NA	0	1-15 years	36.5	1	1	R1_Jul_2013
782	339	58.13537177	344.0774156	184.4331456	176	26	4005.312892	677.6801771	27	85	24/07/2013	2013-07	Monthly	0	NA	0	1-15 years	36.5	1	1	R1_Jul_2013
783	348	116.9380333	360.8991734	18.87252676	58.50149588	26.29491723	115.6582007	50.84171067	92.62391328	190	15/12/2013	2013-12	Monthly	0	NA	NA	1-15 years	36.6	1	0	R1_Dec_2013
784	349	1208.989073	244.588272	234.2838296	783.436828	2604.08891	7065.409316	1528.756631	154.9284906	163.5	15/12/2013	2013-12	Monthly	0	NA	0	>15 years	36	1	0	R1_Dec_2013
785	350	83.5	453.7802988	9.740539956	564.7428071	1388.599653	1525.499332	3914.740601	311	95.5	15/12/2013	2013-12	Monthly	0	NA	0	>15 years	35	1	0	R1_Dec_2013
786	351	53	4022.246415	9.429978336	94.43232932	9.61520088	111.0516755	77.15612004	30	154.5	15/12/2013	2013-12	Monthly	0	NA	0	1-15 years	36.6	1	0	R1_Dec_2013
787	352	84	279.8525781	62.20280901	123.132351	938.6109474	143.9952347	2193.303851	781	68	15/12/2013	2013-12	Monthly	0	NA	0	>15 years	35.8	1	1	R1_Dec_2013
788	353	77.95868884	143.1656937	14.30538259	154.9325331	66.46770745	247.1727676	408.4006267	420.3028517	152	15/12/2013	2013-12	Monthly	0	NA	NA	>15 years	35.3	1	1	R1_Dec_2013
789	354	72.89643632	292.7902928	22.86835634	1459.385471	356.8052234	1070.30472	14548.4631	931.6480282	122	15/12/2013	2013-12	Monthly	0	NA	NA	>15 years	36	1	1	R1_Dec_2013
790	355	251	544.8759433	484.2940313	302.7724538	98.20820759	262	90	71.50794522	504.5	15/12/2013	2013-12	Monthly	0	NA	0	1-15 years	35.5	1	1	R1_Dec_2013
791	356	70	553.6129398	51.51145021	243.4872805	12.36240113	117.959196	3283.696726	1001	94	15/12/2013	2013-12	Monthly	1	0	0	>15 years	38.2	1	1	R1_Dec_2013
792	357	58.28575122	150.2177417	63.66528393	48.53580464	12.77605511	92.31837924	39.06063629	32.49681188	101	23/07/2013	2013-07	Monthly	0	NA	0	1-15 years	36.8	1	1	R1_Jul_2013
793	356	49.68621415	122.0000444	73.54988072	132.7150908	13.48583595	76.9319827	1392.661917	791.8389829	90	23/07/2013	2013-07	Monthly	0	NA	0	>15 years	36.8	1	1	R1_Jul_2013
794	354	83.1288583	389.1238234	120.0907525	1927.745349	469.3001693	1478.086739	16503.71089	1921.507864	131.5	23/07/2013	2013-07	Monthly	0	NA	0	>15 years	36.3	1	1	R1_Jul_2013
795	358	125.1710395	255.5041103	117.1742733	2000.616653	16.3249593	748.4737414	2531.567287	183.0653736	178	23/07/2013	2013-07	Monthly	0	NA	0	1-15 years	36.3	1	1	R1_Jul_2013
796	355	166.2577166	275.3496749	269.2807032	179.7341516	26.26189105	320.6326505	72.11194392	61.74394258	594	23/07/2013	2013-07	Monthly	0	NA	0	1-15 years	35.8	1	1	R1_Jul_2013
797	359	92.79352303	127	64.5	52	17	81	39	42	58	20/06/2013	2013-06	Monthly	0	NA	1	1-15 years	36.4	1	1	NA
798	359	108.5509137	139	78	59	16	96	50	76	76	18/07/2013	2013-07	Monthly	0	NA	0	1-15 years	36.1	1	1	R1_Jul_2013
799	359	101.547629	162.5	82	67	16	91.5	45	67	80	17/08/2013	2013-08	Monthly	0	NA	0	1-15 years	35.9	1	1	NA
800	359	96.29516541	108	79	48	18	1120.5	90	45	83	17/09/2013	2013-09	Monthly	0	NA	0	1-15 years	36.3	1	1	NA
801	359	112.9279667	126	70	47	15	70	64	48	66	22/10/2013	2013-10	Monthly	0	NA	0	1-15 years	35.9	1	1	NA
802	359	117.3050197	136	72	50	16	77	55	67	69	18/11/2013	2013-11	Monthly	0	NA	0	1-15 years	36	1	1	NA
803	359	89.29188066	119	66	46.5	16	70	52	62	62	11/12/2013	2013-12	Monthly	0	NA	0	1-15 years	36.7	1	1	R1_Dec_2013
804	360	159.3247282	129	79	69	16	1463.5	128	43	76	20/06/2013	2013-06	Monthly	0	NA	0	1-15 years	36.7	1	1	NA
805	360	73.53448995	159	199.9723038	69	17	109	36	29	90	18/07/2013	2013-07	Monthly	1	2	0	1-15 years	36.5	1	1	R1_Jul_2013
806	360	65.6557946	142	85	62	16	91	35	33	89	17/08/2013	2013-08	Monthly	0	NA	0	1-15 years	36.3	1	1	NA
807	360	54.27545687	113	62	48	13	75	26	22	58	17/09/2013	2013-09	Monthly	0	NA	0	1-15 years	36.6	1	1	NA
808	360	54.27545687	140	76.5	64	16	134.5	25	22	91	22/10/2013	2013-10	Monthly	0	NA	0	1-15 years	36.1	1	1	NA
809	360	75.28531114	152	218.9569729	69	16	121	33	30	111.5	18/11/2013	2013-11	Monthly	0	NA	0	1-15 years	36.8	1	1	NA
810	360	73.53448995	128.5	81	60	15	88	27	25	79	11/12/2013	2013-12	Monthly	0	NA	0	1-15 years	36.6	1	1	R1_Dec_2013
811	361	68.28202638	147	82.5	66.5	42	73	192	59	104	20/06/2013	2013-06	Monthly	0	NA	1	>15 years	36.8	1	1	NA
812	361	90.16729125	164	231.6054769	88	43	90.5	187.5	81.5	151	18/07/2013	2013-07	Monthly	0	NA	0	>15 years	36.5	1	1	R1_Jul_2013
813	361	78.78695352	167	206.3020933	76	37	80	186	60	124	18/08/2013	2013-08	Monthly	0	NA	0	>15 years	35.9	1	1	NA
814	361	88.41647006	191	214.2121331	92	46	93	206	68	137	17/09/2013	2013-09	Monthly	0	NA	0	>15 years	36.7	1	1	NA
815	361	55.15086746	109	66	48	26.5	51	120	40	82	22/10/2013	2013-10	Monthly	0	NA	0	>15 years	36	1	1	NA
816	361	77.03613233	163	201.5548967	77	36	75	168	59	124	18/11/2013	2013-11	Monthly	0	NA	0	>15 years	36.9	1	1	NA
817	361	85.79023828	155	214.2121331	80	36	81	167	67	135	11/12/2013	2013-12	Monthly	0	NA	0	>15 years	35.9	1	1	R1_Dec_2013
818	362	31.51478141	165	41	41	11	34	22	19	31	20/06/2013	2013-06	Monthly	1	2	0	1-15 years	36.8	1	1	NA
819	362	122.5574833	2076.353961	208.6753628	76	22	80	41	67	127	18/07/2013	2013-07	Monthly	0	NA	0	1-15 years	35.4	1	1	R1_Jul_2013
820	362	190.8395096	2151.25676	82	56	17	66	45	39	102.5	17/08/2013	2013-08	Monthly	0	NA	0	1-15 years	35.8	1	1	NA
821	362	78.78695352	1011.423884	51	35	12	44	22	20	56	17/09/2013	2013-09	Monthly	0	NA	0	1-15 years	36.3	1	1	NA
822	362	42.89511914	471.4028021	40.5	27	10	29.5	20	18	37	22/10/2013	2013-10	Monthly	0	NA	0	1-15 years	35.2	1	1	NA
823	362	83.16400649	1545.499271	79	55	15	58	33	32	103.5	18/11/2013	2013-11	Monthly	0	NA	0	1-15 years	35.7	1	1	NA
824	362	64.780384	1038.380575	66	43	14	50	31	27	81	11/12/2013	2013-12	Monthly	0	NA	0	1-15 years	36.3	1	1	R1_Dec_2013
825	363	45.52135092	127	49	624.5704973	19	66	1348	18	41	20/06/2013	2013-06	Monthly	0	NA	0	>15 years	34.9	1	1	NA
826	363	108.5509137	445.5663323	231.6054769	908.7307929	31	162	3417.142862	27	109	18/07/2013	2013-07	Monthly	0	NA	0	>15 years	36	1	1	R1_Jul_2013
827	363	108.5509137	410.5846619	206.3020933	820.0889379	41	1066.5	3274.916532	199.5	81	17/08/2013	2013-08	Monthly	0	NA	1	>15 years	36.3	1	1	NA
828	363	66.53120519	372.5273615	73.5	722.4164729	22	104	1534	20	65	17/09/2013	2013-09	Monthly	0	NA	0	>15 years	36.5	1	1	NA
829	363	150.5706223	608.6521372	310.5059755	1394.470303	33	249	4228.167561	26	160	21/10/2013	2013-10	Monthly	0	NA	0	>15 years	36	1	1	NA
830	363	154.9476753	615.463404	334.1217516	1204.222812	32	256.5	3729.492646	31	188	18/11/2013	2013-11	Monthly	0	NA	0	>15 years	35.3	1	1	NA
831	363	235.48545	880.8751648	434.5922717	1943.826167	53	390	5653.757655	38	247	11/12/2013	2013-12	Monthly	0	NA	0	>15 years	35	1	1	R1_Dec_2013
832	364	33.2656026	436.4435888	39	27	10	31	22	16	30	20/06/2013	2013-06	Monthly	1	2	0	1-15 years	36.3	1	1	NA
833	364	158.4493176	712.1918082	68	52	13	47	36	26	72	18/07/2013	2013-07	Monthly	0	NA	0	1-15 years	35.7	1	1	R1_Jul_2013
834	364	110.3017349	819.2054129	78	57	15	60	38.5	31	93	17/08/2013	2013-08	Monthly	0	NA	0	1-15 years	35.9	1	1	NA
835	364	52.52463568	583.6664771	48	36	11	41.5	24.5	20	48	17/09/2013	2013-09	Monthly	0	NA	0	1-15 years	36.1	1	1	NA
836	364	38.51806617	494.9448336	43	28	10.5	33.5	24.5	19	44	21/10/2013	2013-10	Monthly	0	NA	0	1-15 years	37.1	1	1	NA
837	364	118.1804303	179	226.8630434	134.5	20	164	1345	30	110	18/11/2013	2013-11	Monthly	0	NA	0	1-15 years	36.5	1	1	NA
838	364	59.52792044	745.3806699	67	46	13	59	33.5	27	73.5	11/12/2013	2013-12	Monthly	0	NA	0	1-15 years	35.7	1	1	R1_Dec_2013
839	365	100	627.6835304	206.3274852	378.6945738	1421.006401	598	1174.822832	7631.145448	102	20/06/2013	2013-06	Monthly	0	NA	0	>15 years	35.3	1	1	NA
840	365	132.5	850.8693177	284.2558839	533.8371468	1975.528363	767	1853.578588	10051.04822	162	18/07/2013	2013-07	Monthly	0	NA	0	>15 years	36	1	1	R1_Jul_2013
841	365	103	697.2711699	258.2930028	401.235802	1490.12911	639	1224.607622	7950.441046	138	18/08/2013	2013-08	Monthly	0	NA	NA	>15 years	35.8	1	1	NA
842	365	151	1115.287192	319.4095937	649.3817199	2466.977749	910	2006.988415	11882.80774	172	17/09/2013	2013-09	Monthly	0	NA	0	>15 years	36.5	1	1	NA
843	365	19363.07686	179	202.9730921	65.03093312	55.51701297	35116.98614	2894.674483	26460.16166	99	21/10/2013	2013-10	Monthly	0	NA	0	>15 years	35	1	1	NA
844	365	7766.434305	3321.512683	813.2253308	1221.38847	2715.925062	19115.14847	1807.870613	13453.16489	180	18/11/2013	2013-11	Monthly	0	NA	0	>15 years	35.9	1	1	NA
845	365	5271.778413	2720.910575	1000.188147	1448.527286	2826.218087	7685	2510.001373	14928.86124	240	11/12/2013	2013-12	Monthly	0	NA	0	>15 years	36	1	1	R1_Dec_2013
846	365	184	856.349243	313.5524106	440.4638294	1517.804182	1884	1284.145677	8905.000311	185	19/10/2013	2013-10	PCD	1	1	1	>15 years	37.5	1	1	NA
847	366	93.14544641	165.9814589	16.87519179	174.3707543	636.682144	137.1109315	1600.378526	9339.186044	133	12/12/2013	2013-12	Monthly	0	NA	NA	>15 years	36.1	1	1	R1_Dec_2013
848	367	36.95444341	92.66001844	33.88166518	30.8579319	9.495386779	31.71273244	25.00412	20.09764156	63	12/12/2013	2013-12	Monthly	0	NA	NA	1-15 years	36	1	1	R1_Dec_2013
849	368	126.0655272	207.8743336	272.0633651	106.8202438	47.20440518	1440.715068	91.29294086	149.4787447	187	17/12/2013	2013-12	Monthly	0	NA	0	1-15 years	36.5	1	1	R1_Dec_2013
850	369	77.15485819	118.876631	117.5047414	79.82172061	26.22466954	127.0236023	43.22081258	21.02044847	105	11/12/2013	2013-12	Monthly	0	NA	0	1-15 years	36.4	1	0	R1_Dec_2013
851	370	108.5	964.7317558	261.1113549	92	44	102	38	33	198	11/12/2013	2013-12	Monthly	0	NA	0	1-15 years	36.5	1	1	R1_Dec_2013
852	362	42	1583.59986	62.5	39	24	46.5	26	27	81	11/12/2013	2013-12	Monthly	0	NA	0	1-15 years	36.3	1	1	R1_Dec_2013
853	371	122	1503.518068	287.1018802	95	54	127	44	38	225	11/12/2013	2013-12	Monthly	0	NA	0	1-15 years	35.5	1	1	R1_Dec_2013
854	372	52	144.5	182.2304187	2138.088274	64	433.5	6728.504322	290	95	11/12/2013	2013-12	Monthly	0	NA	0	>15 years	35	1	1	R1_Dec_2013
855	373	49	124.5	113.3903203	880.5754686	30.04015762	56	5169.141144	64.92168711	92.5	12/12/2013	2013-12	Monthly	0	NA	0	>15 years	35.7	1	1	R1_Dec_2013
856	374	861	249.5153373	40.15282697	44.43874321	8.241600754	2937.821597	127.9662479	75	61	11/12/2013	2013-12	Monthly	0	NA	0	1-15 years	36.3	1	0	R1_Dec_2013
857	375	79.72551275	320.2204571	128.6391072	133.4767867	48.40239199	118.2126474	88.99508777	35	126	18/07/2013	2013-07	Monthly	0	NA	0	1-15 years	36.5	1	1	R1_Jul_2013
858	372	161.1841888	416.4224054	317.7001231	7046.733893	535.1206259	3676.820963	12415.75611	964.5	284	18/07/2013	2013-07	Monthly	0	NA	0	>15 years	36.4	1	1	R1_Jul_2013
859	376	68.45995117	169.1241159	81.19433819	81.99288326	32.91362656	56.38879156	53.39705266	22	74	18/07/2013	2013-07	Monthly	0	NA	0	1-15 years	36.3	1	1	R1_Jul_2013
860	368	112.6556158	327.4767804	107.1611591	143.0108429	48.40239199	1209.301795	148.3251463	187	121	18/07/2013	2013-07	Monthly	0	NA	0	1-15 years	35.6	1	1	R1_Jul_2013
861	377	79.72551275	444.2784936	102.5183884	127.756353	38.72191359	89.67856007	67.24073298	73	113	18/07/2013	2013-07	Monthly	0	NA	0	1-15 years	35.8	1	1	R1_Jul_2013
862	378	59.06172113	250.4748572	123.5414089	103.8206594	36.96096113	255.1193211	45.7344761	68.12357495	142	18/07/2013	2013-07	Monthly	0	NA	0	1-15 years	36.4	1	1	R1_Jul_2013
863	379	61.42418997	126.270853	102.1182928	1398.8639	147.8438445	2546.379638	1430.712479	73.73375171	118	18/07/2013	2013-07	Monthly	0	NA	0	>15 years	35.3	1	1	R1_Jul_2013
864	371	77.96147189	398.9439389	143.9635095	74.15761385	36.96096113	80.8680112	36.24241502	24.04361469	194	18/07/2013	2013-07	Monthly	0	NA	0	1-15 years	35.5	1	1	R1_Jul_2013
865	380	100.4049259	413.308093	204.8374123	162.087356	42.79690236	247.4176057	39.6940736	25.64652234	223	18/07/2013	2013-07	Monthly	0	NA	0	1-15 years	36.3	1	1	R1_Jul_2013
866	381	98.04245707	261.719087	147.0284842	4607.291421	1723.651442	168.4750233	15089.77412	175.9191141	142	18/07/2013	2013-07	Monthly	0	NA	0	>15 years	36.6	1	1	R1_Jul_2013
867	382	114.579739	230.5493684	111.2971649	153.0825029	68.08598102	2537.715209	1830.577643	57.70467525	111.5	18/07/2013	2013-07	Monthly	0	NA	0	1-15 years	36	1	1	R1_Jul_2013
868	383	308.3021843	268.3648398	103.1379876	68.86064143	35.01564738	78.94258236	32.79075645	29.65379145	120	18/07/2013	2013-07	Monthly	0	NA	0	1-15 years	36.8	1	1	R1_Jul_2013
869	384	193.3780463	228.5230977	81.99073718	93.53810606	38.71196148	1622.012992	563.0094353	788.1770733	313	15/12/2013	2013-12	Monthly	0	NA	NA	1-15 years	36.5	1	1	R1_Dec_2013
870	385	113.3944565	733.5137811	10.54967917	2155.240946	2325.277095	1067.972901	11400.60305	2656.534133	164	15/12/2013	2013-12	Monthly	0	NA	NA	>15 years	36.4	1	1	R1_Dec_2013
871	386	42.52292119	112.1464601	47.08977194	47.572645	10.95621551	56.89637292	896.397702	28.83574659	86	15/12/2013	2013-12	Monthly	0	NA	NA	1-15 years	35	1	1	R1_Dec_2013
872	384	135.6815848	148.8542056	51.19589424	59.91138386	17.74452098	1348.543206	537.834915	146.2356535	163.5	23/07/2013	2013-07	Monthly	0	NA	0	1-15 years	35.7	1	1	R1_Jul_2013
873	387	87.07074338	1686.010666	4.899040836	153.0039123	21.54722384	168.8236639	226.7040213	48.05957764	199	15/12/2013	2013-12	Monthly	0	NA	NA	1-15 years	36.2	1	1	R1_Dec_2013
874	388	73	1894.720698	439.4209779	150	1587.701852	351.5	8905.611177	5124.640667	65	14/12/2013	2013-12	Monthly	0	NA	0	>15 years	36.3	1	1	R1_Dec_2013
875	389	56	288.0153694	15.27094144	72.67586129	38.23187017	125.3980642	60.21941076	30	101	14/12/2013	2013-12	Monthly	0	NA	0	1-15 years	36.6	1	1	R1_Dec_2013
876	388	270.4076655	2728.338615	981.355432	247.8479819	2801.284898	2214.648431	11071.57817	12726.27711	169.5	23/07/2013	2013-07	Monthly	0	NA	0	>15 years	36	1	1	R1_Jul_2013
877	389	211.1664102	433.3289164	251.1651788	160.1159292	1478.734643	486.9050002	71.11038914	63.9103967	385	23/07/2013	2013-07	Monthly	0	NA	0	1-15 years	36.4	1	1	R1_Jul_2013
878	390	72.89643632	212.8740415	135.2817369	1886.844098	3865.894204	501.8073546	6384.565779	386.2242421	192	15/12/2013	2013-12	Monthly	0	NA	NA	>15 years	35.7	1	1	R1_Dec_2013
879	390	60.19675946	224.9603044	158.8998066	2122.655151	4219.672894	604.5364834	6872.801053	579.5264786	147	23/07/2013	2013-07	Monthly	0	NA	0	>15 years	35.7	1	1	R1_Jul_2013
880	391	51.90084431	275.0349171	68	88.97181542	13	67.89449471	43.88136527	36.65653144	84	25/06/2013	2013-06	Monthly	0	NA	1	1-15 years	36.3	1	1	NA
881	391	99.80931598	417.4158257	272.1856985	163.9872676	19	121.2401691	87.76273054	47.12982614	235	23/07/2013	2013-07	Monthly	1	2	0	1-15 years	37.1	1	1	R1_Jul_2013
882	391	218.9150997	916.31869	471.389925	296.5727181	32	270.3655771	102.3898523	78.54971023	507	22/08/2013	2013-08	Monthly	0	NA	0	1-15 years	35.5	1	1	NA
883	391	84.50522086	367.9592325	239.1902658	111.6509056	16	98.20453699	47.13183677	36.65653144	176	23/09/2013	2013-09	Monthly	0	NA	0	1-15 years	36.7	1	1	NA
884	391	99.80931598	605.4922786	256.8730682	136.0745412	19	129.726981	63.38419428	54.1120226	196.5	28/10/2013	2013-10	Monthly	0	NA	0	1-15 years	36.3	1	1	NA
885	391	114.4480157	513.8700245	214.411314	109.9063602	17	109.1161522	56.88325127	47.12982614	129	25/11/2013	2013-11	Monthly	0	NA	0	1-15 years	36.1	1	1	NA
886	391	151.7101603	1021.404462	269.2419126	195.3890849	22	172.1610402	71.51037303	61.09421906	191	14/12/2013	2013-12	Monthly	0	NA	0	1-15 years	35.7	1	1	R1_Dec_2013
887	392	90.93251144	193.4193371	181.1837124	447.0308957	61.1908956	186.0784349	113.7854046	21.02044847	149	14/12/2013	2013-12	Monthly	0	NA	0	1-15 years	36.7	1	1	R1_Dec_2013
888	393	165.3022125	271.2129604	177.7180345	166.0834565	41.5221791	395.0829563	279.4337827	59.57748845	348	23/07/2013	2013-07	Monthly	0	NA	0	1-15 years	36	1	1	R1_Jul_2013
889	394	308.0223683	1013.901412	616.9041789	898.2277226	772.1051315	7847.035164	16396.06957	20521.0113	111	23/07/2013	2013-07	Monthly	0	NA	0	1-15 years	36.4	1	1	R1_Jul_2013
890	395	143.5	409.3568416	100.3786009	126	26.08503338	448.5	467	86	44	24/06/2013	2013-06	Monthly	0	NA	NA	1-15 years	36.6	1	1	NA
891	395	56	189	91.87193984	94	26.08503338	255	204	44	50	23/07/2013	2013-07	Monthly	0	NA	1	1-15 years	36.9	1	1	R1_Jul_2013
892	395	97	380.5470058	88.4692754	96.5	29.34566255	359	252	102.5	50	22/08/2013	2013-08	Monthly	0	NA	0	1-15 years	36.3	1	1	NA
893	395	83	151.5	88.4692754	86	24.45471879	296	181	90	48	23/09/2013	2013-09	Monthly	0	NA	0	1-15 years	36.3	1	1	NA
894	395	57	123	74.85861764	53.5	19.56377503	116	101	34	38	25/10/2013	2013-10	Monthly	0	NA	0	1-15 years	36.2	1	1	NA
895	395	68	174	88.4692754	70.5	22.82440421	174	145.5	39	49	22/11/2013	2013-11	Monthly	0	NA	0	1-15 years	36.8	1	1	NA
896	395	52.5	172	81.66394652	58	21.19408962	121	113	28	47	14/12/2013	2013-12	Monthly	0	NA	0	1-15 years	36	1	1	R1_Dec_2013
897	396	188.7538495	1462.068735	177.6448301	282.8975686	90.91218775	1897.554339	128.3393516	64.61841568	161	14/12/2013	2013-12	Monthly	0	NA	0	1-15 years	35.9	1	1	R1_Dec_2013
898	397	290.7084836	898.2360065	496.6868864	4081.05203	3230.687878	5814.115409	21073.31604	829.139912	474	14/12/2013	2013-12	Monthly	0	NA	0	>15 years	35	1	1	R1_Dec_2013
899	398	198.3982068	659.5430898	256.7135609	279.3533265	73.42907472	240.676299	54.68755878	35.81261592	280	14/12/2013	2013-12	Monthly	0	NA	0	1-15 years	36.6	1	1	R1_Dec_2013
900	399	4393.289832	509.2599517	695.7515079	10153.98218	14876.68159	14291.18329	24119.07583	28866.17425	295	14/12/2013	2013-12	Monthly	0	NA	0	>15 years	36.1	1	1	R1_Dec_2013
901	400	67	149	166.9895256	981.1424197	49.5	164	758.5	3554.209653	116	14/12/2013	2013-12	Monthly	0	NA	0	>15 years	36	1	1	R1_Dec_2013
902	401	82	2038.911002	402.5275615	20485.88082	2137.146894	10895.72706	30862.83994	1049.5	147	23/07/2013	2013-07	Monthly	0	NA	0	>15 years	36	1	1	R1_Jul_2013
903	399	1946.862022	513.2013692	292.5118034	7155.227341	7369.292863	19498.88016	32141.67566	31932.41322	156	23/07/2013	2013-07	Monthly	0	NA	0	>15 years	35.9	1	1	R1_Jul_2013
904	402	137	175.5	175.6498688	71	2252.1179	1200.686783	267	48	111	23/07/2013	2013-07	Monthly	0	NA	0	1-15 years	36.7	1	1	R1_Jul_2013
905	403	71.5	892.9944318	349.2070469	264	24	928.197321	132	318	195	23/07/2013	2013-07	Monthly	0	NA	0	1-15 years	37	1	1	R1_Jul_2013
906	404	192.5	1449.172021	307.5236395	7651.853675	14340.69394	13370.27801	27040.33968	35162.49487	167	23/07/2013	2013-07	Monthly	0	NA	0	>15 years	36	1	1	R1_Jul_2013
907	397	83	862.6931789	279.1653849	4537.433152	3239.511881	11275.09401	27128.14465	1129	172	23/07/2013	2013-07	Monthly	0	NA	0	>15 years	36.5	1	1	R1_Jul_2013
908	396	116	1776.128764	177.3205962	113.5	49	4608.249355	183	57	110.5	23/07/2013	2013-07	Monthly	0	NA	0	1-15 years	35	1	1	R1_Jul_2013
909	405	70.5	382.4660396	265.8165628	152	24	277.303764	42.5	32	116	23/07/2013	2013-07	Monthly	0	NA	0	1-15 years	36.3	1	0	R1_Jul_2013
910	398	63	496.7653699	204.0472678	436.2308516	19	177.1662936	45	31	139	23/07/2013	2013-07	Monthly	0	NA	0	1-15 years	36.3	1	1	R1_Jul_2013
911	400	91	397.274203	347.5401687	3217.353219	365.390789	1263.272702	3458.82026	11761.17139	207	23/07/2013	2013-07	Monthly	1	2	0	>15 years	35.8	1	1	R1_Jul_2013
912	406	49.61007472	342.5490997	10.08390017	47.25120821	14.60828735	67.6227383	51.67518133	29.70955709	134	12/12/2013	2013-12	Monthly	0	NA	NA	1-15 years	36.5	1	1	R1_Dec_2013
913	407	147.4208898	366.0962069	193.5708974	134.9926157	41.95947127	232.3194831	64.39019017	29.58433489	161	12/12/2013	2013-12	Monthly	0	NA	0	1-15 years	36.4	1	1	R1_Dec_2013
914	408	74.39932754	172.1333616	121.0413169	847.0345784	1738.353085	242.9047833	15914.31624	434.4226018	108	15/12/2013	2013-12	Monthly	0	NA	0	>15 years	35.8	1	1	R1_Dec_2013
915	408	74.39932754	168.3293094	117.2871819	855.472012	1772.794154	238.4478148	15623.3305	455.4430503	108	15/12/2013	2013-12	Monthly	0	NA	0	>15 years	35.8	1	1	R1_Dec_2013
916	409	154.3097164	668.5290229	367.1681915	378.3944182	80.42231994	389.4276228	79.38516597	35.03408079	324	15/12/2013	2013-12	Monthly	0	NA	0	1-15 years	36.2	1	1	R1_Dec_2013
917	410	43	169	76	191	31	517.5	715.5	80	77.5	15/12/2013	2013-12	Monthly	0	NA	0	1-15 years	36.3	1	0	R1_Dec_2013
918	411	237.6619288	473.4204537	301.2423529	2927.347313	6151.382164	5151.513919	6609.510394	4200.581865	143.5	23/07/2013	2013-07	Monthly	0	NA	0	>15 years	35.8	1	1	R1_Jul_2013
919	412	98.50461525	158	190.7870251	1819.239577	597.9574049	1450.368592	171.7255538	957.0842114	94	23/07/2013	2013-07	Monthly	0	NA	0	>15 years	36.4	1	1	R1_Jul_2013
920	408	72	509.9143696	219.0768942	2414.599068	4027.438184	600.8248219	28107.80606	2089.870816	116.5	23/07/2013	2013-07	Monthly	0	NA	0	>15 years	35.3	1	1	R1_Jul_2013
921	410	74	733.2021207	380.8705748	1164.727696	362.0116831	4749.789818	3427.863833	345	208	23/07/2013	2013-07	Monthly	0	NA	0	1-15 years	36.2	1	0	R1_Jul_2013
922	407	58	449.086818	182.3325597	86	16	238.7893523	50	31	100	23/07/2013	2013-07	Monthly	0	NA	0	1-15 years	36.3	1	1	R1_Jul_2013
923	406	56.5	800.4258679	170.6374683	86	18	181.0177348	43	32	108	23/07/2013	2013-07	Monthly	0	NA	0	1-15 years	35.9	1	1	R1_Jul_2013
924	413	35.32022149	115.1020437	108.0989715	69.11638267	29.38727857	46.36096542	29.92085424	19.24377864	72.5	25/06/2013	2013-06	Monthly	0	NA	NA	1-15 years	36.5	1	1	NA
925	413	62.42643798	350.7417175	217.7580359	135.0911116	41.14218999	91.94924809	56.38930222	113.629931	170	24/07/2013	2013-07	Monthly	1	0	0	1-15 years	36.3	1	1	R1_Jul_2013
926	413	2469.7229	391.1148203	386.705428	212.0616287	48.97879761	9304.414789	276.1925007	1076.277048	209	21/08/2013	2013-08	Monthly	0	NA	0	1-15 years	36.5	1	1	NA
927	413	474.3587886	336.0544961	303.4389645	136.6619385	33.30558237	6018.425995	103.5721878	248.3363815	129.5	24/09/2013	2013-09	Monthly	0	NA	0	1-15 years	36.7	1	1	NA
928	413	227.1172382	419.9992217	270.637398	157.0826879	39.18303809	4922.761845	107.024594	126.4591168	172	23/10/2013	2013-10	Monthly	0	NA	0	1-15 years	36.3	1	1	NA
929	413	257.5090567	419.0825427	260.8746015	161.7951685	43.1013419	4497.399987	95.51657315	97.13526361	188	21/11/2013	2013-11	Monthly	0	NA	0	1-15 years	35.3	1	1	NA
930	413	114.1746695	311.723417	203.068464	111.5287084	33.30558237	3046.688111	58.69090639	52.23311345	123	14/12/2013	2013-12	Monthly	0	NA	0	1-15 years	36.3	1	1	R1_Dec_2013
931	413	61.60503748	323.2010794	205.2946953	114.6703622	37.22388618	82.677055	46.03208345	53.14948386	148	30/07/2013	2013-07	PCD	1	1	1	1-15 years	39.4	1	1	R1_Jul_2013
932	414	154	554.3061915	383.8785551	141	55	181	50	40	249.5	14/12/2013	2013-12	Monthly	0	NA	0	1-15 years	36.3	1	1	R1_Dec_2013
933	415	45	155	61	43	25	46	29	27.5	69.5	14/12/2013	2013-12	Monthly	0	NA	0	1-15 years	36.1	1	0	R1_Dec_2013
934	416	99.5	418.724205	254.8374799	105	626.0956494	295.5	5950.800716	3094.202863	129	14/12/2013	2013-12	Monthly	0	NA	0	>15 years	36.3	1	1	R1_Dec_2013
935	417	56	186	86.86550625	69.50807306	27.72937626	90.5	28	60.21721703	91	14/12/2013	2013-12	Monthly	0	NA	0	1-15 years	36.3	1	1	R1_Dec_2013
936	413	88	397.8980358	48.41958547	39.80970746	6.868000629	2603.072527	79.03797662	44	123	14/12/2013	2013-12	Monthly	0	NA	0	1-15 years	36.3	1	1	R1_Dec_2013
937	418	158	396.6422467	11.42596241	66.19521124	16.0253348	1997.867463	73.39240687	47	117	14/12/2013	2013-12	Monthly	0	NA	0	1-15 years	36.7	1	1	R1_Dec_2013
938	419	47	455.6639579	8.482175676	65.73230766	174.7065212	87.14102766	80.91983321	29	112	14/12/2013	2013-12	Monthly	0	NA	0	1-15 years	36.1	1	1	R1_Dec_2013
939	416	266.585649	215.8913421	253.6912394	184.2843833	1523.401114	765.349144	6376.215522	4625.732922	206.5	24/07/2013	2013-07	Monthly	1	0	0	>15 years	36	1	1	R1_Jul_2013
940	414	105.105453	165.2805947	158.8998066	119.0643958	35.48904196	283.9038329	198.3078458	118.0717498	256.5	24/07/2013	2013-07	Monthly	0	NA	0	1-15 years	36.6	1	1	R1_Jul_2013
941	420	116.2707435	1426.99184	229.538831	97	23	114.5144957	62.92744501	31	178	24/07/2013	2013-07	Monthly	0	NA	0	1-15 years	36.3	1	1	R1_Jul_2013
942	419	64.89529872	307.1044201	190.5315963	77	782.4163848	105.0838902	58.08687232	29	120	24/07/2013	2013-07	Monthly	0	NA	0	1-15 years	36	1	1	R1_Jul_2013
943	418	348.8122306	540.9502288	369.3015459	151	37	5709.558034	106.4925993	69	252	24/07/2013	2013-07	Monthly	0	NA	0	1-15 years	36.5	1	1	R1_Jul_2013
944	421	283.4861412	349.8881433	323.6151389	117.6458654	44.19006924	1941.938499	68.34459467	42.81671463	503	12/12/2013	2013-12	Monthly	0	NA	NA	1-15 years	35.5	1	1	R1_Dec_2013
945	422	66.82173329	107.2083593	13.51596621	112.6813864	108.4665336	541.9146338	1482.648655	620.4054568	116	12/12/2013	2013-12	Monthly	0	NA	NA	>15 years	36	1	1	R1_Dec_2013
946	423	754.2756258	370.8641024	90.02598192	388.0215923	25.92971005	305.0018679	478.828898	97.42987104	229	12/12/2013	2013-12	Monthly	0	NA	NA	1-15 years	36.6	1	1	R1_Dec_2013
947	424	767.9437076	569.1237811	603.8887279	18918.96684	137.3285842	662.2364716	29502.2643	2182.040826	909	12/12/2013	2013-12	Monthly	0	NA	NA	>15 years	36.4	1	1	R1_Dec_2013
948	425	66.13273559	439.8669967	112.7895133	80.40864502	50.70102779	74.65422239	36.16435338	24.91312412	112.5	12/12/2013	2013-12	Monthly	0	NA	0	1-15 years	35.2	1	1	R1_Dec_2013
949	426	100.5768687	339.3072528	180.0040696	133.8187669	52.44933909	211.7060038	48.51315698	32.6984754	183	12/12/2013	2013-12	Monthly	0	NA	0	1-15 years	36.8	1	1	R1_Dec_2013
950	427	1179.367118	2342.469261	6749.95548	11112.68642	8652.39741	4244.148255	10732.3287	17306.99934	219	12/12/2013	2013-12	Monthly	0	NA	1	>15 years	36.9	1	1	R1_Dec_2013
951	428	241.7978145	201.2022517	326.3975052	97.4294531	55.94596169	2543.814772	58.21578838	97.70615865	268	12/12/2013	2013-12	Monthly	0	NA	0	1-15 years	36	1	1	R1_Dec_2013
952	429	71	819.457875	141.8210758	96.60444053	50.83718981	948.5	924	59.27632301	145	12/12/2013	2013-12	Monthly	0	NA	0	1-15 years	36.3	1	1	R1_Dec_2013
953	429	113.7049901	231.9717391	193.630011	207.2207263	89.43238575	3742.865042	2365.432383	74.74266733	245	24/07/2013	2013-07	Monthly	0	NA	0	1-15 years	36.7	1	1	R1_Jul_2013
954	425	45.86419768	133.2630671	51.95672597	34.12673764	11.35649343	49.63353722	41.06374584	30.33035776	88.5	24/07/2013	2013-07	Monthly	0	NA	0	1-15 years	36.8	1	1	R1_Jul_2013
955	424	612.4781399	391.2066378	546.7064286	20285.22323	67.06673896	666.5784049	24230.56754	2475.543299	825	24/07/2013	2013-07	Monthly	0	NA	0	>15 years	36.5	1	1	R1_Jul_2013
956	421	160.5246919	155.8335545	179.392062	89.48788981	31.94013777	2161.540546	60.0932866	36.82972013	326.5	24/07/2013	2013-07	Monthly	0	NA	0	1-15 years	36	1	1	R1_Jul_2013
957	427	243.6535502	206.8275574	403.3232076	222.2636929	1353.847099	421.8850664	2970.613278	5291.97212	103	24/07/2013	2013-07	Monthly	0	NA	0	>15 years	36	1	1	R1_Jul_2013
958	423	1444.81708	605.4440957	280.6636118	558.6939495	29	269.4458723	977.795684	47	203	24/07/2013	2013-07	Monthly	0	NA	0	1-15 years	36	1	1	R1_Jul_2013
959	426	91.93500652	527.803957	225.2745063	87	36	326.0295055	66.15449347	33	163	24/07/2013	2013-07	Monthly	0	NA	0	1-15 years	36	1	1	R1_Jul_2013
960	430	145.7928726	217.0461923	93.0399619	119.5744861	68.65895055	471.0273495	383.813242	299.2800971	271	12/12/2013	2013-12	Monthly	0	NA	NA	>15 years	36	1	1	R1_Dec_2013
961	431	49.61007472	124.0769346	12.09666153	114.4314974	31.40781781	117.0572918	175.8623107	164.2763745	120	12/12/2013	2013-12	Monthly	0	NA	NA	>15 years	35.2	1	1	R1_Dec_2013
962	432	212.1083807	155.0508509	16.87519179	18.52237348	130.2823879	409.9337032	8901.317884	1038.960688	133	12/12/2013	2013-12	Monthly	0	NA	NA	>15 years	36.2	1	1	R1_Dec_2013
963	433	185.2784423	665.2279183	92.03525519	125.3603483	29.2165747	184.6800301	85.84747867	45.43814613	293	12/12/2013	2013-12	Monthly	0	NA	NA	1-15 years	36.4	1	NA	R1_Dec_2013
964	434	86.05829288	134.7613469	20.87024691	80.35919764	25.19929568	238.7782208	190.031312	120.5858494	148.5	12/12/2013	2013-12	Monthly	0	NA	NA	1-15 years	36.3	1	0	R1_Dec_2013
965	435	447.7737306	656.1737775	1051.081312	1340.064158	754.1657021	1774.987705	2226.031819	5982.487032	546.5	12/12/2013	2013-12	Monthly	0	NA	0	>15 years	35.8	1	1	R1_Dec_2013
966	436	217.6869213	605.0997998	1259.067338	3579.264888	418.653833	7211.375034	4384.1866	1001.196175	311	12/12/2013	2013-12	Monthly	0	NA	0	>15 years	35.2	1	1	R1_Dec_2013
967	437	68	185	159.8170332	115.5	31	91	210	235	109	13/12/2013	2013-12	Monthly	0	NA	0	>15 years	36.7	1	1	R1_Dec_2013
968	438	39.5	99	49	33	18	36.5	21	25	49.5	12/12/2013	2013-12	Monthly	0	NA	0	1-15 years	36.8	1	NA	R1_Dec_2013
969	439	55	379.6934042	95.72868531	1357.588248	216.0580567	160	3654.602457	138.3114204	101.5	12/12/2013	2013-12	Monthly	0	NA	0	>15 years	35.5	1	1	R1_Dec_2013
970	440	45.5	181	99.27401311	241.3207427	35.817111	231	8081.815235	628.5172027	80	12/12/2013	2013-12	Monthly	0	NA	0	>15 years	35.8	1	1	R1_Dec_2013
971	441	34	171	81.21198614	44.76791146	20.7970322	42	25	147.7203605	51	12/12/2013	2013-12	Monthly	0	NA	0	1-15 years	36.6	1	0	R1_Dec_2013
972	442	41	390.8638734	91.1719467	42.4117056	23.10781355	39	26	97.85297767	59	12/12/2013	2013-12	Monthly	0	NA	0	1-15 years	36.8	1	1	R1_Dec_2013
973	443	69	445.1232745	136.5023302	70.68617599	31.19554829	92	32	94.0894016	117	12/12/2013	2013-12	Monthly	0	NA	0	1-15 years	36.3	1	1	R1_Dec_2013
974	444	105	1015.091303	179.0559291	104.2621096	57.76953388	91	46	77.15330931	210	13/12/2013	2013-12	Monthly	1	0	0	>15 years	37.3	1	1	R1_Dec_2013
975	445	43	331.024552	93.47039914	75.39858773	24.26320423	42	27	50.80827686	64	13/12/2013	2013-12	Monthly	0	NA	0	1-15 years	35.6	1	1	R1_Dec_2013
976	446	41	560.8375652	104.1965105	62.43945546	23.10781355	79.5	24	48.92648883	79	13/12/2013	2013-12	Monthly	0	NA	0	1-15 years	36.8	1	1	R1_Dec_2013
977	447	73	373.3103721	120.5467572	162.5782048	35.817111	105	39	69.62615719	118	13/12/2013	2013-12	Monthly	0	NA	0	1-15 years	36.6	1	1	R1_Dec_2013
978	448	45	121	104.1965105	140.1942491	26.57398558	80	96.5	193.8241673	73	13/12/2013	2013-12	Monthly	0	NA	0	1-15 years	36.9	1	0	R1_Dec_2013
979	449	34	107	76.61508126	41.23360266	19.64164152	32	51	41.3993367	49	13/12/2013	2013-12	Monthly	0	NA	0	1-15 years	36	1	0	R1_Dec_2013
980	450	48	281.7363	48.41958547	267.9168208	15.56746809	1397.444529	6042.568666	84	87	13/12/2013	2013-12	Monthly	0	NA	0	>15 years	36.8	1	1	R1_Dec_2013
981	451	93	558.6358949	79.19621125	133.1437148	20.14613518	391.071929	1007.734202	121	208	13/12/2013	2013-12	Monthly	0	NA	0	>15 years	35.5	1	1	R1_Dec_2013
982	440	60.19675946	150.085657	100.1133154	393.12697	84.46391987	394.0902856	7223.601473	546.4880532	128	24/07/2013	2013-07	Monthly	0	NA	0	>15 years	35.8	1	1	R1_Jul_2013
983	442	55.41923886	157.8868267	24.35164979	39.43534127	14.90539762	55.58956169	41.06374584	34.66326601	99	24/07/2013	2013-07	Monthly	0	NA	0	1-15 years	36.6	1	1	R1_Jul_2013
984	451	102.2389407	243.1141024	130.5127433	197.1767064	28.39123357	355.8724619	414.6436775	111.0307739	231	24/07/2013	2013-07	Monthly	0	NA	0	>15 years	36.2	1	1	R1_Jul_2013
985	445	36.3091565	131.2125883	56.34743521	65.97835944	11.00160301	53.6042202	32.04975285	25.99744951	80	24/07/2013	2013-07	Monthly	0	NA	0	1-15 years	35.8	1	1	R1_Jul_2013
986	436	101.2834365	267.0774228	638.5884838	2140.411985	11.87329009	5543.073437	3114.88098	1068.061884	216	24/07/2013	2013-07	Monthly	0	NA	0	>15 years	35.6	1	1	R1_Jul_2013
987	452	63.06327181	154.1911084	29.71537794	40.95208517	11.35649343	66.50893988	42.06530062	36.82972013	112	24/07/2013	2013-07	Monthly	0	NA	0	1-15 years	36.8	1	1	R1_Jul_2013
988	431	64.97428005	138.5953782	44.58197825	106.5470558	46.84553539	207.4681856	372.5783769	331.4674812	148	24/07/2013	2013-07	Monthly	0	NA	0	>15 years	36.5	1	1	R1_Jul_2013
989	432	117.5270066	131.1292994	42.92914271	166.0834565	15.52936943	260.0797351	5859.353391	819.461273	87	24/07/2013	2013-07	Monthly	0	NA	0	>15 years	36.3	1	1	R1_Jul_2013
990	453	117.5270066	121.1701121	100.1133154	830.5245186	13.50920177	137.9812335	985.5299002	556.7787103	102	24/07/2013	2013-07	Monthly	0	NA	0	>15 years	36.3	1	1	R1_Jul_2013
991	446	94.6389773	980.7310824	295.8605552	200	53.5	322.6614321	64.54096924	40	180	24/07/2013	2013-07	Monthly	0	NA	0	1-15 years	35.5	1	1	R1_Jul_2013
992	454	64.79683228	207.6597878	10.26923939	1032.58347	684.9927485	5672.381834	795.131016	113.5953653	162	12/12/2013	2013-12	Monthly	0	NA	NA	>15 years	36.2	1	1	R1_Dec_2013
993	455	71	471.907895	179.5409129	60	40	70	38	26	120.5	14/12/2013	2013-12	Monthly	0	NA	0	1-15 years	36.4	1	1	R1_Dec_2013
994	456	149	476.3390433	303.2329721	98	64	135	44	150	251.5	14/12/2013	2013-12	Monthly	0	NA	0	1-15 years	36.2	1	1	R1_Dec_2013
995	455	50.64171827	136.9545024	34.2558544	53.08603633	36.1988228	67.50161063	53.58318055	30.33035776	127	18/07/2013	2013-07	Monthly	0	NA	0	1-15 years	36.4	1	1	R1_Jul_2013
996	454	39	167	86	1561.631561	760.472045	9414.84793	530	73	95	18/07/2013	2013-07	Monthly	0	NA	0	>15 years	36.4	1	1	R1_Jul_2013
997	457	63.78588875	7.837282049	14.38835631	118.9644607	14.08418448	242.1972041	58.82112013	24.74509441	182	25/06/2013	2013-06	Monthly	0	NA	0	1-15 years	36.4	1	1	NA
998	457	85.23601062	6.786069159	14.81158237	109.2876398	21.90873141	416.6511308	91.27415192	36.82990796	331	24/07/2013	2013-07	Monthly	0	NA	1	1-15 years	36.6	1	1	R1_Jul_2013
999	457	54.75425848	8.985779871	13.29321778	107.3895402	14.08418448	251.7891726	55.44059598	27.04696366	232	20/08/2013	2013-08	Monthly	0	NA	0	1-15 years	36.6	1	1	NA
1000	457	57.29440449	10.73018345	17.92640936	102.2451311	13.56254802	248.1921844	46.98928562	20.71682323	187.5	24/09/2013	2013-09	Monthly	0	NA	0	1-15 years	36.3	1	1	NA
1001	457	58.14111983	10.37698504	8.800740731	108.6756425	14.08418448	281.1645761	58.48306771	25.32056172	212	25/10/2013	2013-10	Monthly	0	NA	0	1-15 years	36.7	1	1	NA
1002	457	75.63990347	4.483554466	10.26313132	144.3649807	17.73563972	347.7088574	70.99100705	38.5563099	265	21/11/2013	2013-11	Monthly	0	NA	0	1-15 years	36.2	1	1	NA
1003	457	76.76885725	10.93168186	13.14863534	148.5448131	17.73563972	349.2076025	69.30074498	36.82990796	285	15/12/2013	2013-12	Monthly	0	NA	0	1-15 years	36.1	1	1	R1_Dec_2013
1004	458	146.2990979	255.1490636	117.1673191	2695.993472	3575.21131	6241.811927	19915.23495	3183.156173	243	15/12/2013	2013-12	Monthly	0	NA	NA	>15 years	36	1	1	R1_Dec_2013
1005	459	63.78438178	516.9584218	13.61680698	45.00115068	13.87787298	97.93637961	41.67353333	55.92387217	169	15/12/2013	2013-12	Monthly	0	NA	NA	1-15 years	36.5	1	1	R1_Dec_2013
1006	460	88	662.9985593	365.3594487	1035.086065	44.48254108	469	825	69.62615719	181	15/12/2013	2013-12	Monthly	0	NA	0	1-15 years	36.4	1	1	R1_Dec_2013
1007	461	87	363.3637186	162.4166175	100.9129794	18.31466834	1128.582578	2361.730016	32	244	15/12/2013	2013-12	Monthly	0	NA	0	1-15 years	34.8	1	0	R1_Dec_2013
1008	460	118.4825107	315.9534189	265.9082323	1371.341877	71.68786477	1564.449093	2542.642216	196.6057119	160	24/07/2013	2013-07	Monthly	0	NA	0	1-15 years	36.5	1	1	R1_Jul_2013
1009	462	52.55272651	103.7415344	61.95258123	61.42812775	16.67984972	214.4168808	388.1024759	36.82972013	132	24/07/2013	2013-07	Monthly	0	NA	0	>15 years	36	1	1	R1_Jul_2013
1010	459	40.13117297	294.8082358	26.41433302	37.16022543	11.35649343	65.51626914	39.06063629	31.95519835	117	24/07/2013	2013-07	Monthly	0	NA	0	1-15 years	36.3	1	1	R1_Jul_2013
1011	458	100.3279324	173.4995861	100.1133154	2119.522241	2555.652304	6090.035017	16414.57792	3004.441227	144	24/07/2013	2013-07	Monthly	0	NA	0	>15 years	35.8	1	1	R1_Jul_2013
1012	463	10096.9362	5557.114012	1396.149447	6539.839411	19825.8513	7887.5	13947.19771	36991.26953	151	13/12/2013	2013-12	Monthly	0	NA	0	>15 years	35.3	1	1	R1_Dec_2013
1013	464	32	137	75.08277963	38.8773968	35.817111	39	22	39.51754867	45	12/12/2013	2013-12	Monthly	0	NA	0	1-15 years	35.8	1	1	R1_Dec_2013
1014	465	95	680.5585032	143.5940172	115.4540875	36.97250168	132	28	52.6900649	138	12/12/2013	2013-12	Monthly	0	NA	0	1-15 years	35.7	1	1	R1_Dec_2013
1015	466	43	163	94.23654995	62.43945546	21.95242287	94	22	43.28112474	63	12/12/2013	2013-12	Monthly	0	NA	0	1-15 years	36.5	1	1	R1_Dec_2013
1016	467	92	343.790729	254.1343792	72	37	184.869176	55	34	145	24/07/2013	2013-07	Monthly	0	NA	0	1-15 years	37	1	1	R1_Jul_2013
1017	466	54	361.8957851	187.3441948	97	35	456.3957782	29	28	107	24/07/2013	2013-07	Monthly	0	NA	0	1-15 years	36.3	1	1	R1_Jul_2013
1018	464	45	180.5	65.5	61	88	107.8403526	29	31	84	24/07/2013	2013-07	Monthly	0	NA	0	1-15 years	36.4	1	1	R1_Jul_2013
1019	463	977	940.4764402	900.596677	6178.804708	8716.742585	12360.23756	11272.05116	29602.29511	140	24/07/2013	2013-07	Monthly	0	NA	0	>15 years	36.3	1	1	R1_Jul_2013
1020	468	501.5065783	684.2582776	399.6790199	170.2080807	66.43582951	588.8769632	200.2270297	73.96083722	416.5	13/12/2013	2013-12	Monthly	0	NA	0	1-15 years	36.8	1	1	R1_Dec_2013
1021	469	59	177	91.93809751	107.7964184	177.9301643	435	696	1980.273498	49	12/12/2013	2013-12	Monthly	0	NA	0	>15 years	36.1	1	1	R1_Dec_2013
1022	468	150.9696507	446.6944003	174.3706201	89.48788981	24.84232937	507.2547504	205.3187292	82.32525677	327	27/07/2013	2013-07	Monthly	0	NA	0	1-15 years	36.4	1	1	R1_Jul_2013
1023	469	137	623.2579761	214.9022971	270	1139.867098	3922.692828	2860.319727	8782.4656	100	24/07/2013	2013-07	Monthly	0	NA	0	>15 years	36.3	1	1	R1_Jul_2013
1024	470	872.7323348	205.5743741	2232.558861	4823.999074	1307.96616	12304.28605	1481.910845	2526.676144	158	12/12/2013	2013-12	Monthly	0	NA	NA	>15 years	36.4	1	1	R1_Dec_2013
1025	471	1910.999235	334.1632193	949.0695009	74.8947722	72.31102239	7778.946723	1423.567899	19094.66226	122.5	12/12/2013	2013-12	Monthly	0	NA	NA	1-15 years	36.6	1	1	R1_Dec_2013
1026	472	8506.453908	10070.29709	643.878009	10264.78687	477.7012277	23640.68264	2786.474667	3271.918262	658	12/12/2013	2013-12	Monthly	0	NA	NA	1-15 years	35.8	1	1	R1_Dec_2013
1027	473	133.6432365	157.3926594	124.5780251	61.04013929	80.42231994	181.6214664	51.15932918	257.6951276	120	12/12/2013	2013-12	Monthly	0	NA	0	1-15 years	35.5	1	1	R1_Dec_2013
1028	474	242.4866972	435.3929543	314.5831437	1068.434326	1162.798557	369.3712645	17752.9218	102.3773694	305	12/12/2013	2013-12	Monthly	0	NA	0	>15 years	36.3	1	1	R1_Dec_2013
1029	473	263.2413846	221.6618955	66.092868	73.56207891	61.04115218	464.5699084	97.15081333	1567.951859	143	18/07/2013	2013-07	Monthly	0	NA	0	1-15 years	36.3	1	1	R1_Jul_2013
1030	471	556	136	240.7810759	67.5	23	152.1319261	57	29	62	18/07/2013	2013-07	Monthly	0	NA	0	1-15 years	36.5	1	1	R1_Jul_2013
1031	475	308.0251874	232.9283961	188.8166807	119.3828428	38.20346214	1404.737252	359.6256519	26.57474193	98	20/06/2013	2013-06	Monthly	0	NA	0	1-15 years	36.4	1	1	NA
1032	475	227.5279384	165.5017551	129.1182159	87.96630522	35.26473428	1022.259288	262.3828756	26.57474193	88	18/07/2013	2013-07	Monthly	0	NA	0	1-15 years	36.3	1	1	R1_Jul_2013
1033	475	279.6868702	209.771772	185.2528021	105.2454009	41.14218999	1108.027074	287.7005215	29.32385316	108	18/08/2013	2013-08	Monthly	0	NA	0	1-15 years	36.3	1	1	NA
1034	475	213.5641299	209.771772	184.3617813	103.674574	35.26473428	1121.16268	279.6449069	24.74200111	100	18/09/2013	2013-09	Monthly	0	NA	0	1-15 years	36.3	1	1	NA
1035	475	12950.14933	632.5792139	1805.879419	326.7319908	191.9968866	26455.34665	17354.45687	1127.593791	165.5	22/10/2013	2013-10	Monthly	0	NA	0	1-15 years	36.3	1	1	NA
1036	475	4504.024512	427.7901773	840.150786	211.2762152	88.1618357	23496.49447	8561.253714	273.994753	170.5	18/11/2013	2013-11	Monthly	0	NA	0	1-15 years	35.8	1	1	NA
1037	475	1120.747608	352.5774193	451.7101131	152.3702073	78.36607618	16032.9243	3119.731307	94.38615237	143	12/12/2013	2013-12	Monthly	0	NA	NA	1-15 years	35.8	1	1	R1_Dec_2013
1038	475	2350.615421	209.771772	183.9162635	98.96209337	41.14218999	21353.48731	2524.650715	123.7100055	103	26/09/2013	2013-09	PCD	1	1	0	1-15 years	36.2	1	1	NA
1039	476	23.82061449	146.4315941	87.079727	135.0911116	41.14218999	52.92876886	84.00855229	17.41103782	53	20/06/2013	2013-06	Monthly	0	NA	0	1-15 years	36.3	1	1	NA
1040	476	41.89142549	243.825631	187.0347832	216.7741093	58.77455713	100.8350998	118.5326149	23.8256307	103	18/07/2013	2013-07	Monthly	0	NA	0	1-15 years	36	1	1	R1_Jul_2013
1041	476	87.88985348	394.7836593	302.5526589	389.565066	111.6716586	352.3433372	111.0524013	69.64415127	241.5	18/08/2013	2013-08	Monthly	0	NA	0	1-15 years	37	1	1	NA
1042	476	92.81825648	584.1829708	130.6195905	1963.61817	50.93794951	256.5306753	2309.904791	43.98577975	74.5	24/10/2013	2013-10	Monthly	0	NA	0	1-15 years	36.6	1	1	NA
1043	476	65.71203998	445.1996998	194.1618397	1804.410808	52.89710142	151.4458204	1578.900462	34.82207563	112	21/11/2013	2013-11	Monthly	0	NA	0	1-15 years	36.3	1	1	NA
1044	476	88.71125398	447.9478334	225.3217968	2237.322714	76.40692427	200.8975168	1688.22666	34.82207563	143	17/12/2013	2013-12	Monthly	0	NA	0	1-15 years	36.4	1	1	R1_Dec_2013
1045	476	911.1140951	844.0914502	124.6140921	119.3828428	121.4674181	750.2749571	927.5464814	378.4609799	107	16/08/2013	2013-08	PCD	1	1	1	1-15 years	36.7	1	1	NA
1046	477	116.4296091	133	64	34	13	41	22	21	58.5	20/06/2013	2013-06	Monthly	0	NA	0	>15 years	36.4	1	1	NA
1047	477	649.5546612	412.1062283	220.5383872	60.5	17	76	36	35	110	18/07/2013	2013-07	Monthly	0	NA	1	>15 years	36.3	1	1	R1_Jul_2013
1048	477	322.1510988	155	215.7938455	58	16	57	33	31	109	18/08/2013	2013-08	Monthly	0	NA	0	>15 years	37.3	1	1	NA
1049	477	136.5640528	115	62	34.5	16	38	27	21	54	18/09/2013	2013-09	Monthly	0	NA	0	>15 years	37	1	1	NA
1050	477	215.3510063	168	83	51	14	66	30.5	27	86	18/11/2013	2013-11	Monthly	0	NA	0	>15 years	36	1	1	NA
1051	477	280.1313903	440.2449832	202.3461568	60	16	90	33	31	98.5	13/12/2013	2013-12	Monthly	0	NA	0	>15 years	35.3	1	1	R1_Dec_2013
1052	478	47.27217211	1166.917748	57	130	15	69	120	23	51	20/06/2013	2013-06	Monthly	0	NA	NA	1-15 years	36.3	1	1	NA
1053	478	183.8362249	149	226.8630434	68	20	1331.5	478	120	134	18/07/2013	2013-07	Monthly	0	NA	0	1-15 years	36.4	1	1	R1_Jul_2013
1054	478	2833.624907	8589.092655	274.2453663	718.3766816	59	26699.95558	6208.545535	3237.207134	117	18/08/2013	2013-08	Monthly	0	NA	0	1-15 years	36.6	1	1	NA
1055	478	187.3378673	5912.302066	71	964.2595697	17	8772.5	3669.492272	166	53	18/09/2013	2013-09	Monthly	0	NA	0	1-15 years	36.7	1	1	NA
1056	478	80.53777471	4622.917968	196.8068289	1072.737475	19	3315	1412	73	81	22/10/2013	2013-10	Monthly	0	NA	0	1-15 years	36	1	1	NA
1057	478	66.53120519	3701.841698	203.1373927	921.6121095	19	1229	937	42	85.5	18/11/2013	2013-11	Monthly	0	NA	0	1-15 years	36.2	1	1	NA
1058	478	45.52135092	855.3161114	60	65	14	60.5	101	25	57	13/08/2013	2013-08	PCD	1	1	1	1-15 years	39.1	1	1	NA
1059	479	147.0689799	471.4028021	260.0406181	141	39	355	973	129	130	20/06/2013	2013-06	Monthly	0	NA	0	1-15 years	36.8	1	1	NA
1060	479	178.5837613	551.8418302	313.6562536	153.5	36	392.5	973	127	180	18/07/2013	2013-07	Monthly	0	NA	1	1-15 years	36.9	1	1	R1_Jul_2013
1061	479	171.5804766	550.3256885	320.7426935	145	39	361	979	131	200	18/08/2013	2013-08	Monthly	0	NA	0	1-15 years	35.8	1	1	NA
1062	479	192.5903308	740.8565043	378.1325892	190	39	413.5	803	109.5	233	22/10/2013	2013-10	Monthly	0	NA	0	1-15 years	36.1	1	1	NA
1063	479	169.8296554	595.7828897	321.5299308	145	33	333	760	106.5	180	18/11/2013	2013-11	Monthly	0	NA	0	1-15 years	36.2	1	1	NA
1064	479	148.8198011	500.2588061	274.2453663	119	31	270	703.5	95	163	12/12/2013	2013-12	Monthly	0	NA	0	1-15 years	35.2	1	1	R1_Dec_2013
1065	480	32	76	71.45595321	37	48.90943759	230.5	354.5	146	42	18/07/2013	2013-07	Monthly	1	2	0	>15 years	39.1	1	1	R1_Jul_2013
1066	480	35	96	85.06661096	42	52.17006676	267	430	163	54	18/08/2013	2013-08	Monthly	0	NA	0	>15 years	36	1	1	NA
1067	480	27	69	66.35195655	33	44.01849383	305	303	141	33	18/09/2013	2013-09	Monthly	0	NA	0	>15 years	36.3	1	1	NA
1068	480	50	118	102.0799332	85.5	83.1460439	456.5	609	317	68	21/10/2013	2013-10	Monthly	0	NA	0	>15 years	36.5	1	1	NA
1069	480	30	72	71.45595321	36	42.38817924	198	300	124	41	18/11/2013	2013-11	Monthly	0	NA	0	>15 years	36.5	1	1	NA
1070	480	44	107	88.4692754	52	71.73384179	389	502	275	51	12/12/2013	2013-12	Monthly	0	NA	NA	>15 years	36.1	1	1	R1_Dec_2013
1071	481	60	1245.031499	125.0479181	37	22.82440421	55	25	39	90	18/07/2013	2013-07	Monthly	1	2	0	1-15 years	36.4	1	0	R1_Jul_2013
1072	481	34	1017.530237	108.885262	31	21.19408962	46	25	27	77	18/08/2013	2013-08	Monthly	0	NA	0	1-15 years	36.7	1	0	NA
1073	481	28	585.270209	90.17060762	26	17.93346045	39.5	20	20	59	18/09/2013	2013-09	Monthly	0	NA	0	1-15 years	36.3	1	0	NA
1074	481	47	2141.305449	131.0025809	63	107.6007627	61.5	30	26	103.5	21/10/2013	2013-10	Monthly	0	NA	0	1-15 years	36.5	1	0	NA
1075	481	44	1887.037418	107.1839298	36	26.08503338	50	25	23	85	18/11/2013	2013-11	Monthly	0	NA	0	1-15 years	36.9	1	0	NA
1076	481	30.5	1043.801415	91.87193984	29	22.00924691	40	23	22	56	12/12/2013	2013-12	Monthly	0	NA	NA	1-15 years	36.9	1	0	R1_Dec_2013
1077	482	192.9646776	526.4830417	323.9132323	267.787719	19	765.0254672	835.3711759	218.1936395	159	20/06/2013	2013-06	Monthly	0	NA	0	1-15 years	36.3	1	1	NA
1078	482	122.4327609	336.8817147	248.622925	153.5199952	14	430.4026004	412.8098807	137.8983802	116	18/07/2013	2013-07	Monthly	0	NA	0	1-15 years	35.4	1	1	R1_Jul_2013
1079	482	213.5919362	656.9392593	536.7040109	450.6631253	31	800.1851162	355.9266294	192.0104028	420	18/08/2013	2013-08	Monthly	0	NA	1	1-15 years	36.6	1	1	NA
1080	482	127.7559245	362.2054114	232.1131608	165.731813	14	451.61963	516.8249687	138.7711547	96	18/09/2013	2013-09	Monthly	0	NA	0	1-15 years	36.3	1	1	NA
1081	482	223.5728678	595.7696396	322.7395041	286.1054457	18	740.1712325	832.1207043	223.4302869	156	24/10/2013	2013-10	Monthly	0	NA	0	1-15 years	37.1	1	1	NA
1082	482	446.4803401	820.1243123	489.4838812	446.6036225	30	960.2221394	923.9465243	569.0490119	291	18/11/2013	2013-11	Monthly	0	NA	0	1-15 years	36.3	1	1	NA
1083	482	356.6519558	812.1474931	418.7958196	402.9899875	28	910.5136701	1004.395694	441.6239264	240.5	13/12/2013	2013-12	Monthly	0	NA	0	1-15 years	36.3	1	1	R1_Dec_2013
1084	483	54.67232724	171.1879132	19.37192053	2211.225353	29.94698907	235.0473111	22349.8057	65.53578769	160	12/12/2013	2013-12	Monthly	0	NA	NA	>15 years	35.6	1	1	R1_Dec_2013
1085	484	80.99604035	139.9625548	116.1614478	1655.418143	83.26723791	263.4954975	3249.259263	51.55481965	148	12/12/2013	2013-12	Monthly	0	NA	NA	1-15 years	35.7	1	0	R1_Dec_2013
1086	485	154.3987019	302.7340629	434.1023543	32.46385841	98.60593963	2970.736848	454.6582487	312.8241599	184	12/12/2013	2013-12	Monthly	0	NA	NA	1-15 years	36	1	1	R1_Dec_2013
1087	486	68.8466343	1046.651888	12.21537914	44.3582771	246.3208068	76.48364884	61.67682933	34.9524201	144.5	12/12/2013	2013-12	Monthly	0	NA	NA	1-15 years	36.6	1	1	R1_Dec_2013
1088	487	1003.702039	1022.577257	332.3052286	276.1171654	94.40881036	726.4858656	449.8492738	45.15503746	168.5	17/12/2013	2013-12	Monthly	0	NA	1	1-15 years	35.7	1	1	R1_Dec_2013
1089	488	78	1734.846414	166.9895256	72	33	894.5	210.5	31	109	12/12/2013	2013-12	Monthly	0	NA	0	1-15 years	36.6	1	1	R1_Dec_2013
1090	489	66	176	560.6416593	315.1425346	38.12789236	168.5	8583.978164	69.62615719	112	13/12/2013	2013-12	Monthly	0	NA	0	1-15 years	37.1	1	0	R1_Dec_2013
1091	487	274.7063863	929.4869464	95.55494709	209.7492363	38.72191359	103.9456037	77.12907607	42	105	18/07/2013	2013-07	Monthly	0	NA	0	1-15 years	35.9	1	1	R1_Jul_2013
1092	483	61.15226357	117.850383	60.73814444	47.39824672	19.16408266	248.6640215	58.09017704	37.9129472	81	18/07/2013	2013-07	Monthly	0	NA	0	>15 years	36	1	1	R1_Jul_2013
1093	490	74.52932123	246.4171078	140.9424084	727.9272734	77.36611148	209.4535271	20228.90608	763.6750792	184	18/07/2013	2013-07	Monthly	0	NA	0	>15 years	36.3	1	1	R1_Jul_2013
1094	488	370.7355979	836.9805519	97.61955077	99.34672513	22.00320602	2463.312452	311.4835355	49.82844489	190	18/07/2013	2013-07	Monthly	0	NA	0	1-15 years	35.9	1	1	R1_Jul_2013
1095	489	91.2506433	141.0884867	221.3140056	189.5929869	17.74452098	559.8662999	6879.739345	54.16135314	152	18/07/2013	2013-07	Monthly	0	NA	0	1-15 years	36	1	0	R1_Jul_2013
1096	491	323.7748513	710.1099965	1758.509594	472.9364384	345.2914823	1478.042179	9166.38893	1105.633942	408.5	14/12/2013	2013-12	Monthly	0	NA	0	>15 years	36.9	1	NA	R1_Dec_2013
1097	492	119.3212372	147.0057806	89.29919783	1818.441297	47.41570623	469.4890469	17071.65236	391.1916505	72	17/12/2013	2013-12	Monthly	0	NA	0	>15 years	36.3	1	1	R1_Dec_2013
1098	492	358.7648074	254.9413318	204.1761053	3055.242328	116.1657408	915.1289426	19088.26718	450	124	26/07/2013	2013-07	Monthly	0	NA	0	>15 years	35.2	1	1	R1_Jul_2013
1099	493	138.3346453	228.2950071	113.4057487	2441.300281	31.37664453	2909.245192	4486.99399	61	96	26/07/2013	2013-07	Monthly	0	NA	0	1-15 years	36.3	1	1	R1_Jul_2013
1100	494	1103.220078	487.1516432	369.3015459	200	39	417.6411021	77.44916309	43	279	26/07/2013	2013-07	Monthly	0	NA	0	1-15 years	36.3	1	1	R1_Jul_2013
1101	495	32.45742126	9.588421986	162.9321037	328.2824595	43.81746283	457.4169969	3650.139274	762.4941883	80	17/06/2013	2013-06	Monthly	0	NA	0	>15 years	35.2	1	1	NA
1102	495	63.78588875	13.16935064	350.4624151	492.8862076	70.4209224	733.1860907	5448.404187	410.9474706	169	26/07/2013	2013-07	Monthly	0	NA	1	>15 years	35.5	1	1	R1_Jul_2013
1103	495	49.67396646	9.467141563	183.5201249	342.8816621	47.46891806	512.5708156	3903.903571	748.1075055	139	24/08/2013	2013-08	Monthly	0	NA	0	>15 years	37	1	1	NA
1104	495	32.17518282	12.84018599	57.42174226	215.0135127	27.12509604	340.514881	2662.632726	481.6661401	87	26/09/2013	2013-09	Monthly	0	NA	0	>15 years	36.2	1	1	NA
1105	495	178.3746977	8.803056238	303.8249908	408.5441891	56.33673792	629.7726805	4943.762736	287.5306657	197	29/10/2013	2013-10	Monthly	0	NA	0	>15 years	35.8	1	1	NA
1106	495	127.5717775	12.86495113	371.6525721	520.311302	73.02910471	772.4532116	5382.301878	390.5178372	216.5	27/11/2013	2013-11	Monthly	0	NA	0	>15 years	36.3	1	1	NA
1107	495	83.54257995	8.692144428	175.5333822	325.0934744	45.12155398	511.9713176	3753.931994	707.2493263	167	16/12/2013	2013-12	Monthly	0	NA	0	>15 years	36.4	1	1	R1_Dec_2013
1108	496	45	1155.084189	15.17303813	222.193716	12.82026784	149.308712	380.1350304	693	87	16/12/2013	2013-12	Monthly	0	NA	0	>15 years	35.5	1	1	R1_Dec_2013
1109	496	90.58302113	1905.971933	261.1983729	819.7457961	39	400.1271204	646.2164545	2973.380356	136	26/07/2013	2013-07	Monthly	0	NA	0	>15 years	36.2	1	1	R1_Jul_2013
1110	497	55	3497.993699	893.5543012	364.2694549	308.2172047	657.5	1062.833688	11842.18837	86	27/06/2013	2013-06	Monthly	1	0	0	>15 years	35.8	1	1	NA
1111	497	101.5	3946.06426	1247.318172	504.5107501	357.3751859	933	768.3221889	13135.72453	182.5	24/08/2013	2013-08	Monthly	0	NA	0	>15 years	36.3	1	1	NA
1112	497	1007.5	4556.464628	2114.293898	903.1747565	1857.040891	18569.05832	3029.931864	35677.94056	317	30/10/2013	2013-10	Monthly	0	NA	0	>15 years	35.3	1	1	NA
1113	497	190	2898.857955	1325.327776	363.3679163	500.5822492	2805	921.694451	23602.17951	165.5	27/11/2013	2013-11	Monthly	0	NA	0	>15 years	35.5	1	1	NA
1114	497	91	2041.647897	965.4945238	207.4450796	291.8884818	1176	940.6410844	14828.75378	113	17/12/2013	2013-12	Monthly	0	NA	0	>15 years	36.3	1	1	R1_Dec_2013
1115	497	78.5	2235.593421	643.8675623	234.4788549	228.5727764	1153	789.1101573	26093.15736	128	19/10/2013	2013-10	PCD	1	1	1	>15 years	38	1	1	NA
1116	498	57.77659907	159.6969271	86.98878466	4618.904637	142.2471187	10953.95204	15859.72722	720.3987085	75.5	17/12/2013	2013-12	Monthly	0	NA	0	>15 years	37.02	1	1	R1_Dec_2013
1117	499	375.5478939	573.2123681	91.6097341	66.2332001	27.09468927	106.9721879	52.65579324	41.32306167	133	17/12/2013	2013-12	Monthly	0	NA	0	1-15 years	37	1	1	R1_Dec_2013
1118	500	9119.248542	5570.130987	1042.357813	4755.53665	9107.82361	26799.27025	18797.70042	7082.957971	247.5	17/12/2013	2013-12	Monthly	0	NA	0	>15 years	36.4	1	1	R1_Dec_2013
1119	501	114.5	482.2212426	215.6657691	137	37	451.651692	53	32	122	17/12/2013	2013-12	Monthly	0	NA	0	>15 years	36.3	1	1	R1_Dec_2013
1120	502	39	378.4342234	58	67	19	106.5897993	239	23	56	17/12/2013	2013-12	Monthly	0	NA	0	1-15 years	35.9	1	1	R1_Dec_2013
1121	501	85.66917122	335.8427163	149.3436871	219.9257951	23.84624984	448.0138037	96.9583675	37	142	27/07/2013	2013-07	Monthly	0	NA	0	>15 years	36.6	1	1	R1_Jul_2013
1122	502	106.7353609	417.1709134	109.940922	149.1234736	31.37664453	116.6258156	629.4598779	34	93.5	27/07/2013	2013-07	Monthly	0	NA	0	1-15 years	36.8	1	1	R1_Jul_2013
1123	498	71.62504479	178.6636073	137.3632485	4955.455502	149.352828	13199.34002	17671.13179	577	84	27/07/2013	2013-07	Monthly	0	NA	0	>15 years	36.5	1	1	R1_Jul_2013
1124	499	124.9927252	236.6565891	99.7138595	58.89750638	17.57092094	72.53556822	43.09260778	23	87	27/07/2013	2013-07	Monthly	0	NA	0	1-15 years	36.5	1	1	R1_Jul_2013
1125	500	351.1031607	1569.967088	1147.633871	339.6005155	1426.339781	5773.689003	3070.196301	6331.796163	109	27/07/2013	2013-07	Monthly	0	NA	0	>15 years	35.6	1	1	R1_Jul_2013
1126	503	322.795347	376.0081465	1616.215662	2855.387663	1200.439286	684.6220026	5578.143762	19186.26798	166	17/12/2013	2013-12	Monthly	0	NA	0	>15 years	35.2	1	1	R1_Dec_2013
1127	504	54.00856	349.22067	95.0757728	415.2753574	517.5667243	294.7678067	2274.913578	269.9773363	117	17/12/2013	2013-12	Monthly	0	NA	0	>15 years	35.4	1	1	R1_Dec_2013
1128	505	48.98450791	79.31966578	643.9193567	37.98668829	16.25681356	111.7265074	42.57276901	648.7720682	51	17/12/2013	2013-12	Monthly	0	NA	0	>15 years	36.3	1	1	R1_Dec_2013
1129	506	42	1107.454951	66.5	57	15	126.4624738	481	411.5	65	17/12/2013	2013-12	Monthly	0	NA	0	1-15 years	36	1	1	R1_Dec_2013
1130	503	342.6766849	411.1885512	1331.24849	1856.742223	870.5623461	593.0849401	4226.915205	20195.79416	189	27/07/2013	2013-07	Monthly	0	NA	0	>15 years	36.2	1	1	R1_Jul_2013
1131	507	47	218.886209	39.56234422	327.6694076	1353.922027	2842.179006	1455.61607	9687.757099	68	16/12/2013	2013-12	Monthly	0	NA	0	>15 years	35.6	1	1	R1_Dec_2013
1132	508	49	336.765811	178.821689	166	34	184.2738903	25	22	90	17/12/2013	2013-12	Monthly	0	NA	0	1-15 years	36.6	1	0	R1_Dec_2013
1133	509	11673.20993	3147.916707	1097.56136	1885.866828	2161.896944	10493.67541	21046.66755	37276.46303	456	17/12/2013	2013-12	Monthly	0	NA	0	>15 years	36.7	1	1	R1_Dec_2013
1134	510	59	739.2623222	278.9837765	7241.449234	2075.659432	9763.806278	13415.74741	451	155	17/12/2013	2013-12	Monthly	0	NA	0	1-15 years	37	1	1	R1_Dec_2013
1135	509	1556.032519	947.1651201	338.8020847	1916.728832	1867.20602	9714.077077	5748.221267	6932.043099	293	27/07/2013	2013-07	Monthly	0	NA	0	>15 years	36.9	1	1	R1_Jul_2013
1136	508	74.43387007	325.0835472	185.2923871	726.1961772	21.96365117	141.5154713	55.40478143	28	163.5	27/07/2013	2013-07	Monthly	0	NA	0	1-15 years	36.5	1	0	R1_Jul_2013
1137	507	89.18020282	206.7478532	102.2706251	1077.251627	2821.537049	6725.896119	2162.325497	16393.93737	85	27/07/2013	2013-07	Monthly	0	NA	0	>15 years	35.8	1	1	R1_Jul_2013
1138	510	92.69123443	546.481029	218.8554654	6378.075008	1717.959947	7956.86738	10904.86333	500	178	27/07/2013	2013-07	Monthly	0	NA	0	1-15 years	36.5	1	1	R1_Jul_2013
1139	511	213.522214	327.1019909	209.6464494	1129.854703	488.4219372	1060.21324	2950.87562	1342.999504	229.5	17/12/2013	2013-12	Monthly	0	NA	0	>15 years	36.3	1	1	R1_Dec_2013
1140	512	782	660.9103681	259.8490478	1157.599998	1267.566219	6113.557303	3940.738218	3975.495778	155.5	17/12/2013	2013-12	Monthly	0	NA	0	1-15 years	35.4	1	1	R1_Dec_2013
1141	513	79.5	357.2594779	298.1109775	65	28	3480.427939	79	23	125	17/12/2013	2013-12	Monthly	0	NA	0	1-15 years	36	1	1	R1_Dec_2013
1142	511	251.3898631	369.9206483	329.2028602	1337.89775	488.2180456	1418.710378	4165.132104	994	312.5	27/07/2013	2013-07	Monthly	0	NA	0	>15 years	35.5	1	1	R1_Jul_2013
1143	513	101.1177103	643.5449653	337.0021836	92.73224408	26.3563814	3676.557722	227.7752125	30	127	27/07/2013	2013-07	Monthly	0	NA	0	1-15 years	36.4	1	1	R1_Jul_2013
1144	514	81.45593329	236.6565891	148.1455903	288.2218397	37.65197343	982.074703	840.3058517	43	130	27/07/2013	2013-07	Monthly	0	NA	0	>15 years	35.5	1	1	R1_Jul_2013
1145	515	176.4698298	172.4911692	368.6789561	255.0741175	2106.512754	11131.28721	3111.65902	3278.692857	222.5	16/12/2013	2013-12	Monthly	0	NA	0	>15 years	36.4	1	1	R1_Dec_2013
1146	516	90.88077954	20.64294453	14.46318541	82.95359694	18.25727618	103.7131592	37.1857656	20.14135592	397	27/06/2013	2013-06	Monthly	1	0	0	1-15 years	36.8	1	1	NA
1147	516	92.29197177	213.7762161	11.43505382	79.73834124	14.86663917	98.31767692	38.53797525	23.59415979	417	27/07/2013	2013-07	Monthly	0	NA	0	1-15 years	35.8	1	1	R1_Jul_2013
1148	516	75.92214191	198.3029761	13.17058871	88.74105719	NA	NA	NA	15.24988377	213.5	24/08/2013	2013-08	Monthly	1	2	0	1-15 years	36.8	1	1	NA
1149	516	69.43065766	8.163995123	5.278195055	63.01901163	12.51927509	79.73323799	30.76276972	15.53761742	342	25/09/2013	2013-09	Monthly	0	NA	0	1-15 years	36.3	1	1	NA
1150	516	79.02676482	150.6127239	13.0119074	80.38139238	15.64909387	106.1111513	47.66539045	25.32056172	413	29/10/2013	2013-10	Monthly	1	0	0	1-15 years	38.4	1	1	NA
1151	516	102.1703174	5.283914048	8.35322539	76.52308555	15.12745741	97.11868086	39.21408008	23.01869248	399	26/11/2013	2013-11	Monthly	0	NA	0	1-15 years	36.1	1	1	NA
1152	516	59.8345505	10.14902027	9.626590114	43.72747745	10.43272924	50.95733255	26.36808833	21.86775785	198.5	16/12/2013	2013-12	Monthly	0	NA	0	1-15 years	36.1	1	1	R1_Dec_2013
1153	517	26	84	66.35195655	22	35.8669209	25.5	26	15	30	27/06/2013	2013-06	Monthly	1	0	0	1-15 years	36.6	1	1	NA
1154	517	24	68.5	79.9626143	31	39.94270736	38	25	36	39	26/07/2013	2013-07	Monthly	0	NA	0	1-15 years	36.6	1	1	R1_Jul_2013
1155	517	932	562.895951	134.4052453	153	314.2879635	2177	810	6508.599699	70.5	23/08/2013	2013-08	Monthly	1	1	1	1-15 years	36.7	1	1	NA
1156	517	76	360.5364499	137.8079098	89	68.47321262	2004	372	188.5	50	29/10/2013	2013-10	Monthly	0	NA	0	1-15 years	36.9	1	1	NA
1157	517	45	147	116.541257	65	44.01849383	1047	263	79.5	55	26/11/2013	2013-11	Monthly	0	NA	0	1-15 years	36.5	1	1	NA
1158	517	49.5	377.3455201	127.5999164	72	60.32163969	1155	311	56.5	58.5	16/12/2013	2013-12	Monthly	0	NA	0	1-15 years	35.6	1	1	R1_Dec_2013
1159	518	25	157	79.9626143	53	24.45471879	31	20	16	39	27/06/2013	2013-06	Monthly	0	NA	0	1-15 years	37.6	1	1	NA
1160	518	29	159	103.7812654	56	68.47321262	36	22	18	56	27/07/2013	2013-07	Monthly	0	NA	0	1-15 years	36	1	1	R1_Jul_2013
1161	518	52	350.1297752	99.99541366	81	78.25510014	56.5	30	24	101	23/08/2013	2013-08	Monthly	0	NA	0	1-15 years	36.8	1	1	NA
1162	518	45	418.9586888	135.2559114	92	112.4917064	59	26	19	80	25/09/2013	2013-09	Monthly	1	2	0	1-15 years	37.4	1	1	NA
1163	518	27	141	85.06661096	65.5	32.60629172	34	19	16	43	29/10/2013	2013-10	Monthly	0	NA	0	1-15 years	36.7	1	1	NA
1164	518	29	142	115.6905909	66	29.34566255	36.5	24	20	69	26/11/2013	2013-11	Monthly	0	NA	0	1-15 years	36.7	1	1	NA
1165	518	32	370.1418934	112.2879265	61	29.34566255	41	24	21	70.5	16/12/2013	2013-12	Monthly	0	NA	0	1-15 years	35.9	1	1	R1_Dec_2013
1166	516	11	13	36.57864271	11	11.4122021	13	10	10	213.5	24/08/2013	2013-08	Monthly	1	2	0	1-15 years	36.8	1	1	NA
1167	519	36	162	520.6537985	556.400213	299.4047095	566	4320.138409	228.1709897	77.5	27/07/2013	2013-07	Monthly	0	NA	0	>15 years	35.8	1	1	R1_Jul_2013
1168	519	344	9532.555673	615.5870707	7442.489979	5774.681201	6088	5625.839199	31418.63	288	23/08/2013	2013-08	Monthly	1	1	1	>15 years	37	1	1	NA
1169	519	77	1811.128718	2215.983029	12168.35143	1316.237202	4938.5	4802.031725	10388.49132	110.5	26/09/2013	2013-09	Monthly	0	NA	0	>15 years	36.3	1	1	NA
1170	519	41	480.9757677	1801.47012	6350.73174	558.1125304	2498	3310.289344	3119.185108	84	29/10/2013	2013-10	Monthly	0	NA	0	>15 years	36.3	1	1	NA
1171	520	60	131	179.4864391	100.9690804	15.28729343	136	739.809676	28.60263119	85	29/10/2013	2013-10	Monthly	0	NA	0	1-15 years	36.3	1	0	NA
1172	519	45.5	460.7816036	2360.076548	6052.175922	670.8876149	2916	4600.266264	2304.162297	111.5	27/11/2013	2013-11	Monthly	0	NA	0	>15 years	36.6	1	1	NA
1173	517	40	210.668638	38.97186147	48.14197181	11.44666771	706.6924804	323.6793328	39	58.5	16/12/2013	2013-12	Monthly	0	NA	0	1-15 years	35.6	1	1	R1_Dec_2013
1174	521	104	789.6878154	55.91303514	5820.94959	8.005993505	1035.065377	6024.708932	501	207	16/12/2013	2013-12	Monthly	0	NA	0	>15 years	35.8	1	0	R1_Dec_2013
1175	522	48.98450791	118.4507009	52.12073255	37.98668829	16.25681356	39.22313556	25.76772861	34.43588473	40	16/12/2013	2013-12	Monthly	0	NA	0	1-15 years	36.6	1	1	R1_Dec_2013
1176	523	57.77659907	190.8959957	83.58985409	327.6526836	25.73995481	1662.823232	8248.216948	1281.703629	77	16/12/2013	2013-12	Monthly	0	NA	0	>15 years	35.1	1	1	R1_Dec_2013
1177	524	40.5	382.5323025	208.2986261	501.6736833	14	153.5615753	28	23	112	16/12/2013	2013-12	Monthly	0	NA	0	>15 years	35.6	1	1	R1_Dec_2013
1178	525	124.9927252	298.7877192	181.6969925	149.1234736	32.63171031	135.1152741	70.02548764	32	205.5	27/07/2013	2013-07	Monthly	0	NA	0	1-15 years	36.4	1	1	R1_Jul_2013
1179	526	290.7134171	989.8266795	192.4835431	363.4488529	3026.345045	398.2344922	4424.604437	5920.347834	191	27/07/2013	2013-07	Monthly	1	2	0	>15 years	37	1	1	R1_Jul_2013
1180	521	169.9339298	747.8727535	294.4106911	4748.943123	259.0381661	1368.219934	4362.829548	536.5	256.5	27/07/2013	2013-07	Monthly	0	NA	0	>15 years	36.8	1	0	R1_Jul_2013
1181	527	109.5441861	264.1339506	221.8527237	1616.294543	826.2830621	8907.65223	6821.218853	4498.681836	149	27/07/2013	2013-07	Monthly	0	NA	0	>15 years	36.5	1	1	R1_Jul_2013
1182	522	44.94120457	137.4335441	70.31105478	46.36612204	15.06078937	51.20157756	36.93652095	28	52	27/07/2013	2013-07	Monthly	0	NA	0	1-15 years	36.7	1	1	R1_Jul_2013
1183	524	207.8530711	479.4117679	323.2036528	3294.43002	143.7050319	4138.083053	25520.2209	820.5	301	27/07/2013	2013-07	Monthly	0	NA	0	>15 years	36.4	1	1	R1_Jul_2013
1184	528	76	75	64	127.4948557	61.1491737	1245	4787.800548	6600.554677	46	26/06/2013	2013-06	Monthly	1	2	1	>15 years	36.3	1	1	NA
1185	528	299	431.3989002	316.8994597	285.8477495	220.0516957	2286	8963.145264	12871.68197	157	24/08/2013	2013-08	Monthly	0	NA	NA	>15 years	36	1	1	NA
1186	528	203	169	248.239256	217.3572986	101.3788932	2009	7868.684205	10844.71033	126	26/09/2013	2013-09	Monthly	0	NA	0	>15 years	36.6	1	1	NA
1187	528	186	174	223.0962482	202.9395828	88.50538299	1973	7158.488227	11218.75854	108	30/10/2013	2013-10	Monthly	0	NA	0	>15 years	36.3	1	1	NA
1188	528	159	153	226.4493561	197.6598099	69.19511761	1533	6030.36432	8885.455584	113	26/11/2013	2013-11	Monthly	0	NA	0	>15 years	36.8	1	1	NA
1189	528	254	2432.608867	1586.408157	233.5979571	672.4540314	4716	1074.931966	6866.846557	120	17/12/2013	2013-12	Monthly	0	NA	0	>15 years	36.8	1	1	R1_Dec_2013
1190	529	211.6381944	705.3514117	516.5733762	1129.273614	781.3334224	683.4334227	1482.204563	442.1567599	458	17/12/2013	2013-12	Monthly	0	NA	0	>15 years	35.2	1	1	R1_Dec_2013
1191	530	132.509374	192.482389	79.16450888	66.72020892	25.73995481	76.66340133	29.12873669	35.81332011	85.5	16/12/2013	2013-12	Monthly	0	NA	0	1-15 years	36.6	1	1	R1_Dec_2013
1192	531	47.72849488	197.4617585	70.24182299	62.3371295	41.99676837	78.44627113	34.73041682	39.94562628	101	16/12/2013	2013-12	Monthly	0	NA	0	1-15 years	36.3	1	1	R1_Dec_2013
1193	532	42	446.7230344	83.5	82	1244.988274	170.7243396	12099.33893	28	109	16/12/2013	2013-12	Monthly	0	NA	0	1-15 years	36.1	1	1	R1_Dec_2013
1194	533	55	184	203.8779246	3622.286005	1997.175221	8850.566557	10187.09059	8535.553935	102	17/12/2013	2013-12	Monthly	0	NA	0	>15 years	35.8	1	1	R1_Dec_2013
1195	534	299	575.014686	284.8698922	110	403.2625185	214.9862054	743	1144.5	140	17/12/2013	2013-12	Monthly	0	NA	0	>15 years	36.7	1	1	R1_Dec_2013
1196	530	79.72551275	279.1131479	101.3577557	137.2904092	48.40239199	96.47239038	71.19607022	32	115	26/07/2013	2013-07	Monthly	0	NA	0	1-15 years	36.3	1	1	R1_Jul_2013
1197	535	97.05714596	372.2388504	329.3556682	2260.22887	532.4696968	2159.758655	10994.09354	3373.398929	76	26/07/2013	2013-07	Monthly	0	NA	0	NA	35.9	1	1	R1_Jul_2013
1198	536	60.66071622	297.2462916	94.13836312	114.4086743	30.97753088	59.78570672	63.28539575	29	91	26/07/2013	2013-07	Monthly	0	NA	0	1-15 years	35	1	1	R1_Jul_2013
1199	529	322.3683776	768.899133	608.6530743	1499.017036	1014.370394	870.9690456	1928.226902	351	471	26/07/2013	2013-07	Monthly	0	NA	0	>15 years	35.2	1	1	R1_Jul_2013
1200	532	114.3887792	379.5000452	145.4793369	239.3048105	1622.025971	218.7613359	14054.82162	39	169	26/07/2013	2013-07	Monthly	0	NA	0	1-15 years	36	1	1	R1_Jul_2013
1201	533	100.415504	262.9391643	160.1271028	3935.62484	2437.042097	8385.680592	10419.98668	10067.2008	120	26/07/2013	2013-07	Monthly	0	NA	0	>15 years	35	1	1	R1_Jul_2013
1202	537	72.33121837	307.1044201	213.6972041	184	797.6244472	142.8063123	2565.472457	3334.658029	155	26/07/2013	2013-07	Monthly	0	NA	0	>15 years	35.2	1	1	R1_Jul_2013
1203	538	81.84914928	51.08325294	14.5536036	48.87188657	8.346183396	212.2223026	196.7465052	39.13177721	91	27/06/2013	2013-06	Monthly	0	NA	0	1-15 years	35.5	1	1	NA
1204	538	137.1678846	9.994706208	11.20141201	99.67292655	12.51927509	320.731446	242.3835812	51.21659076	194	27/07/2013	2013-07	Monthly	0	NA	0	1-15 years	35.5	1	1	R1_Jul_2013
1205	538	116.5644781	11.60908396	5.287693585	95.81461972	12.51927509	302.7465051	233.5942184	48.91472151	189	23/08/2013	2013-08	Monthly	1	2	0	1-15 years	37.2	1	1	NA
1206	538	76.76885725	51.73537958	10.48699029	47.58578429	8.867819858	177.4514169	151.4474817	119.1217336	94	25/09/2013	2013-09	Monthly	0	NA	0	1-15 years	35.4	1	1	NA
1207	538	84.67153373	60.43040136	7.397753353	54.65934682	8.867819858	193.6378637	157.5324252	66.75420818	96	29/10/2013	2013-10	Monthly	0	NA	0	1-15 years	35.4	1	1	NA
1208	538	145.3527996	13.75042877	10.48446669	99.99445212	12.51927509	303.3460032	237.312795	81.14089098	193.5	26/11/2013	2013-11	Monthly	0	NA	0	1-15 years	36.3	1	1	NA
1209	538	123.0559624	9.184310307	6.588239441	91.31326174	12.51927509	236.5019728	168.3501024	49.49018882	170.5	16/12/2013	2013-12	Monthly	0	NA	0	1-15 years	36	1	1	R1_Dec_2013
1210	539	19.7566912	14.17445257	27.35598868	23.14984101	6.781274009	28.17640741	18.25483038	56.97126388	65	27/06/2013	2013-06	Monthly	0	NA	0	1-15 years	36.3	1	1	NA
1211	539	26.5304139	4.109480597	37.99442872	34.08171037	8.867819858	41.9648621	27.72029799	81.71635829	97	27/07/2013	2013-07	Monthly	0	NA	0	1-15 years	37.1	1	1	R1_Jul_2013
1212	539	34.43309038	7.424508164	12.13038754	41.79832404	9.911092783	59.35030497	29.74861248	76.53715248	142	23/08/2013	2013-08	Monthly	1	2	0	1-15 years	37.1	1	1	NA
1213	539	27.09489079	9.305880483	10.1634923	36.01086379	9.911092783	47.66009338	24.67782626	48.3392542	118	25/09/2013	2013-09	Monthly	0	NA	0	1-15 years	36.8	1	1	NA
1214	539	25.96593701	10.80264276	10.30368647	35.36781265	8.346183396	47.36034437	24.33977384	44.31098302	110	29/10/2013	2013-10	Monthly	0	NA	0	1-15 years	36.5	1	1	NA
1215	539	34.43309038	10.53222466	6.417648005	42.44137518	10.43272924	55.75331679	30.42471731	44.88645033	152	26/11/2013	2013-11	Monthly	0	NA	0	1-15 years	35	1	1	NA
1216	539	38.94890552	6.924558934	13.81697134	47.58578429	11.99763863	60.84905004	35.15745111	51.79205807	169.5	16/12/2013	2013-12	Monthly	0	NA	0	1-15 years	35.8	1	1	R1_Dec_2013
1217	540	136	1541.801614	1872.513653	5969.641619	8.350686214	1233.789428	23742.11023	1201.5	122	16/12/2013	2013-12	Monthly	0	NA	0	>15 years	36.4	1	1	R1_Dec_2013
1218	541	55.26457302	186.1368157	75.72257371	62.3371295	18.96628249	135.4981047	58.25747338	39.25690859	75.5	16/12/2013	2013-12	Monthly	0	NA	0	1-15 years	36.6	1	1	R1_Dec_2013
1219	542	87.92091163	108.932341	230.516049	43.83079418	27.09468927	572.3012053	1166.269804	56.47485095	277	16/12/2013	2013-12	Monthly	0	NA	0	>15 years	35.8	1	1	R1_Dec_2013
1220	543	1430.937424	375.4256628	103.7421325	123.7002414	104.3145537	19545.19755	275.6026625	378.1060143	132.5	16/12/2013	2013-12	Monthly	0	NA	0	1-15 years	37.1	1	1	R1_Dec_2013
1221	540	132.4945682	1084.085674	1981.444226	5047.817349	164.5	1556.723527	21772.51587	2435.114733	109	27/07/2013	2013-07	Monthly	0	NA	0	>15 years	36.1	1	1	R1_Jul_2013
1222	542	292.7048369	403.3757506	863.5422893	143	42	1650.355968	3473.621207	116	811.5	27/07/2013	2013-07	Monthly	0	NA	0	>15 years	36.5	1	1	R1_Jul_2013
1223	541	156.8303052	494.925495	324.4042651	214	28	485.0025701	217.8257712	49	210	27/07/2013	2013-07	Monthly	0	NA	0	1-15 years	36.7	1	1	R1_Jul_2013
1224	543	89.23103574	542.7426691	245.3727729	173	49	497.1276344	82.28973579	43	171	27/07/2013	2013-07	Monthly	0	NA	0	1-15 years	36.2	1	1	R1_Jul_2013
1225	544	222.6861337	182.9435603	12.209824	157.8690546	26.08182311	282.9630702	41.24239457	24.74509441	361	26/07/2013	2013-07	Monthly	0	NA	0	1-15 years	35.8	1	1	R1_Jul_2013
1226	544	201.2360118	137.3613136	11.21607318	101.8412949	28.16836896	284.7615642	48.67954769	27.62243097	376	23/08/2013	2013-08	Monthly	0	NA	0	1-15 years	36.2	1	1	NA
1227	544	134.0632617	34.31663978	16.88214299	115.749205	17.73563972	178.950162	32.45303179	16.68855205	215.5	25/09/2013	2013-09	Monthly	1	2	0	1-15 years	39	1	1	NA
1228	544	101.0413636	7.921121112	8.683644258	90.34868503	14.08418448	148.6755114	29.07250765	16.11308473	188	29/10/2013	2013-10	Monthly	1	0	0	1-15 years	37.6	1	1	NA
1229	544	318.0827284	409.8183151	14.08542201	106.4393982	26.08182311	284.7615642	58.1450153	25.03282807	366	26/11/2013	2013-11	Monthly	0	NA	0	1-15 years	36.8	1	1	NA
1230	544	175.5523133	101.5814069	10.38604885	123.4658187	17.73563972	187.6428834	35.83355594	20.14135592	222	16/12/2013	2013-12	Monthly	0	NA	0	1-15 years	36.3	1	1	R1_Dec_2013
1231	545	116.8092112	452.9564974	173.7264807	221.589015	42.6741356	273.3733691	54.8964653	46.83280323	175	16/12/2013	2013-12	Monthly	0	NA	0	1-15 years	36.3	1	1	R1_Dec_2013
1232	546	43.96045581	118.4507009	59.98801294	41.88275889	16.25681356	57.05183355	128.838643	59.22972173	60	16/12/2013	2013-12	Monthly	0	NA	0	1-15 years	36.5	1	1	R1_Dec_2013
1233	547	46.47248186	129.0266563	49.17050241	38.96070594	14.9020791	39.22313556	24.08722457	28.92614317	42	16/12/2013	2013-12	Monthly	0	NA	0	1-15 years	35.4	1	1	R1_Dec_2013
1234	548	64.05666419	222.4403265	78.90328485	59.41507656	2236.884353	792.7827703	12264.82899	633.620279	70	16/12/2013	2013-12	Monthly	0	NA	0	>15 years	36.4	1	1	R1_Dec_2013
1235	549	22	101	56	102	15	135.4955076	121	123	49.5	16/12/2013	2013-12	Monthly	0	NA	0	>15 years	35.4	1	1	R1_Dec_2013
1236	550	67	166	262.7933238	59	24	2596.093926	69	23	109	16/12/2013	2013-12	Monthly	0	NA	0	>15 years	36.6	1	1	R1_Dec_2013
1237	549	171.0261518	666.3103553	508.5893478	970.7088881	47	835.2822041	526.0088993	411	360.5	26/07/2013	2013-07	Monthly	0	NA	0	>15 years	36.7	1	1	R1_Jul_2013
1238	545	164.9422176	478.7787349	316.5127977	221	39	292.3487714	85.51678425	36	205.5	27/07/2013	2013-07	Monthly	0	NA	0	1-15 years	35.5	1	1	R1_Jul_2013
1239	550	183.870013	538.5602208	423.8554923	227	25	1682.689472	183.9417623	285	285	27/07/2013	2013-07	Monthly	0	NA	1	>15 years	36.8	1	1	R1_Jul_2013
1240	546	158.1822906	459.6365973	286.7435099	183	25	303.1266063	607.491873	95	208	27/07/2013	2013-07	Monthly	0	NA	0	1-15 years	36.3	1	1	R1_Jul_2013
1241	547	331.9124133	496.7193236	253.8953282	193	22	206.1260923	106.4925993	49	173	27/07/2013	2013-07	Monthly	0	NA	0	1-15 years	36.8	1	1	R1_Jul_2013
1242	548	75.03518915	333.890705	205.773714	67	2884.614837	1137.735196	13662.14999	549	72.5	26/07/2013	2013-07	Monthly	0	NA	0	>15 years	36.3	1	1	R1_Jul_2013
1243	551	59	280.1444655	42.08285669	193.4936944	27.92986922	56.32285934	3116.354507	1038	75.5	16/12/2013	2013-12	Monthly	0	NA	0	>15 years	36	1	1	R1_Dec_2013
1244	552	54.00856	172.4911692	74.73916366	91.55765896	20.32101695	116.4808268	1140.502075	33.05844934	70.5	16/12/2013	2013-12	Monthly	0	NA	0	>15 years	35.8	1	1	R1_Dec_2013
1245	553	94	750.8425399	227.4513384	121	45	1338.695615	208	27.5	128	16/12/2013	2013-12	Monthly	0	NA	0	1-15 years	36.5	1	1	R1_Dec_2013
1246	554	92.5	483.5863737	277.5121357	560.4475534	38	516.6895357	492	23	138	16/12/2013	2013-12	Monthly	0	NA	0	1-15 years	36.6	1	1	R1_Dec_2013
1247	555	161.5074539	374.1064435	222.4521866	337.5097474	33.88677609	699.7548934	183.1435831	28	216	27/07/2013	2013-07	Monthly	0	NA	0	1-15 years	36.3	1	1	R1_Jul_2013
1248	553	139.0368516	515.338094	126.5818327	129.0732587	47.69249968	978.5190379	293.1836351	33	124	27/07/2013	2013-07	Monthly	0	NA	0	1-15 years	36.3	1	1	R1_Jul_2013
1249	554	164.3162792	380.0864589	166.1183218	461.7929942	43.92730234	591.6626741	1150.418726	31	115	27/07/2013	2013-07	Monthly	0	NA	0	1-15 years	36.2	1	1	R1_Jul_2013
1250	552	72.32725111	210.3330761	104.8273908	127.8201202	21.33611828	159.2937969	1554.411923	27	88	27/07/2013	2013-07	Monthly	0	NA	0	>15 years	36.3	1	1	R1_Jul_2013
1251	551	126.3971379	332.2562084	284.8142034	426.796272	102.915394	130.848476	3087.496443	2579.898662	111	27/07/2013	2013-07	Monthly	0	NA	0	>15 years	36.2	1	1	R1_Jul_2013
1252	556	98.308885	402.8138991	204.4699163	616.3040156	2826.925843	792.2021862	11940.38103	3373.570774	221	27/07/2013	2013-07	Monthly	0	NA	0	>15 years	35.8	1	1	R1_Jul_2013
1253	557	87.07358386	308.3491379	120.5925434	139.0983661	32.63171031	177.7832554	52.32673802	35	110	27/07/2013	2013-07	Monthly	0	NA	0	1-15 years	36.6	1	1	R1_Jul_2013
1254	558	847.7137904	370.2605921	215.5918193	5119.946371	1851.959583	2700.018566	2811.351264	4281.805396	67	27/06/2013	2013-06	Monthly	0	NA	1	>15 years	36.6	1	1	NA
1255	558	1421.28466	613.4979725	366.1167854	6587.279935	2418.121659	3640.842279	3782.15189	5899.963502	195.5	27/07/2013	2013-07	Monthly	0	NA	0	>15 years	36.9	1	1	R1_Jul_2013
1256	558	1242.958682	623.7894892	374.3164053	6135.73459	2395.886536	3443.827004	3568.218271	5684.83336	205	24/08/2013	2013-08	Monthly	1	2	NA	>15 years	35.8	1	1	NA
1257	558	1593.164515	775.6668468	428.1524272	7426.41203	2885.461616	4367.070892	4248.814567	6790.17464	240	25/09/2013	2013-09	Monthly	0	NA	0	>15 years	36.5	1	1	NA
1258	558	444.4841538	231.892185	67	2815.153366	1040.53536	1484.585871	1652.864758	2549.729891	43	29/10/2013	2013-10	Monthly	0	NA	0	>15 years	36.6	1	1	NA
1259	558	1632.431115	658.0820302	379.0010904	5943.022853	2327.234277	3311.069019	3256.833893	5420.646702	215	26/11/2013	2013-11	Monthly	0	NA	0	>15 years	36.5	1	1	NA
1260	558	1771.682254	723.1832547	381.3432081	6818.60716	2821.039863	3987.589162	3701.838695	6375.485307	196	16/12/2013	2013-12	Monthly	0	NA	0	>15 years	36.6	1	1	R1_Dec_2013
1261	558	3055.959137	687.9757264	43.33974211	5095.452692	1438.370867	2838.459572	3643.531317	4455.67434	196	16/12/2013	2013-12	Monthly	0	NA	0	>15 years	36.6	1	1	R1_Dec_2013
1262	559	726	1468.98018	2843.830429	94.89523289	29.80690931	20951.75985	3291.52884	38.5	130	16/12/2013	2013-12	Monthly	0	NA	0	1-15 years	36.3	1	1	R1_Dec_2013
1263	560	896.5	6393.757213	84	72.5	20	9341.060295	74	119	93.5	16/12/2013	2013-12	Monthly	0	NA	0	1-15 years	36	1	1	R1_Dec_2013
1264	559	73.68320376	1582.25148	555.7216616	76	24	761.8582039	93.5844054	27	138	27/07/2013	2013-07	Monthly	0	NA	0	1-15 years	36.4	1	1	R1_Jul_2013
1265	558	912.5901383	554.0934711	314.6912967	6016.854404	2140.503156	3543.213221	3448.402654	5040.455295	195.5	27/07/2013	2013-07	Monthly	0	NA	0	>15 years	36.9	1	1	R1_Jul_2013
1266	561	770.6316723	642.4457765	332.9010219	7106.561675	13124.24432	17903.36365	7390.037105	13147.97265	179	27/07/2013	2013-07	Monthly	1	2	0	>15 years	35.2	1	1	R1_Jul_2013
1267	562	51.37544482	277.7365111	252.6779723	59	138.5	3702.186285	17753.75304	124	96	27/07/2013	2013-07	Monthly	0	NA	0	>15 years	36.9	1	1	R1_Jul_2013
1268	560	48.43061133	193.3877929	82.92069139	55.61821039	29.17970615	62.57643724	23.29869537	16.02907646	84.5	27/07/2013	2013-07	Monthly	0	NA	0	1-15 years	35	1	1	R1_Jul_2013
1269	563	10.72506094	54.7786372	17.3688817	16.07627848	5.738001085	15.88669779	12.84599175	9.782944302	29	27/06/2013	2013-06	Monthly	0	NA	1	1-15 years	36.8	1	1	NA
1270	563	14.67639918	10.35820936	26.92176664	25.07899442	6.781274009	22.48117612	19.60704004	16.11308473	68	27/07/2013	2013-07	Monthly	0	NA	0	1-15 years	35.8	1	1	R1_Jul_2013
1271	563	22.01459877	9.536833484	27.35598868	25.72204556	7.302910471	22.78092514	20.28314487	15.24988377	64	23/08/2013	2013-08	Monthly	0	NA	0	1-15 years	36.1	1	1	NA
1272	563	13.82968384	5.103185875	21.27688008	26.3650967	6.259637547	17.38544287	14.87430624	10.93387893	39	25/09/2013	2013-09	Monthly	0	NA	0	1-15 years	36.6	1	1	NA
1273	563	15.24087607	9.229490556	21.27688008	25.07899442	6.781274009	19.78343499	16.2265159	10.93387893	45	29/10/2013	2013-10	Monthly	0	NA	0	1-15 years	35.3	1	1	NA
1274	563	20.3211681	9.41996904	28.22443276	27.00814784	7.824546934	25.17891726	18.93093521	14.96215011	68	26/11/2013	2013-11	Monthly	0	NA	0	1-15 years	36.3	1	1	NA
1275	563	18.62773742	74.77718729	26.05332255	26.3650967	7.302910471	23.38042317	20.9592497	13.23574817	58	16/12/2013	2013-12	Monthly	0	NA	0	1-15 years	36.3	1	1	R1_Dec_2013
1276	564	96.24331001	64.77791225	12.14347576	66.87731846	30.25491481	68.0430264	3136.177431	322.5257008	72	27/06/2013	2013-06	Monthly	0	NA	0	>15 years	37	1	1	NA
1277	564	204.9051116	9.805344757	7.536970889	151.7600688	47.46891806	182.8468991	5477.765789	564.9597568	194	27/07/2013	2013-07	Monthly	0	NA	0	>15 years	35.3	1	1	R1_Jul_2013
1278	564	146.1995149	7.223904307	13.82701349	103.5312334	32.86309712	131.2900686	4207.749173	410.9474706	143	23/08/2013	2013-08	Monthly	1	2	0	>15 years	36.6	1	1	NA
1279	564	124.1849161	8.849190219	8.484578421	103.5312334	27.6467325	133.6880607	3712.138699	321.6602011	123.5	25/09/2013	2013-09	Monthly	0	NA	0	>15 years	36.9	1	1	NA
1280	564	116.8467166	11.48941447	8.819429056	87.45495491	27.12509604	100.715669	3334.791597	300.8201891	115	29/10/2013	2013-10	Monthly	0	NA	0	>15 years	35.8	1	1	NA
1281	564	144.5060842	12.2587248	10.57138051	95.17156858	26.60345957	106.7106493	4130.374407	364.3660902	167	26/11/2013	2013-11	Monthly	0	NA	0	>15 years	36.3	1	1	NA
1282	564	197.8491505	9.314556419	14.97479611	127.9671767	36.51455236	147.4765154	5214.606938	476.8441598	191	16/12/2013	2013-12	Monthly	0	NA	0	>15 years	36.3	1	1	R1_Dec_2013
1283	565	187	574.5343541	402.1701491	210.4948625	17.7010766	407	35.68991896	54.60502317	297	27/06/2013	2013-06	Monthly	0	NA	1	1-15 years	35.3	1	1	NA
1284	565	377	1077.048544	836.426264	375.0882043	31.37918124	809	66.84298381	89.70825235	630	27/07/2013	2013-07	Monthly	0	NA	0	1-15 years	36.3	1	1	R1_Jul_2013
1285	565	263.5	814.32655	645.5306447	257.9094174	25.74702051	619	52.62750762	70.20645836	453.5	23/08/2013	2013-08	Monthly	0	NA	NA	1-15 years	36.3	1	1	NA
1286	565	254.5	726.5521029	562.3120115	220.9617874	22.52864294	546	45.36854105	67.60621917	423	25/09/2013	2013-09	Monthly	0	NA	0	1-15 years	35.3	1	1	NA
1287	565	260	779.594778	526.4878922	247.9963251	25.74702051	543	56.86190478	75.40693676	399	29/10/2013	2013-10	Monthly	0	NA	0	1-15 years	36	1	1	NA
1288	565	209	1080.691143	758.494787	3274.753965	116.6661867	3206	20375.3548	1400.228808	455.5	16/12/2013	2013-12	Monthly	0	NA	0	1-15 years	35.4	1	1	R1_Dec_2013
1289	566	869.0064444	880.4805696	539.0336034	555.9888265	28	7975.178325	2332.213302	2923.862876	146	27/06/2013	2013-06	Monthly	0	NA	1	1-15 years	35.5	1	1	NA
1290	566	1200.373373	1541.484706	951.0713325	859.6409013	54	10201.14783	2658.183444	3448.857979	466.5	27/07/2013	2013-07	Monthly	1	2	0	1-15 years	35.8	1	1	R1_Jul_2013
1291	566	1876.02516	5143.127529	1170.94041	1542.768551	69	17897.72185	5650.067421	4503.574296	335	25/09/2013	2013-09	Monthly	0	NA	0	1-15 years	36.6	1	1	NA
1292	566	829.082718	1201.467627	542.5275778	879.8309597	38	11717.97999	3729.648516	2230.81177	274	29/10/2013	2013-10	Monthly	0	NA	0	1-15 years	35.4	1	1	NA
1293	566	996.0969734	1292.913462	703.8136386	994.5276136	58	11808.32342	3781.534403	1783.951197	496	26/11/2013	2013-11	Monthly	0	NA	0	1-15 years	36	1	1	NA
1294	566	1432.857561	1517.922249	746.5468501	1092.688894	68	11984.89996	3778.446899	1808.388884	550	16/12/2013	2013-12	Monthly	0	NA	0	1-15 years	36.1	1	1	R1_Dec_2013
1295	567	2608.421705	380.9448552	64.71932235	1244.65986	1402.925757	8670.532252	5605.501543	21525.55482	88	16/12/2013	2013-12	Monthly	0	NA	0	>15 years	35.8	1	1	R1_Dec_2013
1296	568	724	477.0120328	134.0310877	944.3034194	3569.219387	7747.049898	7001.132251	12147.30943	72	16/12/2013	2013-12	Monthly	0	NA	0	>15 years	35.5	1	1	R1_Dec_2013
1297	569	63.5	482.6629744	51.07675784	52.77100756	8.699467463	73.32598669	65.86498052	96	84	16/12/2013	2013-12	Monthly	0	NA	0	1-15 years	36.7	1	1	R1_Dec_2013
1298	570	1273.597206	875.2568548	3666.78518	4832.144653	191.0175594	3780.872552	2708.10353	6212.899981	182	17/12/2013	2013-12	Monthly	0	NA	0	>15 years	37	1	1	R1_Dec_2013
1299	571	233.6184223	465.7911688	127.4399807	2047.487651	1094.302219	4123.183554	15915.95805	3014.892997	150.5	16/12/2013	2013-12	Monthly	0	NA	0	>15 years	35	1	1	R1_Dec_2013
1300	572	1375.33426	1700.267478	1406.129742	1567.760392	1865.832477	4854.160171	1490.046915	1754.852686	290	16/12/2013	2013-12	Monthly	0	NA	0	>15 years	36.3	1	1	R1_Dec_2013
1301	573	35.16836465	129.0266563	56.05437275	39.93472359	14.9020791	48.73177449	24.64739258	31.68101395	52	16/12/2013	2013-12	Monthly	0	NA	0	1-15 years	36.4	1	1	R1_Dec_2013
1302	574	61.54463814	230.574707	77.74833095	240.1032386	147.6660565	968.0983005	4185.179921	982.1114324	118	16/12/2013	2013-12	Monthly	0	NA	1	>15 years	35.8	1	1	R1_Dec_2013
1303	575	91.6889507	111.0475321	299.553355	135.3884531	137.5055481	909.2635971	1244.693325	1228.672367	53	16/12/2013	2013-12	Monthly	0	NA	0	>15 years	35.3	1	1	R1_Dec_2013
1304	576	51.49653395	194.5578033	68.50971876	79.86944718	48.77044069	122.4237262	145.6436834	94.35432415	95	16/12/2013	2013-12	Monthly	0	NA	0	1-15 years	36.5	1	1	R1_Dec_2013
1305	577	141.9294716	178.2976029	75.43850926	90.09663249	24.38522035	291.2020671	178.1334282	256.8917001	105	16/12/2013	2013-12	Monthly	0	NA	0	1-15 years	35.4	1	1	R1_Dec_2013
1306	578	95.45698977	180.6202898	108.9428413	99.34980015	20.32101695	228.8016241	149.0046915	42.70049706	84	16/12/2013	2013-12	Monthly	0	NA	0	1-15 years	36.5	1	1	R1_Dec_2013
1307	579	1368.103138	5264.155324	613.5108386	3034.066247	4362.587818	16535.99188	19994.78033	51407.36138	214.5	16/12/2013	2013-12	Monthly	0	NA	0	>15 years	36.8	1	1	R1_Dec_2013
1308	580	168.3057451	427.8767791	781.0035022	519.1498772	248.7594267	387.4770362	1178.033332	250.0045231	177.5	16/12/2013	2013-12	Monthly	0	NA	0	>15 years	36	1	1	R1_Dec_2013
1309	581	3359.270701	5253.001032	200.9527769	12993.53732	5012.022126	12431.00696	3052.704856	15236.23379	184	16/12/2013	2013-12	Monthly	0	NA	0	>15 years	36.6	1	1	R1_Dec_2013
1310	582	179.6098623	879.9497446	436.1579875	729.0601849	177.4702147	1179.071227	161.3283878	96.42047723	355.5	16/12/2013	2013-12	Monthly	0	NA	0	1-15 years	36.3	1	1	R1_Dec_2013
1311	583	2562.379776	1672.044992	2147.622207	16572.87076	9283.377433	22433.74191	22853.36431	3379.521684	285	16/12/2013	2013-12	Monthly	0	NA	0	NA	35.5	1	1	R1_Dec_2013
1312	584	56	369.5547585	206.8250932	78.5	22	224.0192392	75	21	109	16/12/2013	2013-12	Monthly	0	NA	0	1-15 years	36	1	1	R1_Dec_2013
1313	585	78.5	562.737646	324.5815114	146	34	227.6324528	77	42	212	16/12/2013	2013-12	Monthly	0	NA	0	1-15 years	36.1	1	1	R1_Dec_2013
1314	565	168	916.9829373	522.7396628	4363.133025	138	5530.023317	26273.76911	836.5	455.5	16/12/2013	2013-12	Monthly	0	NA	0	1-15 years	35.4	1	1	R1_Dec_2013
1315	586	85	511.5683368	330.4616501	245.5	50.5	4870.611847	257	144	187	16/12/2013	2013-12	Monthly	0	NA	0	1-15 years	36.1	1	1	R1_Dec_2013
1316	587	56	342.9141029	79	107	60	453.4582988	402	193	77	16/12/2013	2013-12	Monthly	0	NA	0	1-15 years	35	1	1	R1_Dec_2013
1317	573	95.32398264	401.287971	96.4918222	127.756353	29.0414352	108.0219019	63.28539575	27	92	27/07/2013	2013-07	Monthly	0	NA	0	1-15 years	36	1	1	R1_Jul_2013
1318	572	464.4877699	795.644448	702.4680953	637.7983212	512.5878936	1212.019327	407.3997351	471.5	256.5	27/07/2013	2013-07	Monthly	0	NA	0	>15 years	36.2	1	1	R1_Jul_2013
1319	588	120.7794873	364.5391696	199.0758737	308.2720547	37.02444054	8814.493804	320.1165149	54	159	27/07/2013	2013-07	Monthly	0	NA	0	1-15 years	36.1	1	1	R1_Jul_2013
1320	578	152.3787718	273.0952036	197.2779233	77.69458288	21.33611828	507.7489775	306.2653196	27	107	27/07/2013	2013-07	Monthly	0	NA	0	1-15 years	36.7	1	1	R1_Jul_2013
1321	571	216.279547	362.1474936	102.2706251	1617.505449	838.359035	4349.289561	15727.96804	2992.519094	71	27/07/2013	2013-07	Monthly	0	NA	0	>15 years	36	1	1	R1_Jul_2013
1322	580	321.6104952	274.8875303	392.8093618	2443.727898	197.4129648	15774.86934	1883.762569	8358.964766	101	26/07/2013	2013-07	Monthly	0	NA	0	>15 years	36.8	1	1	R1_Jul_2013
1323	579	379.1914136	1398.593989	144.5513711	1102.642601	1179.250409	2915.645389	4702.550587	22876.6641	140	27/07/2013	2013-07	Monthly	0	NA	0	>15 years	36.8	1	1	R1_Jul_2013
1324	575	171.3383424	156.5547328	568.1827261	258.1465173	214.6162486	1641.295014	2573.244293	2592.080911	66	27/07/2013	2013-07	Monthly	0	NA	0	>15 years	36.1	1	1	R1_Jul_2013
1325	584	120.077281	328.669819	175.7049349	170.426827	38.90703921	290.1422729	170.8314094	25	152	27/07/2013	2013-07	Monthly	0	NA	0	1-15 years	35.3	1	1	R1_Jul_2013
1326	586	105.3309482	301.7755781	191.2849828	335.214531	30.12157875	4352.134093	418.6139041	61.5	161	27/07/2013	2013-07	Monthly	0	NA	0	1-15 years	35.9	1	1	R1_Jul_2013
1327	582	57.58091836	174.4808473	102.2706251	273.1841785	85.34447311	302.9426673	83.10717215	22.5	60	27/07/2013	2013-07	Monthly	0	NA	0	1-15 years	35.6	1	1	R1_Jul_2013
1328	574	116.5662494	540.4915091	239.8382875	802.9022488	204.1110495	2598.480061	10885.12868	2541.995943	220.5	27/07/2013	2013-07	Monthly	0	NA	0	>15 years	36	1	1	R1_Jul_2013
1329	589	912.8682179	2319.593151	272.819395	1616.294543	12535.79296	3906.964821	16562.70513	9889.829425	237	27/07/2013	2013-07	Monthly	0	NA	0	>15 years	35.5	1	1	R1_Jul_2013
1330	585	94.09564707	305.3611099	158.9288964	110.2761822	32.63171031	149.3379346	69.25597679	27	169	27/07/2013	2013-07	Monthly	0	NA	0	1-15 years	36.2	1	1	R1_Jul_2013
1331	577	183.2758499	271.3029025	142.1552838	159.1485811	30.12157875	507.0378445	304.7262979	266	136	27/07/2013	2013-07	Monthly	0	NA	0	1-15 years	36.6	1	1	R1_Jul_2013
1332	583	199.4265953	529.7109679	372.4042475	2468.005	180.7294725	1383.153727	12454.76744	40.5	294	27/07/2013	2013-07	Monthly	0	NA	0	NA	36.5	1	1	R1_Jul_2013
1333	576	53.15554902	203.0571825	93.96233275	86.87034765	81.70317723	111.6748726	94.05769613	41.6755988	103	27/07/2013	2013-07	Monthly	0	NA	0	1-15 years	36.3	1	1	R1_Jul_2013
1334	568	962.7060544	364.0813102	263.8255649	894.2216787	3802.100352	6928.655674	4601.036198	9737.569748	90	27/07/2013	2013-07	Monthly	0	NA	0	>15 years	35.6	1	1	R1_Jul_2013
1335	587	83.867644	195.6629434	97.0204862	131.364916	112.8281971	284.4821108	435.3404376	158.687857	101	27/07/2013	2013-07	Monthly	0	NA	0	1-15 years	36.4	1	1	R1_Jul_2013
1336	569	16.53728192	27.30180605	26.4078635	14.83152277	15.56250995	16.36614512	11.21789036	16.02907646	14	27/07/2013	2013-07	Monthly	0	NA	0	1-15 years	36.5	1	1	R1_Jul_2013
1337	567	3003.779295	739.8914828	493.4337597	2982.98212	3917.433112	11605.31651	6771.424154	28526.34027	232	27/07/2013	2013-07	Monthly	0	NA	0	>15 years	36.1	1	1	R1_Jul_2013
1338	570	51.97431459	81.90541816	99.05947572	367.0717891	27.23439241	185.8038829	321.867162	461.637402	29	27/07/2013	2013-07	Monthly	0	NA	0	>15 years	36.3	1	1	R1_Jul_2013
1339	590	69	515.9405685	30.77436817	354.0749022	8.218995256	630.1784073	12774.20833	581.5	151	16/12/2013	2013-12	Monthly	0	NA	0	1-15 years	36.5	1	1	R1_Dec_2013
1340	591	29	182	73	49.5	15	242.0853069	73	25	65	16/12/2013	2013-12	Monthly	0	NA	0	1-15 years	36.4	1	1	R1_Dec_2013
1341	592	209.7127618	528.5181782	133.8647906	1734.787006	1893.483316	3201.932224	8703.381753	886.5	123	26/07/2013	2013-07	Monthly	0	NA	0	>15 years	36.6	1	1	R1_Jul_2013
1342	590	70.22063214	186.4315902	162.5235527	165.4142732	43.92730234	105.9588202	6460.287498	1062.5	86	26/07/2013	2013-07	Monthly	0	NA	0	1-15 years	35.8	1	1	R1_Jul_2013
1343	591	39.323554	138.0310812	93.32194543	66.41633698	16.94338804	292.9868049	90.80228068	29	62.5	26/07/2013	2013-07	Monthly	0	NA	0	1-15 years	35.2	1	1	R1_Jul_2013
1344	593	124	581.2391482	8.073150597	75.91618632	10.98880101	2935.696206	150.5485269	30	109	16/12/2013	2013-12	Monthly	0	NA	0	1-15 years	36.5	1	1	R1_Dec_2013
1345	594	77.87280744	270.0981853	108.9428413	139.2845237	1564.853028	310.2193449	2962.428185	3124.676399	163	17/12/2013	2013-12	Monthly	0	NA	0	>15 years	35.9	1	1	R1_Dec_2013
1346	595	120.5772502	192.2347161	79.6562139	67.20721775	20.32101695	339.3395516	41.45243298	163.9148113	87	16/12/2013	2013-12	Monthly	0	NA	0	1-15 years	36.7	1	1	R1_Dec_2013
1347	596	789.5594678	303.7480876	228.9296756	89	20	1463.091087	69.38154194	262	125.5	26/07/2013	2013-07	Monthly	0	NA	0	1-15 years	37.1	1	1	R1_Jul_2013
1348	593	203.4738012	543.3401366	270.9327727	115	35	4261.960085	148.4442293	37	200	26/07/2013	2013-07	Monthly	0	NA	0	1-15 years	36.3	1	1	R1_Jul_2013
1349	597	308.5713407	4.228582597	5.798921882	52.7301934	9.911092783	52.45607762	33.80524145	14.96215011	171	26/06/2013	2013-06	Monthly	0	NA	0	1-15 years	36.8	1	1	NA
1350	597	302.9468341	10.12401594	18.61561852	84.88275035	13.56254802	85.12872026	39.89018491	21.29229054	301.5	26/07/2013	2013-07	Monthly	0	NA	0	1-15 years	36.1	1	1	R1_Jul_2013
1351	597	539.0754314	13.64710639	6.460174848	73.95088099	13.04091156	79.73323799	37.1857656	20.71682323	272	24/08/2013	2013-08	Monthly	1	2	0	1-15 years	38	1	1	NA
1352	597	279.4160613	12.85995802	13.14297697	58.51765365	10.43272924	67.14377936	40.56628974	14.3866828	206.5	26/09/2013	2013-09	Monthly	0	NA	0	1-15 years	36.8	1	1	NA
1353	597	360.7007337	12.30181918	10.04171413	66.23426732	11.99763863	75.53675178	46.6512332	17.26401936	206	30/10/2013	2013-10	Monthly	0	NA	0	1-15 years	36.7	1	1	NA
1354	597	423.3576687	14.8616019	7.833382997	78.45223896	14.08418448	91.12370056	49.35565252	21.29229054	277	26/11/2013	2013-11	Monthly	0	NA	0	1-15 years	36	1	1	NA
1355	597	205.4695885	10.91948992	4.362739857	64.3051139	13.56254802	81.53173208	40.56628974	21.29229054	265.5	16/12/2013	2013-12	Monthly	0	NA	0	1-15 years	35.8	1	1	R1_Dec_2013
1356	598	116	337.6198069	55.28417462	88.41458284	94.32054197	9483.494278	4141.291938	5218.797433	248	16/12/2013	2013-12	Monthly	0	NA	0	1-15 years	36.7	1	1	R1_Dec_2013
1357	599	54	291.154902	13.04876453	48.14197181	9.61520088	76.51407307	58.33755418	24	92	16/12/2013	2013-12	Monthly	0	NA	0	1-15 years	36.5	1	1	R1_Dec_2013
1358	600	75	372.7821921	6.333374727	112.4855687	370.6072129	935.1720041	8324.525126	2403.924576	121	16/12/2013	2013-12	Monthly	0	NA	0	>15 years	36.5	1	1	R1_Dec_2013
1359	601	1113.455545	454.7065676	232.8353205	7393.708817	2977.285319	2248.793106	7901.408768	15807.07362	112	16/12/2013	2013-12	Monthly	0	NA	0	>15 years	35.8	1	1	R1_Dec_2013
1360	602	45.21646884	171.8592759	72.77234356	47.72686478	18.96628249	102.2178684	30.24907271	31.68101395	79	16/12/2013	2013-12	Monthly	0	NA	0	1-15 years	37	1	1	R1_Dec_2013
1361	603	108.01712	181.9064335	200.3732394	2923.983937	182.8891526	2989.278362	13625.96283	3947.149944	65	16/12/2013	2013-12	Monthly	0	NA	0	>15 years	35.8	1	1	R1_Dec_2013
1362	599	69.32653283	153.6409222	101.1987404	83.8996945	32.91362656	70.65583521	57.3523899	22	86	26/07/2013	2013-07	Monthly	0	NA	0	1-15 years	36.5	1	1	R1_Jul_2013
1363	602	102.2566359	247.6910137	103.679045	158.2653328	29.0414352	164.4106935	65.26306436	36	101	26/07/2013	2013-07	Monthly	0	NA	0	1-15 years	36.6	1	1	R1_Jul_2013
1364	604	1322.95671	1598.350236	765.4700898	386.9766005	92.8748678	3398.504711	210.8459738	351.5	969.5	27/07/2013	2013-07	Monthly	0	NA	0	1-15 years	36.8	1	0	R1_Jul_2013
1365	605	73.02945743	219.3367102	95.87871106	83.96027505	18.82598672	76.80236635	47.7096729	28	80	26/07/2013	2013-07	Monthly	0	NA	0	1-15 years	36.4	1	1	R1_Jul_2013
1366	606	179.7648183	494.9788098	223.6511239	325.1894235	2960.313916	4764.591246	3226.52023	1113	222	26/07/2013	2013-07	Monthly	0	NA	0	>15 years	36.6	1	1	R1_Jul_2013
1367	607	758.3828272	757.4701265	1530.827506	6387.893649	6461.105928	15095.856	8511.193345	6029.113484	137	27/07/2013	2013-07	Monthly	0	NA	0	>15 years	36.3	1	1	R1_Jul_2013
1368	598	96.90447236	210.3330761	139.7592431	89.599398	136.8021701	9118.147604	2567.088206	3473.482713	151	27/07/2013	2013-07	Monthly	0	NA	0	1-15 years	36.5	1	1	R1_Jul_2013
1369	608	81.7951161	359.6548191	235.629754	178.5	1373.862464	10868.09926	8950.006033	11010.17745	161	26/07/2013	2013-07	Monthly	0	NA	0	>15 years	35.1	1	1	R1_Jul_2013
1370	609	120.3266997	251.7249345	191.7511799	114	27	153.5841472	93.5844054	48	98	26/07/2013	2013-07	Monthly	0	NA	0	1-15 years	36.2	1	1	R1_Jul_2013
1371	610	2428.650093	547.0289198	354.5375573	1577.121263	1200.213847	1678.5	655.7266466	21695.05857	188	26/06/2013	2013-06	Monthly	0	NA	0	>15 years	36.7	1	1	NA
1372	610	2523.955633	574.5343541	436.4064252	1578.027093	1155.477853	1629	716.2180347	21275.50483	238.5	26/07/2013	2013-07	Monthly	0	NA	1	>15 years	36.5	1	1	R1_Jul_2013
1373	610	2851.70892	938.501455	648.0251688	2076.717428	1509.542891	2273.5	816.028825	24552.37482	339	25/09/2013	2013-09	Monthly	0	NA	0	>15 years	36.5	1	1	NA
1374	610	2652.62953	1000.513948	691.2445623	2556.304506	1389.492078	2196	757.3521786	23619.36593	355	29/10/2013	2013-10	Monthly	0	NA	0	>15 years	36.6	1	1	NA
1375	610	3855.230489	1464.916358	1143.668901	3253.348088	1751.621894	2675	1031.98308	26787.30087	591	26/11/2013	2013-11	Monthly	0	NA	0	>15 years	36	1	1	NA
1376	610	2957.728486	1355.206395	1010.921887	2241.941052	1346.818683	2225	738.5998483	23130.98908	503	16/12/2013	2013-12	Monthly	0	NA	0	>15 years	35	1	1	R1_Dec_2013
1377	611	143	480.1514458	10.35386704	130.5388082	8.699467463	425.0781837	79.03797662	121	125	16/12/2013	2013-12	Monthly	0	NA	0	1-15 years	36.1	1	1	R1_Dec_2013
1378	612	80.38483349	106.8171499	79.6562139	265.906818	240.4653673	253.1675114	849.2147081	633.620279	55	17/12/2013	2013-12	Monthly	0	NA	0	>15 years	36.8	1	1	R1_Dec_2013
1379	613	45.21646884	138.5450162	62.93824308	37.01267064	20.32101695	67.74905234	24.64739258	28.23742548	62.5	17/12/2013	2013-12	Monthly	0	NA	0	1-15 years	36	1	1	R1_Dec_2013
1380	614	51.49653395	230.574707	87.03178926	66.2332001	21.67575142	108.1607678	31.36940874	35.81332011	90	16/12/2013	2013-12	Monthly	0	NA	0	1-15 years	36.3	1	1	R1_Dec_2013
1381	615	101.7370549	410.9696363	307.1003859	3450.538903	3078.584953	256.733251	16536.43608	1840.25368	160	16/12/2013	2013-12	Monthly	0	NA	0	>15 years	35.3	1	1	R1_Dec_2013
1382	616	54.00856	250.9147783	74.28364107	121.7522061	28.44942374	114.1036671	40.33209695	44.07793245	118	16/12/2013	2013-12	Monthly	0	NA	0	1-15 years	36.4	1	1	R1_Dec_2013
1383	617	48.98450791	280.5642638	68.83870337	66.72020892	23.70785311	57.05183355	30.24907271	37.1907555	76	16/12/2013	2013-12	Monthly	0	NA	0	1-15 years	36.6	1	1	R1_Dec_2013
1384	618	56.52058605	235.2233412	166.7791903	256.1666416	62.99515256	333.3966523	13164.4726	516.5382709	130.5	16/12/2013	2013-12	Monthly	0	NA	0	>15 years	36	1	1	R1_Dec_2013
1385	619	61	530.6742632	251.0152228	84	80	214.9862054	37	26	143	16/12/2013	2013-12	Monthly	0	NA	0	1-15 years	36.6	1	1	R1_Dec_2013
1386	619	100.5234726	279.1131479	130.3809431	152.5448991	104.5491667	135.8766062	71.19607022	30	135	26/07/2013	2013-07	Monthly	0	NA	0	1-15 years	36.1	1	1	R1_Jul_2013
1387	617	62.39387954	247.6910137	74.13396096	81.99288326	30.97753088	51.63311035	55.37472128	23	72	26/07/2013	2013-07	Monthly	0	NA	0	1-15 years	35.8	1	1	R1_Jul_2013
1388	618	79.72551275	312.9647758	239.664687	535.5894242	104.5491667	433.4463737	14108.29971	389	141	26/07/2013	2013-07	Monthly	0	NA	0	>15 years	35.8	1	1	R1_Jul_2013
1389	614	64.12704286	220.3377567	95.31509266	123.9427305	29.0414352	104.6249868	57.3523899	30	88	26/07/2013	2013-07	Monthly	0	NA	0	1-15 years	35.8	1	1	R1_Jul_2013
1390	613	49.1544425	131.4581726	88.20841417	56.39122951	20.0810525	96.71409095	36.93652095	21.5	74	26/07/2013	2013-07	Monthly	0	NA	0	1-15 years	35.8	1	1	R1_Jul_2013
1391	612	134.8236137	207.3453904	137.3632485	402.6626114	253.5232878	413.8794186	1329.714754	485	105	26/07/2013	2013-07	Monthly	0	NA	0	>15 years	36.6	1	1	R1_Jul_2013
1392	611	164.3162792	390.8514133	214.0600469	174.1862423	23.84624984	435.2134093	78.49010703	49	185	26/07/2013	2013-07	Monthly	0	NA	0	1-15 years	35.5	1	1	R1_Jul_2013
1393	616	75.03518915	338.6845946	223.4467712	95	22	173.7925876	69.38154194	59	151	26/07/2013	2013-07	Monthly	0	NA	0	1-15 years	36.3	1	1	R1_Jul_2013
1394	620	119.1046241	8.892842093	6.811775115	361.6372987	533.7687872	3222.301911	3701.791137	10824.77534	105	26/06/2013	2013-06	Monthly	0	NA	0	>15 years	37	1	1	NA
1395	620	110.9197092	12.09267687	15.31705448	282.8814912	349.5286249	2366.818222	2954.350278	7487.271599	147.5	26/07/2013	2013-07	Monthly	0	NA	1	>15 years	36.5	1	1	R1_Jul_2013
1396	620	107.2506094	10.98555206	5.281632831	324.1826382	375.8023694	2604.81894	3264.634648	7056.778375	168	24/08/2013	2013-08	Monthly	0	NA	0	>15 years	36	1	1	NA
1397	620	61.52798118	15.4091596	12.86797937	228.8761177	197.4820977	1839.859454	2434.554694	4620.610572	100	25/09/2013	2013-09	Monthly	0	NA	0	>15 years	36	1	1	NA
1398	620	89.18734887	63.50723594	8.429537911	410.3908624	368.6049185	2627.599865	3285.180786	5999.251828	190	30/10/2013	2013-10	Monthly	0	NA	0	>15 years	36.3	1	1	NA
1399	620	95.96107156	32.85259966	12.12923291	391.9485716	375.8023694	2422.571539	3241.422695	5442.075373	229	26/11/2013	2013-11	Monthly	0	NA	0	>15 years	35.9	1	1	NA
1400	620	71.68856523	34.31663978	7.805603958	330.1054761	320.0254321	2055.678745	3026.916401	4549.11891	161	16/12/2013	2013-12	Monthly	0	NA	0	>15 years	35.9	1	1	R1_Dec_2013
1401	621	28	152	158.1807739	4665.18015	981.0418337	2018.5	14194.78081	2801.928836	61.5	26/06/2013	2013-06	Monthly	0	NA	0	>15 years	35.5	1	1	NA
1402	621	41	190	247.5285708	6970.420081	1424.583332	2348	16912.27587	4532.532021	103.5	27/07/2013	2013-07	Monthly	0	NA	0	>15 years	36.5	1	1	R1_Jul_2013
1403	621	56	487.7503285	385.3063295	8612.949578	2043.407872	3152.5	20041.50044	5537.831439	142	24/08/2013	2013-08	Monthly	1	2	0	>15 years	36.3	1	1	NA
1404	621	53	354.1324376	268.8473344	5857.534518	1214.283807	2203	16710.81972	3375.282556	120	25/09/2013	2013-09	Monthly	0	NA	0	>15 years	36.4	1	1	NA
1405	621	47	444.5600503	291.8096969	7095.86698	1449.326925	2562	16455.11418	4424.426774	121	30/10/2013	2013-10	Monthly	0	NA	0	>15 years	36	1	1	NA
1406	621	69.5	586.8681984	460.756353	8644.198818	2031.025615	3196	19776.63016	5639.674162	178.5	26/11/2013	2013-11	Monthly	0	NA	0	>15 years	36	1	1	NA
1407	621	60	599.6512801	341.0194913	7874.092973	1683.540494	2769	17853.03666	4889.300366	143.5	16/12/2013	2013-12	Monthly	0	NA	0	>15 years	35.2	1	1	R1_Dec_2013
1408	622	67	252.5035449	10.2720383	38.88390031	629.6113938	2960.669549	3724.236047	2901.746923	54.5	16/12/2013	2013-12	Monthly	0	NA	0	1-15 years	36.8	1	1	R1_Dec_2013
1409	623	24	238.3095586	33.65751673	29.62582881	5.494400503	32.41221151	48.92827124	26	49	16/12/2013	2013-12	Monthly	0	NA	0	1-15 years	37.1	1	1	R1_Dec_2013
1410	624	536.9455674	293.9401426	189.9432522	9265.625305	3538.69836	16606.40721	19120.32371	18878.98251	100	16/12/2013	2013-12	Monthly	0	NA	0	>15 years	36.1	1	1	R1_Dec_2013
1411	625	72.84875535	147.0057806	184.1504927	255.0741175	1608.68986	2819.311441	1743.242857	1456.637924	43	16/12/2013	2013-12	Monthly	0	NA	0	>15 years	35	1	1	R1_Dec_2013
1412	623	39.323554	249.7972341	75.42458603	61.40378325	17.57092094	56.17950872	44.63162949	33	62	27/07/2013	2013-07	Monthly	0	NA	0	1-15 years	36.8	1	1	R1_Jul_2013
1413	626	100	121	85	79.57732606	12.06891586	295	60.49138806	168.3654881	89	26/06/2013	2013-06	Monthly	1	2	0	1-15 years	36.5	1	1	NA
1414	626	181	477.3044926	340.3222432	169.4226942	20.91945416	539.5	98.2985056	256.1235611	199	26/07/2013	2013-07	Monthly	0	NA	0	1-15 years	36.9	1	1	R1_Jul_2013
1415	626	268	644.1705771	478.9634179	229.9731231	28.16080368	760.5	137.3154509	358.8330094	266.5	24/08/2013	2013-08	Monthly	0	NA	0	1-15 years	35.9	1	1	NA
1416	626	157.5	407.5172913	312.715612	138.618568	18.50567099	480	92.2493668	233.3714681	180	25/09/2013	2013-09	Monthly	0	NA	0	1-15 years	35.5	1	1	NA
1417	626	121	170	258.2930028	109.5257821	15.28729343	357	71.9847518	167.7154283	146	29/10/2013	2013-10	Monthly	0	NA	0	1-15 years	36.3	1	1	NA
1418	626	293	1007.806247	859.6163756	439.1109968	38.62053076	909	88.92234045	50.70466437	599	16/12/2013	2013-12	Monthly	0	NA	0	1-15 years	35.6	1	1	R1_Dec_2013
1419	627	77	302.4572073	35.17137983	160.164637	26.32733574	101.4874164	7233.110484	1114	107	16/12/2013	2013-12	Monthly	0	NA	0	>15 years	36.6	1	1	R1_Dec_2013
1420	628	288	332.5965909	7.939464184	99.98717222	8.699467463	164.7177962	73.39240687	45	128	16/12/2013	2013-12	Monthly	0	NA	0	1-15 years	36.3	1	1	R1_Dec_2013
1421	629	57.77659907	185.6080179	67.35501662	69.15525304	17.61154803	210.3786362	32.48974477	39.94562628	90.5	17/12/2013	2013-12	Monthly	0	NA	0	1-15 years	36.6	1	1	R1_Dec_2013
1422	626	90.43293767	177.1472536	67.35501662	80.84346483	18.96628249	295.9563865	118.1954508	130.856362	599	16/12/2013	2013-12	Monthly	0	NA	0	1-15 years	35.6	1	1	R1_Dec_2013
1423	630	71.59274232	301.5017228	105.4756263	155.3558149	35.22309605	218.6986953	54.8964653	622.6007958	134	16/12/2013	2013-12	Monthly	0	NA	0	1-15 years	36.4	1	1	R1_Dec_2013
1424	631	30.77231907	113.691521	55.0709627	35.06463535	16.25681356	48.73177449	25.76772861	29.61486086	48.5	16/12/2013	2013-12	Monthly	0	NA	0	1-15 years	36.5	1	1	R1_Dec_2013
1425	632	27.63228651	112.6339254	49.66220743	27.27249416	13.54734464	33.28023624	21.2863845	24.793837	39	16/12/2013	2013-12	Monthly	0	NA	0	1-15 years	36.2	1	1	R1_Dec_2013
1426	633	51	342.9141029	70	45	123	101.169979	24	24	59	16/12/2013	2013-12	Monthly	0	NA	0	1-15 years	35.3	1	1	R1_Dec_2013
1427	629	119.5882691	372.8439228	133.8647906	189.7277182	98.74087967	188.8684826	79.10674468	47	144	26/07/2013	2013-07	Monthly	0	NA	0	1-15 years	36.5	1	1	R1_Jul_2013
1428	628	596.2081823	320.2204571	154.772925	286.0216858	38.72191359	258.1655517	88.99508777	49	156	26/07/2013	2013-07	Monthly	0	NA	0	1-15 years	36	1	1	R1_Jul_2013
1429	627	57.58091836	240.2402768	118.1969029	338.9739463	197.4129648	487.1261199	7428.925983	392	97	26/07/2013	2013-07	Monthly	0	NA	0	>15 years	36.5	1	1	R1_Jul_2013
1430	631	57.58091836	216.3084476	103.5490079	88.97282878	21.33611828	122.3148797	50.78771631	32	90.5	26/07/2013	2013-07	Monthly	0	NA	0	1-15 years	36.8	1	1	R1_Jul_2013
1431	632	51.96326779	250.3945663	106.1057736	60.15064481	16.31585515	58.31290778	41.55358607	24	61	26/07/2013	2013-07	Monthly	0	NA	0	1-15 years	35.1	1	1	R1_Jul_2013
1432	630	158.6986286	500.966558	295.0104907	397.836074	57.73302593	616.5523298	132.3558668	945	246	26/07/2013	2013-07	Monthly	0	NA	0	1-15 years	36.6	1	1	R1_Jul_2013
1433	633	56.17650572	207.9903136	89.48679699	60.15064481	26.3563814	73.95783426	41.55358607	27	66	26/07/2013	2013-07	Monthly	0	NA	0	1-15 years	36.2	1	1	R1_Jul_2013
1434	634	222.5995354	230.2040874	186.1438029	224.6282437	176.3236714	65.67803435	145.0010629	421.5303892	104	26/06/2013	2013-06	Monthly	0	NA	0	>15 years	36.2	1	1	NA
1435	634	632.0676846	397.9936714	244.8851017	394.2775466	321.3009123	111.6526584	246.2716464	652.9139181	195	26/07/2013	2013-07	Monthly	0	NA	0	>15 years	36.4	1	1	R1_Jul_2013
1436	634	18273.19285	9932.630597	708.1051259	2922.504707	996.4184143	9654.3046	11068.04854	36036.28679	381.5	24/08/2013	2013-08	Monthly	0	NA	NA	>15 years	35.3	1	1	NA
1437	634	7505.716397	6895.727961	577.7607179	12344.19378	1411.52277	4088.264468	6633.396243	29521.08609	291.5	26/09/2013	2013-09	Monthly	0	NA	0	>15 years	36.2	1	1	NA
1438	634	1165.571485	1916.405382	294.1324342	4446.374191	614.4721316	729.4125227	1460.943248	8291.060299	171.5	29/10/2013	2013-10	Monthly	0	NA	0	>15 years	36	1	1	NA
1439	634	804.1510893	1312.261474	315.8464692	2933.675652	575.5934921	414.9306405	780.8192155	3810.264809	244	26/11/2013	2013-11	Monthly	0	NA	0	>15 years	36.5	1	1	NA
1440	634	750.7600568	1218.746939	318.5050152	2616.895273	590.1770194	350.0252889	589.2106681	2458.605514	253	16/12/2013	2013-12	Monthly	0	NA	0	>15 years	36.2	1	1	R1_Dec_2013
1441	634	4684.792004	1322.643448	215.5329091	196.3533599	52.89710142	1997.384927	2005.848036	29557.88821	162	22/08/2013	2013-08	PCD	1	1	1	>15 years	39.9	1	1	NA
1442	635	70	359.5963244	14.78409827	129.1500975	9.157334171	194.473269	60.21941076	441	127.5	16/12/2013	2013-12	Monthly	0	NA	0	1-15 years	36.8	1	1	R1_Dec_2013
1443	636	42.70444279	387.6592295	68.83870337	56.49302361	23.03048588	64.18331274	35.85075285	53.71998017	82.5	17/12/2013	2013-12	Monthly	0	NA	0	1-15 years	36.3	1	1	R1_Dec_2013
1444	637	56.52058605	190.3671979	67.35501662	85.71355307	23.03048588	1433.427318	106.9920905	38.56819089	87	16/12/2013	2013-12	Monthly	0	NA	0	1-15 years	36.2	1	1	R1_Dec_2013
1445	638	47.10048837	986.8020337	78.67280385	6843.102108	591.7717257	907.4807273	2543.741309	1449.062029	83	16/12/2013	2013-12	Monthly	0	NA	0	>15 years	36.3	1	1	R1_Dec_2013
1446	639	65.31267721	275.9124596	106.6313308	136.8494796	46.06097176	2083.580504	1280.544078	2467.911501	131	16/12/2013	2013-12	Monthly	0	NA	0	>15 years	35	1	1	R1_Dec_2013
1447	640	50.24052093	179.7912424	75.23086869	42.85677653	21.67575142	52.29751408	34.73041682	33.05844934	78	16/12/2013	2013-12	Monthly	0	NA	0	1-15 years	35.3	1	1	R1_Dec_2013
1448	641	280.0909042	173.4456692	76.59340581	926.0850399	200.5007006	203.247157	246.4739258	1225.917496	57	16/12/2013	2013-12	Monthly	0	NA	0	>15 years	35.9	1	0	R1_Dec_2013
1449	642	77.24480093	188.2520068	85.83362374	70.12927069	75.86512996	648.3703167	90.74721814	49.58767401	128	16/12/2013	2013-12	Monthly	0	NA	0	1-15 years	36	1	1	R1_Dec_2013
1450	643	118.0652242	363.1950313	195.7372161	254.2186063	587.1330955	2247.604526	326.0177837	7211.739233	54	16/12/2013	2013-12	Monthly	0	NA	0	>15 years	36.1	1	1	R1_Dec_2013
1451	644	48.98450791	435.4578369	85.55667419	62.82413833	21.67575142	66.56047247	35.85075285	50.96510939	97	16/12/2013	2013-12	Monthly	0	NA	0	1-15 years	35.5	1	1	R1_Dec_2013
1452	645	75.36078139	442.4568175	145.946688	141.232559	28.44942374	232.9616536	78.42352185	39.94562628	171.5	16/12/2013	2013-12	Monthly	0	NA	0	1-15 years	36.7	1	1	R1_Dec_2013
1453	646	43	592.7455602	206.8250932	67	18	119.2360467	42	31	92	16/12/2013	2013-12	Monthly	0	NA	0	1-15 years	35.4	1	1	R1_Dec_2013
1454	647	94	549.094806	334.8712103	187	27	1541.035573	118.5	29	203	16/12/2013	2013-12	Monthly	0	NA	1	1-15 years	35.4	1	1	R1_Dec_2013
1455	647	6419.605329	1998.200329	559.3766285	257.5	150	3321.446543	4763.26628	9050.557329	203	16/12/2013	2013-12	Monthly	0	NA	1	1-15 years	35.4	1	1	R1_Dec_2013
1456	648	103	135	79	178.5	154	1716.27643	11398.65564	8318.618912	61	17/12/2013	2013-12	Monthly	0	NA	1	>15 years	36.5	1	1	R1_Dec_2013
1457	645	129.2059631	548.8769033	218.8554654	215.5398106	33.88677609	311.4762635	89.26325897	70	188	26/07/2013	2013-07	Monthly	0	NA	0	1-15 years	36.5	1	1	R1_Jul_2013
1458	639	82.86034593	377.0964057	169.7132051	211.1538261	48.94756546	3022.315342	2243.893648	3308.744522	164	26/07/2013	2013-07	Monthly	0	NA	0	>15 years	36.3	1	1	R1_Jul_2013
1459	635	106.7353609	276.0824289	205.6686317	179.198796	21.33611828	253.1633557	58.48282484	446	219.5	26/07/2013	2013-07	Monthly	1	2	0	1-15 years	36.7	1	1	R1_Jul_2013
1460	643	259.8163389	891.9078317	441.4336073	557.146856	1206.100893	4911.084648	831.0717215	12706.92288	98	26/07/2013	2013-07	Monthly	0	NA	0	>15 years	36.3	1	1	R1_Jul_2013
1461	649	128.4386121	454.8501994	251.4605652	160	479.0124576	340.8490285	3688.419293	3914.577947	159	26/07/2013	2013-07	Monthly	0	NA	0	>15 years	36.5	1	1	R1_Jul_2013
1462	636	50.02345943	422.5333322	88	89	17	86.89629381	58.08687232	36	89	26/07/2013	2013-07	Monthly	0	NA	0	1-15 years	37.1	1	1	R1_Jul_2013
1463	648	403.5676389	659.748187	699.7424731	1547.928433	509.5398048	934.3035622	20285.32768	9732.636078	388	26/07/2013	2013-07	Monthly	0	NA	0	>15 years	35.8	1	1	R1_Jul_2013
1464	650	98.69493347	296.1963396	552.0982019	1827.917541	472.0730967	1054.206975	2607.3339	1192	94	26/07/2013	2013-07	Monthly	0	NA	0	>15 years	36	1	1	R1_Jul_2013
1465	637	113.5667728	400.9807093	270.3244755	233	22	3149.822247	346.9077097	43.5	167	26/07/2013	2013-07	Monthly	0	NA	0	1-15 years	36.3	1	1	R1_Jul_2013
1466	647	151.4223637	514.0569664	375.3659678	253	27	1215.874499	229.1204408	38	249	26/07/2013	2013-07	Monthly	0	NA	0	1-15 years	35.5	1	1	R1_Jul_2013
1467	651	137.2265171	479.9749318	985.4831478	2387.870382	45	4053.139534	7863.069913	10034.18427	217.5	26/07/2013	2013-07	Monthly	0	NA	0	>15 years	36.5	1	1	R1_Jul_2013
1468	493	72.84875535	112.1051276	59.00460289	1316.55085	21.67575142	1527.325127	2200.762581	46.83280323	49	16/12/2013	2013-12	Monthly	0	NA	0	1-15 years	36.1	1	NA	R1_Dec_2013
1469	652	83.27152324	165.3982157	87.48090562	88.53272863	23.53642091	89.03304903	29.95453375	32.29414694	202	20/06/2013	2013-06	Monthly	0	NA	0	1-15 years	36.3	2	1	NA
1470	652	111.6192758	202.952971	131.2478618	115.7735682	28.65303415	111.5074109	40.40378971	46.37108279	284	20/07/2013	2013-07	Monthly	0	NA	0	1-15 years	36.7	2	1	NA
1471	652	77.95631963	169.0602731	90.27067577	88.53272863	22.51309826	92.0584439	30.65115081	35.19233962	225	21/08/2013	2013-08	Monthly	0	NA	0	1-15 years	36.1	2	1	NA
1472	652	119.5920812	278.2038488	122.8571466	137.3392329	29.6763568	137.439367	36.92070439	38.09053229	271.5	17/09/2013	2013-09	Monthly	0	2	0	1-15 years	37.5	2	1	NA
1473	652	77.95631963	157.1599419	61.92993665	80.20913875	22.51309826	82.11786076	34.13423613	30.63803684	167	27/10/2013	2013-10	Monthly	0	NA	0	1-15 years	36.4	2	1	NA
1474	652	104.5323377	276.3659405	136.8427243	116.5302582	28.65303415	117.5582007	94.73992069	48.85524794	347	21/11/2013	2013-11	Monthly	0	NA	0	1-15 years	36.5	2	1	NA
1475	652	73.52698328	180.5066679	64.25120646	86.26265866	23.53642091	94.65163951	50.1564286	34.77831209	180.5	14/12/2013	2013-12	Monthly	0	NA	0	1-15 years	36.1	2	1	NA
1476	653	116.9344794	116.9090426	48.47214588	9730.960413	358.4343359	3107.080532	1209.327223	1284.729225	134	20/06/2013	2013-06	Monthly	0	NA	0	>15 years	36.8	2	1	NA
1477	653	127.5648867	136.1147215	80.04390522	9823.080758	331.2234775	3100.597543	774.3949477	1111.933561	204.5	20/07/2013	2013-07	Monthly	0	NA	0	>15 years	36.5	2	1	NA
1478	653	122.249683	151.6687775	74.46836116	9528.41154	356.0680071	2936.79402	805.1216248	1285.908759	188	21/08/2013	2013-08	Monthly	0	NA	0	>15 years	36.4	2	1	NA
1479	653	139.9670284	187.3763494	89.34069714	10584.83188	406.9517805	3623.126457	1228.150916	1584.361909	184	17/09/2013	2013-09	Monthly	0	NA	0	>15 years	36.7	2	1	NA
1480	653	42.52162889	80.43949107	50.23074454	4954.502231	165.2666077	1425.393183	546.1477781	654.1634894	67.5	27/10/2013	2013-10	Monthly	0	NA	0	>15 years	36.4	2	1	NA
1481	653	171.8582501	260.749102	127.5184083	10283.38482	431.8083792	3808.539942	1486.207821	1610.318123	257	21/11/2013	2013-11	Monthly	1	2	0	>15 years	36	2	1	NA
1482	653	145.282232	257.9941701	120.0610253	9552.791835	339.504607	3032.310058	884.6518821	1343.11707	266	14/12/2013	2013-12	Monthly	0	NA	0	>15 years	36.4	2	1	NA
1483	654	113.9741748	321.1018883	235.2749455	204.2912025	110.6418296	131.799649	7627.217163	36	185	21/06/2013	2013-06	Monthly	0	NA	0	1-15 years	36.5	2	0	NA
1484	654	147.877885	398.2863654	276.8565266	265.643832	100.2396063	152.5554992	9191.689288	41	225.5	22/07/2013	2013-07	Monthly	0	NA	0	1-15 years	36.5	2	0	NA
1485	654	154.3700849	430.6115095	312.0032495	290.4459588	111.5874862	186.8026521	9634.707862	45	269	22/08/2013	2013-08	Monthly	0	NA	1	1-15 years	36.3	2	0	NA
1486	654	75.02097582	273.5678679	161.9575383	96.59775708	37.82626652	74.72106083	57.04633406	27	124	18/09/2013	2013-09	Monthly	1	2	0	1-15 years	36.8	2	0	NA
1487	654	139.9429741	381.2291268	289.726739	255.8535187	87.000413	156.187773	7759.795404	44	267	31/10/2013	2013-10	Monthly	1	0	0	1-15 years	36.1	2	0	NA
1488	654	137.7789075	425.672471	317.9438422	253.2427686	87.000413	151.5177067	7846.217173	52	411	21/11/2013	2013-11	Monthly	0	NA	0	1-15 years	36.8	2	0	NA
1489	654	118.302308	365.9695453	230.3231868	211.4707655	71.86990639	126.6106864	7298.206767	36	173	14/12/2013	2013-12	Monthly	0	NA	0	1-15 years	36	2	0	NA
1490	655	129.8439966	336.354476	325.3696673	595.6444564	385.8279185	611.2597893	3130.897939	3123.763962	163	21/06/2013	2013-06	Monthly	0	NA	1	NA	37	2	1	NA
1491	655	109.6460416	243.5386861	187.2284027	155.9923239	41.60889317	822.9694616	4659.377296	32	197	22/07/2013	2013-07	Monthly	0	NA	0	NA	37	2	1	NA
1492	655	277.0005261	507.4275641	405.0742772	441.9037978	87.94606966	2003.97734	8390.852702	50	486	21/08/2013	2013-08	Monthly	0	NA	0	NA	36.4	2	1	NA
1493	655	278.4432372	535.7503829	390.2229359	449.5930844	93.62000964	2020.58202	8709.606093	43	408	17/09/2013	2013-09	Monthly	0	NA	0	NA	36.6	2	1	NA
1494	655	318.8391472	577.131932	422.4001514	489.1347874	104.0222329	1970.767979	8332.400048	48	470	28/10/2013	2013-10	Monthly	0	NA	0	NA	37.1	2	1	NA
1495	655	194.7659949	392.8996073	303.5875334	293.7093965	67.14162307	1241.199844	5942.412063	42	341	21/11/2013	2013-11	Monthly	0	NA	0	NA	36.4	2	1	NA
1496	655	193.3232838	388.4108242	288.7367033	292.4040214	68.08727974	1200.725936	5655.754073	37	325	16/12/2013	2013-12	Monthly	0	NA	0	NA	36.3	2	1	NA
1497	656	163.0263513	316.6163414	229.8279887	127.9267594	39.71757985	134.9130265	88.57193973	44	247.5	21/06/2013	2013-06	Monthly	0	NA	0	1-15 years	36.3	2	1	NA
1498	656	145.7138184	327.3820469	192.6783496	130.5375096	39.71757985	131.799649	90.07315904	43	180	22/07/2013	2013-07	Monthly	0	NA	0	1-15 years	36.4	2	1	NA
1499	656	274.1151039	494.8435048	357.0537958	225.8298915	60.52202643	269.3071567	136.6109579	66	447	21/08/2013	2013-08	Monthly	0	NA	1	1-15 years	36.5	2	1	NA
1500	656	173.1253288	350.2634668	209.5217052	155.3396364	41.60889317	160.8578393	90.07315904	38	166	17/09/2013	2013-09	Monthly	0	NA	0	1-15 years	36.5	2	1	NA
1501	656	238.0473271	505.1802353	266.4617957	302.8470222	49.17414648	234.5411076	123.099984	57	244.5	28/10/2013	2013-10	Monthly	0	NA	0	1-15 years	36.4	2	1	NA
1502	656	152.9273738	321.1018883	215.9609141	178.8363881	39.71757985	151.5177067	90.07315904	44	213	21/11/2013	2013-11	Monthly	0	NA	0	1-15 years	36.3	2	1	NA
1503	656	119.7450191	300.918836	168.8950303	128.5794469	35.93495319	116.2327613	70.55730792	35	142	14/12/2013	2013-12	Monthly	0	NA	0	1-15 years	36.5	2	1	NA
1504	657	308.7401697	736.5849917	401.6090066	500.6666797	74.70687638	1847.27067	191.405463	39	382	21/06/2013	2013-06	Monthly	0	NA	1	1-15 years	36.4	2	1	NA
1505	657	262.5734154	740.6433133	388.7377782	446.8469323	72.81556305	1831.703783	252.2048453	46	393	22/07/2013	2013-07	Monthly	0	NA	0	1-15 years	36.7	2	1	NA
1506	657	367.8913237	1305.818839	530.7784845	604.9750035	94.5656663	2165.872972	291.2365476	48	565	21/08/2013	2013-08	Monthly	0	NA	0	1-15 years	36.7	2	1	NA
1507	657	383.7611455	982.2496108	432.3002267	577.5308205	75.65253304	2047.564625	282.2292317	33	396	17/09/2013	2013-09	Monthly	1	2	0	1-15 years	37.7	2	1	NA
1508	657	510.71972	1743.046207	564.4146108	728.4145956	103.0765763	3219.751267	316.757276	45	514.5	28/10/2013	2013-10	Monthly	0	NA	0	1-15 years	37	2	1	NA
1509	657	365.0059016	1086.788881	494.6603932	561.611319	73.76121971	2078.698401	229.6865556	49	538.5	21/11/2013	2013-11	Monthly	0	NA	0	1-15 years	36.6	2	1	NA
1510	657	258.9666377	736.5849917	340.7165895	458.3806047	60.52202643	1642.825546	157.6280283	33	315	14/12/2013	2013-12	Monthly	0	NA	0	1-15 years	36.5	2	1	NA
1511	658	269.7869707	435.9997301	2844.660476	5060.975972	509.9598233	17188.00338	21169.57645	12625.42586	160	21/06/2013	2013-06	Monthly	0	NA	0	>15 years	36.3	2	1	NA
1512	658	344.8079465	514.1700058	3133.265037	8670.78327	550.2792442	17814.45781	21745.27153	12526.60607	246	22/07/2013	2013-07	Monthly	0	NA	1	>15 years	36.4	2	1	NA
1513	658	427.7638333	617.1875349	3879.539341	10209.74504	687.2694714	19002.91315	24166.85905	14532.09544	328	21/08/2013	2013-08	Monthly	0	NA	0	>15 years	36.5	2	1	NA
1514	658	317.3964362	469.2333952	2972.865076	8148.106563	565.7835146	17822.54636	22195.17197	12199.42903	162	17/09/2013	2013-09	Monthly	0	NA	0	>15 years	36.2	2	1	NA
1515	658	225.0629275	374.9455124	2210.076992	4982.41618	413.1482525	13982.40854	17894.16596	9122.287936	151	28/10/2013	2013-10	Monthly	0	NA	0	>15 years	36.4	2	1	NA
1516	658	227.9483496	390.2063173	1782.827288	3399.887492	348.001652	12827.41435	16358.74992	7877.566936	340.5	21/11/2013	2013-11	Monthly	0	NA	0	>15 years	36	2	1	NA
1517	658	230.8337717	385.7176357	2065.706974	3914.001005	372.1724164	12924.59799	16662.17228	9284.476305	161	16/12/2013	2013-12	Monthly	0	NA	0	>15 years	36.2	2	1	NA
1518	659	64.9219983	200.125271	93.34954012	66.57412988	34.04363987	85.09898594	33.02682498	38	65	21/06/2013	2013-06	Monthly	0	NA	0	1-15 years	36	2	1	NA
1519	659	138.500263	366.8671081	212.4937154	147.5073858	54.84808645	187.8404446	66.05364997	80	231	22/07/2013	2013-07	Monthly	0	NA	0	1-15 years	36	2	1	NA
1520	659	113.9741748	329.6250699	204.0727346	151.4235111	39.71757985	201.3317472	55.54511474	47	185	24/08/2013	2013-08	Monthly	0	NA	1	1-15 years	35.7	2	1	NA
1521	659	93.77621977	302.2642172	176.3277621	157.9503866	37.82626652	139.0641965	49.54023747	43	152	18/09/2013	2013-09	Monthly	0	NA	0	1-15 years	36.2	2	1	NA
1522	659	118.302308	410.8563539	204.5681103	162.5191994	47.28283315	203.4073323	61.54999201	58.5	163.5	29/10/2013	2013-10	Monthly	0	NA	0	1-15 years	36.2	2	1	NA
1523	659	118.302308	374.0478822	215.4656099	140.9805103	47.28283315	179.5381045	69.80669826	70	220	22/11/2013	2013-11	Monthly	0	NA	0	1-15 years	36.5	2	1	NA
1524	659	117.5809525	392.0018373	272.8965792	151.4235111	51.0654598	193.5483034	72.05852724	70	224	15/12/2013	2013-12	Monthly	0	NA	0	1-15 years	36.2	2	1	NA
1525	660	72.13555367	365.0719901	147.0908621	87.46013141	26.47838656	250.1079953	51.04145679	24	94	21/06/2013	2013-06	Monthly	0	NA	0	1-15 years	35.7	2	1	NA
1526	660	89.44808655	381.2291268	185.7420075	114.8730084	34.04363987	132.8374415	70.55730792	34	198	23/07/2013	2013-07	Monthly	0	NA	0	1-15 years	36.6	2	1	NA
1527	660	93.77621977	443.1843019	178.8052594	143.5912605	37.82626652	160.8578393	84.06828178	33	147	22/08/2013	2013-08	Monthly	0	NA	1	1-15 years	NA	2	1	NA
1528	660	121.1877302	516.8671734	227.3519394	163.171887	37.82626652	177.4625195	115.5938874	43	272	18/09/2013	2013-09	Monthly	0	NA	0	1-15 years	37.1	2	1	NA
1529	660	131.2867077	677.087608	216.4562149	222.5664538	43.5002065	255.8158541	98.32986529	36.5	176	30/10/2013	2013-10	Monthly	0	NA	0	1-15 years	36.3	2	1	NA
1530	660	64.9219983	340.8410225	150.0642459	84.84938122	26.47838656	91.32574101	54.04389543	26	116	21/11/2013	2013-11	Monthly	0	NA	0	1-15 years	36	2	1	NA
1531	660	79.34910904	455.7584395	183.264641	124.0106341	30.26101322	118.3083463	81.8164528	31	175.5	15/12/2013	2013-12	Monthly	0	NA	0	1-15 years	36.5	2	1	NA
1532	661	121.1877302	335.9058334	219.9232246	4464.960907	1676.307324	10666.91639	19356.12852	6008.532121	206	21/06/2013	2013-06	Monthly	0	NA	0	>15 years	36.8	2	1	NA
1533	661	176.010751	500.6858062	328.8350794	6146.055599	2324.766254	12487.07451	23252.99497	8568.358956	358	23/07/2013	2013-07	Monthly	0	NA	0	>15 years	36.8	2	1	NA
1534	661	157.255507	433.3055969	291.7068193	5607.776175	2078.590949	11618.51726	20905.71224	7713.937963	310	22/08/2013	2013-08	Monthly	0	NA	1	>15 years	36.4	2	1	NA
1535	661	178.8961731	473.7256703	338.2412648	5726.805354	2206.328323	11826.38031	22216.88738	7698.280629	386	18/09/2013	2013-09	Monthly	0	NA	0	>15 years	37	2	1	NA
1536	661	193.3232838	491.6978645	353.0932566	5379.158572	2244.998644	11815.59521	21419.11864	8191.920027	358	31/10/2013	2013-10	Monthly	1	0	0	>15 years	36	2	1	NA
1537	661	142.8283963	399.1841811	273.8865605	4405.591008	1716.334133	10699.06402	19396.60699	6101.253969	296	21/11/2013	2013-11	Monthly	0	NA	0	>15 years	36	2	1	NA
1538	661	113.9741748	321.9990259	231.313571	2991.10167	1247.662052	9109.742666	16936.95045	4230.355644	235	15/12/2013	2013-12	Monthly	0	NA	0	>15 years	36.2	2	1	NA
1539	662	257.6300804	821.8795938	350.0278073	123.7758726	54.22939885	840.3039152	160.1164268	54	505	22/06/2013	2013-06	Monthly	0	NA	0	1-15 years	36.6	2	1	NA
1540	662	352.1858014	1142.896591	550.2131422	250.0273775	67.97769715	1136.392738	178.0399074	70	735	23/07/2013	2013-07	Monthly	0	NA	1	1-15 years	36.6	2	1	NA
1541	662	296.0005179	881.5468237	474.2046379	171.6956646	59.5759593	973.3200601	161.3113255	62	671	24/08/2013	2013-08	Monthly	0	NA	0	1-15 years	36.6	2	1	NA
1542	662	396.4945209	1384.528053	668.2515245	356.4991587	91.655322	1319.929438	227.0307544	77	875	19/09/2013	2013-09	Monthly	0	NA	0	1-15 years	36.2	2	1	NA
1543	662	212.86457	670.4026526	403.1051974	39.63349066	48.8828384	720.0777843	135.023554	58	662	21/11/2013	2013-11	Monthly	0	NA	0	1-15 years	36.2	2	1	NA
1544	662	211.9509881	670.9332382	377.3411003	76.44552719	46.59145535	769.9588386	135.023554	59	579	16/12/2013	2013-12	Monthly	0	NA	0	1-15 years	36.4	2	1	NA
1545	663	78.5680387	600.9471336	10.09057705	1701.762235	13.7482983	3911.18626	14857.55899	98	109	21/06/2013	2013-06	Monthly	0	NA	0	1-15 years	36.6	2	1	NA
1546	663	139.7780223	811.7648524	63.49797896	2358.274314	18.3310644	5341.109817	17626.70321	147.5	212	25/07/2013	2013-07	Monthly	0	NA	1	1-15 years	36.3	2	1	NA
1547	663	165.8151049	1150.398308	133.373131	2823.06819	21.3862418	6049.676589	18558.89991	190	309	24/08/2013	2013-08	Monthly	0	NA	0	1-15 years	36.6	2	1	NA
1548	663	154.3953319	760.1614019	145.9037236	2013.870015	20.62244745	4678.587096	16819.47998	136	420.5	20/09/2013	2013-09	Monthly	0	NA	0	1-15 years	36.5	2	1	NA
1549	663	206.0127061	1069.542355	225.3322745	2791.155468	23.67762485	6151.996701	19357.05283	183	390.5	22/11/2013	2013-11	Monthly	0	NA	0	1-15 years	36.6	2	1	NA
1550	663	92.7285573	364.0869094	19.82205311	1350.781418	13.7482983	3110.531388	12992.05297	94	165	14/12/2013	2013-12	Monthly	0	NA	0	1-15 years	36.6	2	1	NA
1551	664	179.0620417	479.2279938	195.0086074	20374.49582	8208.865152	21614.91022	29328.4875	34747.11015	307	22/06/2013	2013-06	Monthly	0	NA	1	>15 years	36.8	2	1	NA
1552	664	336.1981191	373.0588303	164.7045218	19591.68177	8084.959192	21640.44467	29063.64424	33700.78847	287.5	24/07/2013	2013-07	Monthly	0	NA	0	>15 years	36.5	2	1	NA
1553	664	393.2969844	693.2233926	256.7251343	18749.19009	8515.14194	22716.80944	30549.48177	35731.74157	393	23/08/2013	2013-08	Monthly	0	NA	0	>15 years	36	2	1	NA
1554	664	209.2102426	426.3861096	155.3033542	19639.2311	6862.345309	21191.96415	28500.08088	31739.58133	234.5	31/10/2013	2013-10	Monthly	0	NA	0	>15 years	36	2	1	NA
1555	664	155.3089137	261.2465803	185.079385	13674.39665	3781.516554	18430.69219	28453.5559	24685.32136	466	14/12/2013	2013-12	Monthly	0	NA	0	>15 years	36.3	2	1	NA
1556	665	131.0989948	1966.617043	210.1678204	8463.037533	42.00868925	636.9426937	3035.302905	28002.83656	238	22/06/2013	2013-06	Monthly	0	NA	1	1-15 years	36.3	2	1	NA
1557	665	148.9138408	1863.579968	247.3045833	7112.131628	42.7724836	774.4353435	2995.045276	28310.78225	343	24/07/2013	2013-07	Monthly	0	NA	0	1-15 years	36	2	1	NA
1558	665	176.3212961	1756.89443	245.2114489	5848.38343	40.48110055	804.4918762	2573.445581	24409.62615	397	23/08/2013	2013-08	Monthly	0	NA	0	1-15 years	36.4	2	1	NA
1559	665	254.8893348	2424.674461	323.7905887	7975.70585	53.08370733	923.4390058	3933.185097	29515.32407	348	20/09/2013	2013-09	Monthly	0	NA	0	1-15 years	36.4	2	1	NA
1560	665	231.1362069	1186.849933	213.827713	3549.977444	33.6069514	925.3575079	2043.27679	21541.71689	388	30/10/2013	2013-10	Monthly	0	NA	0	1-15 years	36.5	2	1	NA
1561	665	259.4572441	1506.794827	250.4445023	4922.494006	41.2448949	972.0410587	2632.794804	24413.24601	399.5	22/11/2013	2013-11	Monthly	0	NA	0	1-15 years	36.5	2	1	NA
1562	666	480.0872597	319.7706541	242.5951923	133.1255203	32.0793627	11850.72945	1405.20088	8152.973538	165	22/06/2013	2013-06	Monthly	0	NA	1	1-15 years	36.5	2	1	NA
1563	666	419.334067	337.1775959	281.858697	67.6808224	34.37074575	7660.578844	891.3944358	5096.543335	375.5	24/07/2013	2013-07	Monthly	0	NA	0	1-15 years	36.2	2	1	NA
1564	666	335.7413282	278.6415457	229.5165406	41.9707997	38.1897175	5979.331513	695.4310478	4183.495102	328	23/08/2013	2013-08	Monthly	0	NA	0	1-15 years	36.2	2	1	NA
1565	666	235.7041161	300.2582104	173.5848881	174.242656	31.69746553	3709.10404	445.0997686	2790.298977	308	30/10/2013	2013-10	Monthly	0	NA	0	1-15 years	36.3	2	1	NA
1566	666	243.4695618	377.809118	299.6729385	5.741306438	39.7173062	3509.579823	461.2309011	2602.942285	663	22/11/2013	2013-11	Monthly	0	NA	0	1-15 years	36.3	2	1	NA
1567	666	221.0868066	314.4965666	179.3318101	167.9447287	30.551774	3280.638573	421.7992438	2473.700201	363	14/12/2013	2013-12	Monthly	0	NA	0	1-15 years	36.4	2	1	NA
1568	667	152.3691702	100.4536407	26.21616848	59.02181908	39.90958328	104.5922227	32.741002	99.36660598	121	20/06/2013	2013-06	Monthly	0	NA	0	1-15 years	37	2	1	NA
1569	667	135.5376921	112.7946425	60.53731436	65.07533899	34.79297004	111.5074109	38.31393851	72.86884438	198	20/07/2013	2013-07	Monthly	0	NA	0	1-15 years	36.3	2	1	NA
1570	667	132.4371566	133.3705168	44.761247	65.83202898	60.37603625	123.1767911	36.22408732	70.38467924	165	20/08/2013	2013-08	Monthly	0	NA	0	1-15 years	36.7	2	1	NA
1571	667	170.0865155	131.998483	35.4868166	66.58871897	52.18945506	113.236208	31.34776787	44.71497269	127	17/09/2013	2013-09	Monthly	0	NA	0	1-15 years	36	2	1	NA
1572	667	208.1788081	137.7824946	31.7781204	48.42815925	50.14280977	80.38906369	30.65115081	32.29414694	148	27/10/2013	2013-10	Monthly	0	NA	0	1-15 years	37	2	1	NA
1573	667	92.57312956	109.5092081	13.24303996	40.86125937	41.95622858	63.101093	25.42652283	29.80998179	116	21/11/2013	2013-11	Monthly	0	NA	0	1-15 years	35.8	2	1	NA
1574	667	186.0321264	155.3294645	40.58726594	72.64223887	54.23610036	124.4733889	33.43761907	33.12220199	146.5	14/12/2013	2013-12	Monthly	0	NA	0	1-15 years	36.2	2	1	NA
1575	668	193.3232838	473.7256703	247.1574177	1192.867847	69.97859306	207.5585023	9128.681106	330	198	20/06/2013	2013-06	Monthly	0	NA	0	1-15 years	36.4	2	1	NA
1576	668	252.4744378	521.3626944	338.2412648	1343.853418	85.10909967	252.1835803	10242.53362	381	354	20/07/2013	2013-07	Monthly	0	NA	0	1-15 years	36.5	2	1	NA
1577	668	206.3076835	487.6536908	327.8449601	1106.393408	75.65253304	243.8812402	8652.676882	303	339	20/08/2013	2013-08	Monthly	0	NA	1	1-15 years	37	2	1	NA
1578	668	161.5836402	406.3669337	249.632602	964.0331159	62.41333976	185.7648596	8114.827037	266	215	17/09/2013	2013-09	Monthly	0	NA	0	1-15 years	36.3	2	1	NA
1579	668	131.2867077	348.9173467	252.1076663	693.3137448	51.0654598	144.2531591	6065.470396	179	285	27/10/2013	2013-10	Monthly	0	NA	0	1-15 years	36.5	2	1	NA
1580	668	207.7503946	521.3626944	323.3894391	1127.19367	81.32647302	242.3245514	9405.848393	334	350	22/11/2013	2013-11	Monthly	0	NA	0	1-15 years	36.5	2	1	NA
1581	668	168.7971956	452.1655936	256.067513	970.0575209	68.08727974	207.5585023	7972.415737	268	205	15/12/2013	2013-12	Monthly	0	NA	0	1-15 years	36.1	2	1	NA
1582	669	116.8595969	278.0509449	162.9486226	142.2858854	38.77192318	91.32574101	57.04633406	30	129	20/06/2013	2013-06	Monthly	0	NA	0	1-15 years	36.2	2	1	NA
1583	669	173.1253288	365.0719901	237.7506691	227.1352666	102.1309196	152.0366029	117.0951068	42	248	20/07/2013	2013-07	Monthly	0	NA	0	1-15 years	36.1	2	1	NA
1584	669	150.0419516	378.536106	192.6783496	135.7590099	83.21778634	99.62808111	88.57193973	39	174	20/08/2013	2013-08	Monthly	1	2	1	1-15 years	36.1	2	1	NA
1585	669	201.2581947	502.4835413	282.7965549	427.0739446	85.10909967	213.7852574	100.5816943	44	274.5	17/09/2013	2013-09	Monthly	0	NA	0	1-15 years	36.1	2	1	NA
1586	669	106.7606194	301.3672938	209.5217052	146.2020107	49.17414648	104.8170437	81.06584314	39	223.5	27/10/2013	2013-10	Monthly	0	NA	0	1-15 years	37	2	1	NA
1587	669	217.8493721	693.3095367	322.894383	334.1760245	83.21778634	253.2213728	132.1072999	57	348.5	22/11/2013	2013-11	Monthly	0	NA	0	1-15 years	36.1	2	1	NA
1588	669	138.500263	458.9023443	230.3231868	240.1890176	60.52202643	174.8680382	90.07315904	35	204	15/12/2013	2013-12	Monthly	0	NA	0	1-15 years	36	2	1	NA
1589	670	86.5626644	331.8681494	162.9486226	105.7353827	58.63071311	124.5351014	45.03657952	26	119	20/06/2013	2013-06	Monthly	0	NA	0	1-15 years	36.6	2	1	NA
1590	670	108.2033305	341.7383578	217.4468063	127.2740718	68.08727974	141.1397816	66.05364997	39.5	229	21/07/2013	2013-07	Monthly	0	NA	0	1-15 years	37	2	1	NA
1591	670	144.2711073	435.9997301	270.9166282	163.171887	77.54384637	174.3491419	88.57193973	48	349	20/08/2013	2013-08	Monthly	1	2	1	1-15 years	36.2	2	1	NA
1592	670	121.1877302	505.1802353	215.4656099	193.1955142	71.86990639	152.5554992	64.55243065	32	184	17/09/2013	2013-09	Monthly	0	NA	0	1-15 years	36.3	2	1	NA
1593	670	134.1721298	611.3353012	219.427948	161.8665119	85.10909967	195.1049922	76.56218519	42	198	27/10/2013	2013-10	Monthly	0	NA	0	1-15 years	36.8	2	1	NA
1594	670	96.66164192	430.6115095	200.6050263	127.9267594	68.08727974	122.4595164	68.30547894	43	213	21/11/2013	2013-11	Monthly	1	2	0	1-15 years	35.8	2	1	NA
1595	670	121.1877302	422.5295308	183.7601183	121.3998839	79.43515969	110.0060062	177.1438795	33	169	15/12/2013	2013-12	Monthly	0	NA	0	1-15 years	36.2	2	1	NA
1596	671	512.0626243	350.3672459	79.11948271	2983.26244	11203.42952	10750.00671	6089.497662	8360.997583	229	20/06/2013	2013-06	Monthly	0	NA	0	>15 years	36	2	1	NA
1597	671	1119.550291	1217.960129	334.2825849	5297.968054	15956.05542	13113.16035	9136.340658	11920.09347	547	21/07/2013	2013-07	Monthly	0	NA	0	>15 years	36.1	2	1	NA
1598	671	1095.421067	1652.528713	379.968879	5780.392782	18103.27312	14357.89105	10674.15172	13572.85269	564.5	17/09/2013	2013-09	Monthly	0	NA	0	>15 years	36.1	2	1	NA
1599	671	1234.592123	1480.382022	352.6528771	5086.94986	16931.68321	12969.57177	9413.839495	12832.46087	528	27/10/2013	2013-10	Monthly	0	NA	0	>15 years	36.8	2	1	NA
1600	671	1023.593797	1090.949179	334.2825849	4202.298085	15047.15237	12428.14423	7871.726742	10602.84223	579	21/11/2013	2013-11	Monthly	0	NA	0	>15 years	35.8	2	1	NA
1601	671	942.7810473	990.4136223	203.8944267	3995.102395	14236.86399	12072.91696	7762.799826	10231.68884	381.5	15/12/2013	2013-12	Monthly	0	NA	0	>15 years	36.4	2	1	NA
1602	672	50.24700149	19.17226341	13.58912207	279.8516516	77.9070237	177.7811936	4128.793442	60	153	20/06/2013	2013-06	Monthly	0	NA	1	>15 years	37.2	2	1	NA
1603	672	54.81491072	69.45339211	31.25290708	383.4299662	90.89152765	207.1982257	5211.144033	63	170.5	21/07/2013	2013-07	Monthly	0	NA	0	>15 years	36.5	2	1	NA
1604	672	42.93834673	2.420366799	9.556428707	223.7176545	69.88718303	126.6211379	3791.918444	48	138	21/08/2013	2013-08	Monthly	0	NA	0	>15 years	36.7	2	1	NA
1605	672	46.59267411	47.45005135	5.280639156	317.8749161	81.72599545	179.6996957	4469.739122	53	127	20/09/2013	2013-09	Monthly	0	NA	0	>15 years	36.9	2	1	NA
1606	672	25.58029167	81.86016588	40.01477291	181.5902379	37.80782033	63.95006965	2139.466136	30	53.5	28/10/2013	2013-10	Monthly	0	NA	0	>15 years	36.9	2	1	NA
1607	672	35.62969197	29.12045877	50.68537902	202.6732325	66.45010845	101.0411101	3505.322019	48	87	15/12/2013	2013-12	Monthly	0	NA	0	>15 years	36	2	1	NA
1608	673	124.0731523	407.2648056	304.5776094	144.8966356	43.5002065	108.9682137	82.56706246	43	358	26/06/2013	2013-06	Monthly	0	NA	1	1-15 years	36	2	1	NA
1609	673	165.9117734	495.2928943	397.1536188	200.3750772	53.90242979	145.2909516	129.1048613	54	502	21/07/2013	2013-07	Monthly	0	NA	0	1-15 years	36.8	2	1	NA
1610	673	157.9768625	517.7662535	353.0932566	198.4170145	49.17414648	158.7822543	115.5938874	47	403	22/08/2013	2013-08	Monthly	0	NA	0	1-15 years	36.7	2	1	NA
1611	673	160.1409291	577.131932	353.0932566	193.8482017	54.84808645	149.4421217	112.5914488	41	403	17/09/2013	2013-09	Monthly	0	NA	0	1-15 years	36.3	2	1	NA
1612	673	245.2608825	437.7958439	469.9167769	538.5532126	66.19596641	924.6731278	109.5890102	55	344	29/10/2013	2013-10	Monthly	0	NA	0	1-15 years	36.3	2	1	NA
1613	673	183.2243063	618.5381186	413.4898085	230.3987044	69.97859306	203.4073323	127.603642	63	516	21/11/2013	2013-11	Monthly	0	NA	0	1-15 years	36.3	2	1	NA
1614	673	176.010751	512.8214629	288.7367033	180.1417632	54.84808645	155.6688767	93.07559768	40	310	14/12/2013	2013-12	Monthly	0	NA	0	1-15 years	36.1	2	1	NA
1615	674	25.69015079	226.7911948	21.58216834	34.05104947	13.30319443	35.44033991	50.85304566	25.66970654	119.5	23/06/2013	2013-06	Monthly	0	NA	0	1-15 years	36.3	2	1	NA
1616	674	347.2599692	403.4176532	344.5914498	75.66899883	21.48977561	92.49064317	57.8192163	38.09053229	284	31/07/2013	2013-07	Monthly	0	NA	0	1-15 years	36.5	2	1	NA
1617	674	31.0053544	152.1182455	21.58216834	34.05104947	13.30319443	31.98274577	24.38159724	28.98192674	95	28/08/2013	2013-08	Monthly	0	NA	0	1-15 years	36.5	2	1	NA
1618	674	57.58137245	142.5185892	45.68890969	40.86125937	15.34983972	39.76233258	43.88687502	26.49776159	153	22/09/2013	2013-09	Monthly	0	NA	0	1-15 years	36	2	1	NA
1619	674	26.57601805	111.5002847	46.59083552	25.7274596	12.27987178	25.06755749	16.370501	17.38915605	74	21/10/2013	2013-10	Monthly	1	2	0	1-15 years	36.6	2	1	NA
1620	674	49.60856703	514.6518206	14.63271679	36.32111944	14.32651708	46.67752085	22.98836311	22.35748635	130	18/11/2013	2013-11	Monthly	0	NA	0	1-15 years	36	2	1	NA
1621	674	46.95096523	414.4825103	21.58216834	37.83449941	15.34983972	46.67752085	22.29174604	37.26247724	140	10/12/2013	2013-12	Monthly	0	NA	0	1-15 years	36	2	1	NA
1622	675	217.923348	246.0594331	227.4214909	8385.614306	3243.204011	2005.4046	3167.629513	6693.932984	419	24/06/2013	2013-06	Monthly	0	NA	0	>15 years	36.5	2	1	NA
1623	675	304.2954067	357.3420772	313.1327502	10710.34405	5039.510419	2798.058056	4874.248668	9945.612094	527	31/07/2013	2013-07	Monthly	0	NA	0	>15 years	36	2	1	NA
1624	675	190.4614627	191.0407611	187.2362204	8135.590395	2886.206702	1919.829145	2564.882066	5984.195388	374	28/08/2013	2013-08	Monthly	0	NA	0	>15 years	36.1	2	1	NA
1625	675	205.5212063	276.3659405	208.7238764	8489.955295	3309.860381	2085.793663	3131.746624	6907.604533	361.5	22/09/2013	2013-09	Monthly	1	0	0	>15 years	36	2	1	NA
1626	675	165.6571792	201.1200326	173.2304875	7078.064001	2620.951295	1626.365842	2056.056864	5469.42134	341	21/10/2013	2013-10	Monthly	0	NA	0	>15 years	36.6	2	1	NA
1627	675	266.6460478	331.5589057	272.3480772	8894.348066	3749.187587	2269.910551	3713.490238	8097.675905	481	18/11/2013	2013-11	Monthly	0	NA	0	>15 years	36	2	1	NA
1628	675	271.0753842	364.7111878	292.0284726	8968.652566	3708.700546	2282.44433	3798.911663	8134.744806	486	10/12/2013	2013-12	Monthly	0	NA	0	>15 years	36.1	2	1	NA
1629	676	278.6424628	1874.419524	3088.693631	20340.09464	75.61564065	3922.697273	9228.901264	25378.96343	185	24/06/2013	2013-06	Monthly	0	NA	1	>15 years	36	2	1	NA
1630	676	148.0002589	3086.742685	7222.163387	19740.78088	37.42592315	750.7738177	8957.416185	13992.18421	209.5	26/08/2013	2013-08	Monthly	0	NA	0	>15 years	36	2	1	NA
1631	676	120.1360127	2384.742072	6245.935606	18342.19701	32.0793627	541.0175893	7213.774789	10079.83649	201	24/09/2013	2013-09	Monthly	0	NA	0	>15 years	36	2	1	NA
1632	676	140.6916042	2413.730682	7017.810465	18758.09863	33.6069514	541.0175893	7761.032653	9819.325876	258	24/10/2013	2013-10	Monthly	1	0	0	>15 years	36.2	2	1	NA
1633	676	259.4572441	5511.929865	9857.776287	22248.98516	255.3408408	1810.426472	12187.13545	21163.34449	261	19/11/2013	2013-11	Monthly	0	NA	0	>15 years	36	2	1	NA
1634	676	105.0619122	2848.412867	6242.412234	19545.20478	74.8518463	612.0021666	7744.537825	12577.47246	148	11/12/2013	2013-12	Monthly	0	NA	1	>15 years	36	2	1	NA
1635	677	86.7902753	307.6407585	172.0176566	111.2633828	22.9138305	208.4772271	65.71942891	53	470	25/06/2013	2013-06	Monthly	0	NA	0	1-15 years	36.9	2	1	NA
1636	677	74.91371132	158.6315308	155.8256002	85.72178861	20.62244745	164.9911797	68.10922633	52	442	27/08/2013	2013-08	Monthly	0	NA	1	1-15 years	36.9	2	1	NA
1637	677	113.2841488	210.1525699	154.7811129	97.96775841	22.15003615	189.9317069	63.3296315	49	399	25/09/2013	2013-09	Monthly	0	NA	0	1-15 years	36.4	2	1	NA
1638	677	57.55565625	109.2952575	54.13136654	61.22984901	18.3310644	125.3421365	52.57554313	39	237	24/10/2013	2013-10	Monthly	0	NA	0	1-15 years	36.1	2	1	NA
1639	677	107.8026577	286.0222436	154.2588764	110.5636131	26.73280225	230.2202508	69.30412504	53	388	19/11/2013	2013-11	Monthly	0	NA	0	1-15 years	36.9	2	1	NA
1640	677	100.494003	321.8803848	180.3767746	111.9631525	25.9690079	236.6152577	70.49902374	54	437	11/12/2013	2013-12	Monthly	0	NA	0	1-15 years	36.4	2	1	NA
1641	678	215.6053155	361.9760281	287.6210673	130.7880881	933.759198	1459.98009	1582.643338	10489.01242	254	23/06/2013	2013-06	Monthly	0	NA	NA	>15 years	36.2	2	1	NA
1642	678	515.2601608	1094.160952	921.4593196	638.4316697	1585.355293	2433.939651	2346.814359	14423.03067	855	31/07/2013	2013-07	Monthly	0	NA	0	>15 years	36.1	2	1	NA
1643	678	216.5188973	346.146312	384.1738885	80.53572457	550.967059	1090.988188	1290.490604	7656.160549	465	28/08/2013	2013-08	Monthly	0	NA	1	>15 years	36.4	2	1	NA
1644	678	435.3217493	913.5416473	842.5571619	495.361197	1103.968448	1844.320009	1859.262389	10099.5485	911	22/09/2013	2013-09	Monthly	0	NA	0	>15 years	36.2	2	1	NA
1645	678	394.6673572	924.2112211	743.084416	445.5271189	1014.429155	1566.776706	1629.841837	9367.709354	712	18/11/2013	2013-11	Monthly	0	NA	0	>15 years	36	2	1	NA
1646	678	407.457503	931.6812928	790.9274628	468.9758696	986.0643987	1577.008718	1682.41738	9290.702311	785	10/12/2013	2013-12	Monthly	0	NA	1	>15 years	36	2	1	NA
1647	679	93.90193046	221.2883757	121.9250403	132.7990929	32.74632475	513.4527294	877.7375005	46.37108279	258	23/06/2013	2013-06	Monthly	0	NA	NA	1-15 years	36.5	2	1	NA
1648	679	128.0078203	269.9343203	216.2014636	173.2820073	40.93290593	580.8758151	1041.442511	68.72856914	421	31/07/2013	2013-07	Monthly	0	NA	0	1-15 years	36.6	2	1	NA
1649	679	93.01606319	186.4603101	158.29759	132.4207479	30.69967945	417.9366913	744.6836413	57.13579844	343	28/08/2013	2013-08	Monthly	0	NA	0	1-15 years	36	2	1	NA
1650	679	146.1680993	330.6383257	273.28488	198.2527769	45.02619653	613.7229594	1054.329926	83.63356003	543	23/09/2013	2013-09	Monthly	0	NA	0	1-15 years	36	2	1	NA
1651	679	83.27152324	194.2474588	160.1638436	105.9365984	27.6297115	374.2845654	635.3147623	52.16746814	424	21/10/2013	2013-10	Monthly	1	2	0	1-15 years	36	2	1	NA
1652	679	149.7115684	445.8475001	219.9409812	95.50088895	44.00287388	709.2389974	1069.307193	94.39827568	396	18/11/2013	2013-11	Monthly	0	NA	0	1-15 years	36	2	1	NA
1653	679	79.72805416	200.6618148	101.4348467	112.7468082	28.65303415	407.5639089	612.3263992	51.33941309	236	10/12/2013	2013-12	Monthly	0	NA	0	1-15 years	36	2	1	NA
1654	680	111.0001942	822.9444288	105.1878083	99.23388373	30.16987683	213.5932326	152.9470346	58	194.5	25/06/2013	2013-06	Monthly	0	NA	1	1-15 years	36.3	2	0	NA
1655	680	128.8150402	1123.611253	219.0566702	261.7222776	37.04402598	235.3362563	246.1491338	48	524	31/08/2013	2013-08	Monthly	0	NA	0	1-15 years	36.5	2	0	NA
1656	680	240.7288162	1319.455856	393.1118666	544.6140458	54.9931932	485.3810287	350.1053213	60	528.5	23/09/2013	2013-09	Monthly	1	2	0	1-15 years	38	2	0	NA
1657	680	140.6916042	764.4149816	190.8276316	179.8779581	38.57161468	269.2297932	193.5735906	37.5	340	24/10/2013	2013-10	Monthly	0	NA	0	1-15 years	36.7	2	0	NA
1658	680	205.5559152	921.0101069	404.6834669	327.2367925	40.48110055	328.703358	248.5389312	40	587	19/11/2013	2013-11	Monthly	0	NA	0	1-15 years	36.5	2	0	NA
1659	680	105.0619122	220.6794444	69.74495235	133.1255203	38.1897175	190.5712076	78.8633147	31	201	16/12/2013	2013-12	Monthly	0	NA	0	1-15 years	36	2	0	NA
1660	681	64.45196757	521.5166176	211.8667287	200.4616787	42.37119455	142.1099998	55.92306045	33	111	25/06/2013	2013-06	Monthly	1	0	0	1-15 years	36.5	2	0	NA
1661	681	63.23589271	442.7353945	195.060645	133.6411191	31.38607003	147.9647189	50.83914586	27	106	30/08/2013	2013-08	Monthly	0	NA	0	1-15 years	36	2	0	NA
1662	681	336.8527362	413.0900438	283.9869443	190.1204016	69.04935408	7084.210104	643.4783319	63	93	24/10/2013	2013-10	Monthly	0	NA	0	1-15 years	36.7	2	0	NA
1663	681	290.6418915	385.5173227	255.5127688	189.3249188	56.49492606	6710.572577	361.6842091	33	83	20/11/2013	2013-11	Monthly	0	NA	0	1-15 years	36.4	2	0	NA
1664	681	250.5114211	427.2889138	275.6188648	205.2345758	59.63353307	6974.034936	363.1367561	34.5	128.5	11/12/2013	2013-12	Monthly	0	NA	0	1-15 years	36.2	2	0	NA
1665	681	20.67327262	46.1396917	54.97214426	28.63738267	12.55442801	25.54786514	24.69329942	14	21	21/09/2013	2013-09	PCD	1	1	1	1-15 years	39.9	2	0	NA
1666	682	64.86431102	208.0477286	46.32919194	70.32685515	34.37074575	397.7694332	96.78679531	109	206	26/06/2013	2013-06	Monthly	1	0	1	1-15 years	36	2	0	NA
1667	682	77.65445685	338.7602352	72.86924197	90.27029168	48.8828384	558.2841081	93.20209919	144	229.5	01/08/2013	2013-08	Monthly	0	NA	0	1-15 years	36.1	2	0	NA
1668	682	117.852058	406.3175289	153.7366446	107.7645343	71.03287455	638.2216951	108.7357824	801.5	421	30/08/2013	2013-08	Monthly	0	NA	0	1-15 years	36.3	2	0	NA
1669	682	107.8026577	331.3748584	90.58426804	90.97006138	58.81216495	548.6915976	84.83780824	440	269	27/09/2013	2013-09	Monthly	0	NA	0	1-15 years	36.8	2	0	NA
1670	682	43.85192857	90.9424243	58.6883336	40.58664277	25.9690079	263.474287	46.60104959	103.5	89	25/10/2013	2013-10	Monthly	0	NA	0	1-15 years	36.5	2	0	NA
1671	682	64.86431102	214.8891089	26.0564278	66.12823693	35.89833445	399.0484346	63.3296315	133.5	150	20/11/2013	2013-11	Monthly	0	NA	0	1-15 years	36.1	2	0	NA
1672	682	70.34580209	261.7736521	44.76910422	68.22754604	42.00868925	437.4184764	66.91432762	132	164	13/12/2013	2013-12	Monthly	0	NA	0	1-15 years	36	2	0	NA
1673	683	63.49393825	240.6932133	7.751788826	132.6063587	19.09485875	103.5991128	50.18574572	25	119.5	20/11/2013	2013-11	Monthly	0	NA	0	1-15 years	36.1	2	0	NA
1674	683	74.91371132	239.1125542	115.6255023	77.67443703	21.3862418	134.2951463	58.55003667	42	352	02/08/2013	2013-08	Monthly	0	NA	0	1-15 years	35.5	2	0	NA
1675	683	92.27176638	358.8098184	52.05049845	176.69185	27.4965966	153.4801672	60.93983408	44	188.5	13/12/2013	2013-12	Monthly	0	NA	0	1-15 years	36.7	2	0	NA
1676	683	104.1483304	402.0933239	261.9598175	1550.00622	28.26039095	184.1762006	80.05821341	58	646	30/08/2013	2013-08	Monthly	0	NA	0	1-15 years	36.3	2	0	NA
1677	683	10.0494003	8.722804561	25.34268951	6.997697029	3.81897175	15.34801672	10.75408837	8	10	27/09/2013	2013-09	Monthly	0	NA	1	1-15 years	36.3	2	0	NA
1678	683	47.50625596	53.73579203	8.047286571	96.21833415	15.275887	78.01908498	64.52453021	29	121	25/10/2013	2013-10	Monthly	0	NA	0	1-15 years	36.5	2	0	NA
1679	684	10.0494003	8.722804561	24.00886375	6.997697029	4.5827661	17.9060195	11.94898708	11	10	23/06/2013	2013-06	Monthly	0	NA	1	1-15 years	36.6	2	0	NA
1680	684	10.0494003	8.722804561	24.00886375	6.997697029	4.5827661	16.62701811	10.75408837	10	9	31/07/2013	2013-07	Monthly	0	NA	0	1-15 years	36.8	2	0	NA
1681	684	10.0494003	8.051819595	23.34195087	6.997697029	4.5827661	17.9060195	10.75408837	10	10	28/08/2013	2013-08	Monthly	0	NA	0	1-15 years	36.6	2	0	NA
1682	684	9.135818453	8.051819595	24.00886375	6.997697029	4.5827661	15.34801672	10.75408837	9	9.5	22/09/2013	2013-09	Monthly	0	NA	0	1-15 years	36.7	2	0	NA
1683	684	10.0494003	8.051819595	23.34195087	6.997697029	4.5827661	15.34801672	10.75408837	9	9	18/11/2013	2013-11	Monthly	1	2	0	1-15 years	36.6	2	0	NA
1684	684	10.0494003	8.722804561	24.00886375	6.997697029	4.5827661	15.34801672	10.75408837	9	9	10/12/2013	2013-12	Monthly	0	NA	0	1-15 years	36	2	0	NA
1685	685	31.89122166	234.5886528	63.33441703	99.50473346	16.37316237	62.23669447	20.20189485	22.35748635	97	28/06/2013	2013-06	Monthly	0	NA	0	1-15 years	36.8	3	1	NA
1686	685	42.52162889	221.2883757	58.68064541	100.6397684	19.44313032	67.85528494	35.17916173	28.15387169	224.5	22/07/2013	2013-07	Monthly	0	NA	0	1-15 years	36.3	3	1	NA
1687	685	38.97815981	282.7992148	28.07001003	88.53272863	17.39648502	76.06707102	22.98836311	21.5294313	134.5	24/08/2013	2013-08	Monthly	0	NA	0	1-15 years	36	3	1	NA
1688	685	46.95096523	500.7897362	63.32266341	101.3964584	19.44313032	107.6176175	29.25791668	27.32581664	208	22/09/2013	2013-09	Monthly	1	2	0	1-15 years	36.5	3	1	NA
1689	685	43.40749615	323.2742933	35.95044578	127.880608	18.41980767	86.43985343	23.68498017	23.1855414	147	27/10/2013	2013-10	Monthly	0	NA	0	1-15 years	36.7	3	1	NA
1690	685	41.63576162	230.0016552	60.53731436	108.9633583	17.39648502	72.60947688	23.68498017	26.49776159	193.5	24/11/2013	2013-11	Monthly	0	NA	0	1-15 years	36.4	3	1	NA
1691	685	1113.265452	1534.046741	962.1598253	1013.035993	843.9336074	22557.31831	2428.015928	659.9598747	335	21/12/2013	2013-12	Monthly	0	NA	0	1-15 years	36.5	3	1	NA
1692	686	133.7659575	144.3484549	70.28790011	886.8861831	647.3341738	4640.091332	4022.995497	4314.198655	175	22/07/2013	2013-07	Monthly	0	NA	0	>15 years	36.3	3	1	NA
1693	686	202.8636045	329.7177627	124.7215534	1431.370579	1201.174432	6394.820357	6691.573639	6504.789919	213	24/08/2013	2013-08	Monthly	1	2	0	>15 years	36.6	3	1	NA
1694	686	122.249683	145.2634196	67.96585362	865.1453077	704.1794177	4730.853178	4143.372081	4166.869858	181	22/09/2013	2013-09	Monthly	0	NA	0	>15 years	36.7	3	1	NA
1695	687	1175.841381	504.4858469	70.75234612	647.869791	6350.982661	8542.771615	13718.52641	24895.22214	232.5	28/06/2013	2013-06	Monthly	0	NA	0	>15 years	35.5	3	1	NA
1696	687	1320.846701	571.5349626	171.3635121	703.2532391	6470.774786	8537.127237	14542.21901	25531.31144	444	22/07/2013	2013-07	Monthly	0	NA	0	>15 years	35.2	3	1	NA
1697	687	1539.793122	693.9049408	159.2307042	982.5775533	8701.057159	11483.98665	17319.04492	29975.44777	335.5	24/08/2013	2013-08	Monthly	0	NA	0	>15 years	35.7	3	1	NA
1698	687	974.4539953	410.3328784	135.4439311	510.0121051	5359.309689	7540.148415	11773.39024	21837.69402	387.5	22/09/2013	2013-09	Monthly	0	NA	0	>15 years	36.3	3	1	NA
1699	687	8977.885971	5297.569793	3004.665945	11664.57005	28377.03277	20392.7186	18231.33436	35387.7308	716	27/10/2013	2013-10	Monthly	0	NA	0	>15 years	35.3	3	1	NA
1700	687	7539.953422	4421.930328	1489.836126	5733.355315	23277.85368	20085.53371	18678.95324	34677.99565	634	24/11/2013	2013-11	Monthly	0	NA	0	>15 years	35.8	3	1	NA
1701	687	4878.351403	2115.991882	499.2536401	2028.516825	14570.39032	17127.58012	13664.18365	29328.48344	373	21/12/2013	2013-12	Monthly	0	NA	0	>15 years	36.9	3	1	NA
1702	686	117.3774131	158.0752143	54.03976186	897.7575937	698.2579748	4788.76788	3886.808628	4122.917977	149.5	27/10/2013	2013-10	Monthly	1	0	0	>15 years	36.2	3	1	NA
1703	686	88.58672685	369.7781024	148.967815	802.1110696	518.2489663	11451.0802	12960.25252	481.928039	349	24/11/2013	2013-11	Monthly	0	NA	0	>15 years	36	3	1	NA
1704	686	107.1899395	121.4810437	30.3875114	906.4551944	633.7151425	4930.52924	3683.600742	3969.713612	114.5	21/12/2013	2013-12	Monthly	0	NA	0	>15 years	36.6	3	1	NA
1705	688	69.09764694	152.1182455	65.17979671	72.64223887	21.48977561	114.1006065	27.86468256	25.66970654	177	28/06/2013	2013-06	Monthly	0	NA	0	1-15 years	36.6	3	1	NA
1706	688	72.64111601	130.1691753	110.7448209	81.72251873	23.53642091	116.2616029	35.52747026	34.77831209	274.5	22/07/2013	2013-07	Monthly	0	NA	0	1-15 years	36	3	1	NA
1707	688	107.1899395	191.9569281	152.699429	120.3137081	32.74632475	180.6592937	39.01055558	34.77831209	293	24/08/2013	2013-08	Monthly	0	NA	0	1-15 years	36.2	3	1	NA
1708	688	62.89657606	102.2817345	78.18518444	66.58871897	23.53642091	92.0584439	29.25791668	28.98192674	225	22/09/2013	2013-09	Monthly	0	NA	0	1-15 years	36.7	3	1	NA
1709	688	4578.519587	142.5185892	82.8323796	91.18114358	108.4722007	3875.963028	214.5580557	11693.87641	265	27/10/2013	2013-10	Monthly	0	NA	0	1-15 years	36.4	3	1	NA
1710	688	1455.017783	221.2883757	126.5861011	105.1799084	58.32939095	2994.276523	371.9935121	3988.119136	303	24/11/2013	2013-11	Monthly	0	NA	0	1-15 years	36.7	3	1	NA
1711	688	557.2105119	245.1415952	97.7125337	90.0461086	37.86293799	2052.946519	248.6922918	895.9555639	264	21/12/2013	2013-12	Monthly	0	NA	0	1-15 years	36.4	3	1	NA
1712	689	40.13047038	213.9203888	122.1603206	63.63862815	21.97024902	46.83775276	46.48150479	20	67	28/06/2013	2013-06	Monthly	0	NA	0	1-15 years	36.5	3	1	NA
1713	689	69.31626701	396.3806628	228.66422	97.04890793	29.81676653	75.57910104	74.07989825	32	150	22/07/2013	2013-07	Monthly	0	NA	0	1-15 years	36	3	1	NA
1714	689	81.47701561	459.0098609	210.1864438	93.86697652	29.81676653	78.77258418	79.89008635	26	98	24/08/2013	2013-08	Monthly	0	NA	0	1-15 years	35.8	3	1	NA
1715	689	119.1753363	431.4642145	234.5406028	116.1404964	32.95537354	88.35303361	81.34263338	34	155	22/09/2013	2013-09	Monthly	0	NA	0	1-15 years	36.3	3	1	NA
1716	689	4612.33002	3636.362676	1074.432944	1111.429552	496.9363266	20798.09631	10454.68733	9435.840766	682	27/10/2013	2013-10	Monthly	0	NA	0	1-15 years	35.6	3	1	NA
1717	689	2405.69469	2744.851607	5977.085272	3240.954293	527.4609926	9750.768528	9872.491395	693	332.5	24/11/2013	2013-11	Monthly	0	NA	0	1-15 years	35.7	3	1	NA
1718	689	1307.280474	1515.047619	3621.65649	2671.892309	435.8670417	4945.640893	5696.331109	336	232	21/12/2013	2013-12	Monthly	0	NA	0	1-15 years	35.7	3	1	NA
1719	689	2376.173786	3732.454069	516.2568869	316.6021751	112.9898521	11765.50135	4060.000451	590	260	23/10/2013	2013-10	PCD	1	1	1	1-15 years	39.7	3	1	NA
1720	690	54.7233687	220.9112512	203.4645214	146.3688448	42.37119455	526.9247185	1130.081585	23	95	28/06/2013	2013-06	Monthly	0	NA	0	1-15 years	36.5	3	1	NA
1721	690	97.28598879	390.5313621	276.4559412	227.5080956	67.48005057	882.4658417	1901.384055	47	224.5	22/07/2013	2013-07	Monthly	0	NA	0	1-15 years	36.5	3	1	NA
1722	690	80.26094075	375.4884064	243.7714483	213.1894043	67.48005057	902.6912349	2033.565834	33	153.5	24/08/2013	2013-08	Monthly	0	NA	1	1-15 years	35.8	3	1	NA
1723	690	97.28598879	419.7723871	335.8430265	213.1894043	61.20283657	762.1779767	1764.844635	43	472	22/09/2013	2013-09	Monthly	0	NA	0	1-15 years	36.2	3	1	NA
1724	690	66.88411729	361.2793109	233.7012189	146.3688448	51.78701556	629.1161791	1406.791793	31	154	27/10/2013	2013-10	Monthly	0	NA	0	1-15 years	35.8	3	1	NA
1725	690	98.50206365	430.629187	284.4051877	197.2797473	64.34144357	729.1786508	1612.327197	43	287	24/11/2013	2013-11	Monthly	1	0	0	1-15 years	39.2	3	1	NA
1726	690	76.61271617	370.4735967	238.7369962	168.6423646	52.57166731	566.3110106	1242.65398	45	181	21/12/2013	2013-12	Monthly	0	NA	0	1-15 years	NA	3	1	NA
1727	691	54.7233687	369.6377757	239.5761664	1742.64185	474.4400202	273.5750559	14631.23019	916	107	28/06/2013	2013-06	Monthly	1	0	0	>15 years	35.8	3	1	NA
1728	691	79.04486589	420.6076166	305.7319208	2081.117576	538.7050446	362.9925839	16655.56684	1137.5	234	22/07/2013	2013-07	Monthly	0	NA	0	>15 years	36	3	1	NA
1729	691	94.85383907	504.0308636	342.1161549	2689.983019	759.0753994	636.0353925	18272.77409	3066.240408	200	24/08/2013	2013-08	Monthly	0	NA	0	>15 years	35.9	3	1	NA
1730	691	130.7280474	586.8281826	457.8778119	2851.633501	758.0063297	620.600224	19476.14318	3079.716183	517.5	22/09/2013	2013-09	Monthly	0	NA	1	>15 years	35.4	3	1	NA
1731	691	68.70822958	410.5839429	271.4326244	1827.212656	497.4719085	331.0577524	14875.63196	1007	167	27/10/2013	2013-10	Monthly	0	NA	0	>15 years	36.8	3	1	NA
1732	691	130.12001	646.3110543	431.1538227	3160.601902	897.4900895	698.3083138	19442.33665	3463.577845	383	24/11/2013	2013-11	Monthly	0	NA	0	>15 years	36.4	3	1	NA
1733	691	79.04486589	464.8500183	302.3864005	2157.980423	589.0219826	385.3469659	16454.735	1283	206.5	21/12/2013	2013-12	Monthly	0	NA	0	>15 years	35.6	3	1	NA
1734	692	109.4467374	468.1867516	418.6209027	9778.55611	114.5591556	5957.975049	7164.039749	273	182	28/06/2013	2013-06	Monthly	0	NA	0	1-15 years	36.5	3	1	NA
1735	692	100.3261759	420.6076166	393.5457641	8250.410325	91.0196031	4745.51595	5957.691799	196	217	22/07/2013	2013-07	Monthly	0	NA	0	1-15 years	36	3	1	NA
1736	692	150.7932826	514.8570388	479.992805	10632.22761	160.0689572	6533.866509	7935.77462	301	215	24/08/2013	2013-08	Monthly	0	NA	0	1-15 years	35.4	3	1	NA
1737	692	212.8131005	614.6988552	578.6765705	10839.98376	150.6531362	6710.572577	8024.747668	335	374	22/09/2013	2013-09	Monthly	0	NA	0	1-15 years	35.6	3	1	NA
1738	692	2041.098454	752.3386325	383.5128692	12308.15653	277.7667198	18735.1314	11047.57479	3856.030085	324.5	27/10/2013	2013-10	Monthly	1	0	1	1-15 years	36	3	1	NA
1739	692	2152.863243	1700.150627	2242.83407	24676.37776	1165.018364	20804.23035	25093.50329	4079.630318	647	24/11/2013	2013-11	Monthly	0	NA	0	1-15 years	36.4	3	1	NA
1740	692	442.651249	609.7071946	715.6742121	15266.09608	277.7667198	12665.62325	18116.50741	630	237	21/12/2013	2013-12	Monthly	0	NA	0	1-15 years	35.9	3	1	NA
1741	693	872.533712	943.2803213	887.0199585	1969.001688	3027.416942	22605.03452	6147.664106	12555.13655	514	28/06/2013	2013-06	Monthly	NA	NA	1	>15 years	35.8	3	1	NA
1742	693	456.6361099	815.0755633	704.0660008	1865.34829	2438.409637	22850.23647	5211.087842	10694.71616	633.5	22/07/2013	2013-07	Monthly	0	NA	0	>15 years	35.7	3	1	NA
1743	693	541.1533127	972.6960269	741.3685074	3175.26053	4282.564812	24410.49291	7517.442173	12836.72299	536	24/08/2013	2013-08	Monthly	1	2	0	>15 years	36.5	3	1	NA
1744	693	330.7723619	684.1569816	594.4739626	2157.980423	2282.551448	21987.56755	5520.618598	8035.55167	668	22/09/2013	2013-09	Monthly	NA	NA	0	>15 years	36	3	1	NA
1745	693	248.0792714	547.3091965	431.1538227	1755.69812	1832.850216	19552.39307	4299.989702	6154.733062	358	27/10/2013	2013-10	Monthly	0	NA	0	>15 years	36	3	1	NA
1746	693	427.4503133	1742.080705	706.9683113	2194.934641	3790.924756	20298.43231	5373.244488	8171.448754	626	24/11/2013	2013-11	Monthly	0	NA	0	>15 years	35.2	3	1	NA
1747	693	352.6617094	852.4444483	545.3987698	2282.189565	2783.643555	19690.20671	5415.926479	8068.419539	453	21/12/2013	2013-12	Monthly	0	NA	0	>15 years	35.5	3	1	NA
1748	694	217.6773999	348.7409963	352.5710467	7135.29674	591.1626066	482.7482017	6280.561769	2924.023565	67	28/06/2013	2013-06	Monthly	0	NA	0	>15 years	35.9	3	1	NA
1749	694	445.0833987	479.8622945	547.4794485	8054.35236	711.4988228	708.9532576	8366.470102	3453.208361	366	22/07/2013	2013-07	Monthly	0	NA	0	>15 years	36.3	3	1	NA
1750	694	381.2394686	459.0098609	497.9228165	7663.824517	733.4168629	713.2112351	8176.431016	3614.703935	192	24/08/2013	2013-08	Monthly	0	NA	0	>15 years	35.4	3	1	NA
1751	694	373.334982	454.4204149	529.5819808	6156.836744	542.9882142	566.3110106	6899.402541	2674.693798	522	22/09/2013	2013-09	Monthly	0	NA	0	>15 years	35.7	3	1	NA
1752	694	5281.468293	2222.23491	1102.472509	26631.94163	13522.79197	13261.84882	24940.2416	31417.34541	488.5	27/10/2013	2013-10	Monthly	0	NA	1	>15 years	36	3	1	NA
1753	694	5842.002177	1366.780971	989.0327672	25134.6153	16798.81726	8287.088755	25345.17784	36662.60513	294	24/11/2013	2013-11	Monthly	0	0	1	>15 years	35.8	3	1	NA
1754	694	5497.660832	1876.047995	1317.962154	26154.26849	26475.72239	12169.98106	26174.67575	33647.84761	386	21/12/2013	2013-12	Monthly	0	NA	0	>15 years	35.2	3	1	NA
1755	695	886.5185729	490.6993759	342.5343594	3082.059855	1380.472119	2490.384604	4093.97488	142	300.5	24/07/2013	2013-07	Monthly	0	NA	0	>15 years	36.8	3	1	NA
1756	695	1064.065502	631.337259	386.0212218	4364.46421	1921.06736	3194.547637	5510.929191	211	331	24/08/2013	2013-08	Monthly	0	NA	0	>15 years	36.4	3	1	NA
1757	695	846.3881025	498.1992506	341.2797442	2981.634105	1218.374601	2422.789211	4082.651535	133	307	22/09/2013	2013-09	Monthly	0	NA	0	>15 years	36.2	3	1	NA
1758	695	974.0759628	593.8999557	367.6249244	3887.63925	1667.996521	2886.908761	4823.580207	169	296.5	27/10/2013	2013-10	Monthly	0	NA	0	>15 years	36.9	3	1	NA
1759	695	1933.636246	2408.015153	825.8238283	23920.71526	38966.76944	22524.22607	28561.67566	32333.57281	778	24/11/2013	2013-11	Monthly	0	NA	0	>15 years	36.6	3	1	NA
1760	695	1317.009073	678.7508905	562.0411308	16607.44045	16216.64524	14219.05433	8739.700706	7961.821737	416	21/12/2013	2013-12	Monthly	0	NA	0	>15 years	36.6	3	1	NA
1761	695	1344.370758	677.5033064	438.2541998	4586.277589	2538.542475	3122.162019	5922.942699	2922.796714	385	14/11/2013	2013-11	PCD	1	1	1	>15 years	39.5	3	1	NA
1762	696	66.6045849	1323.409864	52.61820348	41.00131162	8.782060891	129.0639101	36.89941293	26.83960609	191	02/07/2013	2013-07	Monthly	0	NA	1	1-15 years	36.6	3	1	NA
1763	696	118.4081509	288.2370984	149.1543995	68.16468056	19.51569087	238.271834	74.69881153	100.8798988	388.5	19/08/2013	2013-08	Monthly	0	NA	0	1-15 years	37.4	3	1	NA
1764	696	150.7853797	329.0730172	183.4907431	84.56520521	17.56412178	316.7029793	60.29904064	62.93424877	478	23/09/2013	2013-09	Monthly	0	NA	0	1-15 years	36.1	3	1	NA
1765	696	227.5656651	77.14304155	146.6042126	1726.116994	8671.364712	14269.45482	30430.26867	11181.30976	279	23/10/2013	2013-10	Monthly	0	NA	NA	1-15 years	36.2	3	1	NA
1766	696	81.40560377	528.8145419	74.88068602	47.15150836	11.22152225	181.6822734	40.49935565	36.09464268	234	19/11/2013	2013-11	Monthly	0	NA	0	1-15 years	36	3	1	NA
1767	696	105.4572594	581.1048404	95.07223631	65.60209859	13.66098361	276.991007	38.69938429	33.3181317	266	16/12/2013	2013-12	Monthly	0	NA	0	1-15 years	36.3	3	1	NA
1768	697	39.77773821	10.00809892	47.24575717	38.95124603	8.050222483	228.3438409	119.6980956	27.76510975	142.5	19/08/2013	2013-08	Monthly	0	NA	0	1-15 years	36.3	3	1	NA
1769	697	67.52964858	166.2344267	113.171676	96.60934049	12.68519906	539.0900244	197.9968498	35.16913902	219	16/09/2013	2013-09	Monthly	0	NA	1	1-15 years	36.2	3	1	NA
1770	697	51.80356604	221.3690665	81.00155957	58.68312725	10.24573771	375.2781385	161.0974369	31.46712438	220	23/10/2013	2013-10	Monthly	0	NA	0	1-15 years	36.3	3	1	NA
1771	697	50.41597052	130.1829961	71.28360588	59.96441824	9.269953163	355.4221524	128.6979524	33.3181317	186	19/11/2013	2013-11	Monthly	0	NA	0	1-15 years	36.6	3	1	NA
1772	697	85.10585849	868.6390569	150.2476195	126.5915496	15.12466042	703.8947096	225.896406	37.02014633	284	16/12/2013	2013-12	Monthly	0	NA	0	1-15 years	36	3	1	NA
1773	698	72.64111601	338.0034399	443.0233134	570.7900061	59.3527136	324.1494504	410.3074506	110.5453492	216	02/07/2013	2013-07	Monthly	NA	NA	0	1-15 years	35.2	3	1	NA
1774	698	100.9888686	311.3100249	352.1107783	240.3361291	39.90958328	200.1082607	247.9956747	72.86884438	508	19/08/2013	2013-08	Monthly	0	NA	0	1-15 years	36.4	3	1	NA
1775	698	111.6192758	372.0814216	440.6635353	473.1256071	59.3527136	321.1240555	355.9713196	93.57022063	361.5	23/09/2013	2013-09	Monthly	0	NA	0	1-15 years	35.6	3	1	NA
1776	698	67.76884604	282.7992148	275.1585918	277.1072977	41.95622858	226.472416	270.9840379	66.24440399	194	24/10/2013	2013-10	Monthly	0	NA	0	1-15 years	36.4	3	1	NA
1777	698	214.379879	235.964897	222.7459405	151.6934828	35.81629269	186.7100834	212.4682045	58.79190854	208.5	19/11/2013	2013-11	Monthly	0	NA	0	1-15 years	35.6	3	1	NA
1778	698	204.635339	436.1589305	419.9074542	462.2811742	57.3060683	381.1997536	358.0611708	88.60189033	284	18/12/2013	2013-12	Monthly	0	NA	0	1-15 years	36.2	3	1	NA
1779	699	86.01280534	280.6640267	364.3227495	883.5831066	72.81263865	2394.117527	2222.098249	172.8875838	193	02/07/2013	2013-07	Monthly	0	NA	0	1-15 years	36	3	1	NA
1780	699	101.7468551	344.6556883	412.5743897	848.8275743	62.61886924	2125.14434	2213.048588	204.1861981	356.5	20/08/2013	2013-08	Monthly	0	NA	0	1-15 years	36.2	3	1	NA
1781	699	136.3617646	559.5193529	551.023275	972.789597	75.72514419	2288.577572	2547.296089	231.0135817	659	23/09/2013	2013-09	Monthly	0	NA	1	1-15 years	36.4	3	1	NA
1782	699	135.3128279	667.2019993	441.5356918	1005.22868	80.09390251	2416.147712	2704.784646	233.9944021	392	24/10/2013	2013-10	Monthly	0	NA	0	1-15 years	35.4	3	1	NA
1783	699	125.8723981	474.4145889	333.2377062	872.577179	61.16261646	2064.177084	2400.681206	189.282096	294	20/12/2013	2013-12	Monthly	0	NA	0	1-15 years	36.6	3	1	NA
1784	700	501.9161873	1324.736434	677.8279255	15413.71106	19070.56639	15347.89016	27505.97166	20283.07111	546	02/07/2013	2013-07	Monthly	0	NA	0	>15 years	36.9	3	1	NA
1785	700	716.9482006	1577.811297	873.6834608	12630.30232	16308.77046	14522.73709	27747.02692	24361.58518	543	20/08/2013	2013-08	Monthly	0	NA	0	>15 years	36.3	3	1	NA
1786	700	350.3448413	871.3609975	689.6560011	8319.567549	10553.58952	9920.501617	26636.05826	15300.00928	620	16/09/2013	2013-09	Monthly	0	NA	0	>15 years	36.2	3	1	NA
1787	700	939.8472389	2831.650439	1423.595859	13948.886	13046.75298	15921.26225	26042.65844	19406.13015	414	23/10/2013	2013-10	Monthly	0	NA	1	>15 years	36.6	3	1	NA
1788	700	754.7099201	5171.516221	2135.527999	15364.83747	17472.44676	18837.11168	26959.57766	20565.24017	654.5	19/11/2013	2013-11	Monthly	0	NA	1	>15 years	35.8	3	1	NA
1789	701	113.094962	502.7813549	134.3763526	151.1417419	31.38607003	3333.464153	681.2445545	55	91	02/07/2013	2013-07	Monthly	1	0	0	1-15 years	37	3	1	NA
1790	701	107.0145877	418.1018848	132.8493486	119.3224278	36.09398054	2347.21011	323.9179865	47	108	20/08/2013	2013-08	Monthly	0	NA	0	1-15 years	36.6	3	1	NA
1791	701	137.4164592	539.405532	224.4658623	159.0965704	36.09398054	3121.097525	502.5812705	71	198.5	17/09/2013	2013-09	Monthly	0	NA	1	1-15 years	37.1	3	1	NA
1792	701	5798.51567	696.6318769	288.5868838	198.870713	84.74238909	23967.03496	10379.46758	8734.657225	258	23/10/2013	2013-10	Monthly	0	NA	0	1-15 years	37.5	3	1	NA
1793	701	3026.911135	759.4039182	328.3151757	254.5545126	81.60378209	21759.91578	5030.179096	4020.315098	427.5	19/11/2013	2013-11	Monthly	0	NA	0	1-15 years	36.8	3	1	NA
1794	701	167.8183307	539.8215119	224.8857313	167.0513989	36.09398054	3480.896625	502.5812705	223.5	194	21/09/2013	2013-09	PCD	1	1	1	1-15 years	36.3	3	1	NA
1795	701	8011.011562	706.1952502	260.1230155	198.870713	111.4205486	25208.75465	14187.68413	12132.36081	158	20/10/2013	2013-10	PCD	1	1	1	1-15 years	36	3	1	NA
1796	702	386.2140861	148.1947963	538.7449025	2228.086589	100.4940983	5076.679263	9950.834229	6321.078226	539.5	02/07/2013	2013-07	Monthly	1	2	0	>15 years	36.1	3	1	NA
1797	702	449.5809481	243.3305803	685.0718067	2312.677269	129.0670674	4637.365569	10284.36345	7595.18553	717.5	20/08/2013	2013-08	Monthly	0	NA	0	>15 years	35.6	3	1	NA
1798	702	473.6326038	219.6815381	715.4709248	2641.127316	123.5513978	4906.414182	11528.48511	8244.328047	790	17/09/2013	2013-09	Monthly	0	NA	0	>15 years	35.2	3	1	NA
1799	702	546.7126344	298.4310639	831.4240314	3176.4124	291.8938448	4902.442984	11764.41255	9362.4797	886	23/10/2013	2013-10	Monthly	0	NA	0	>15 years	36.2	3	1	NA
1800	702	4870.426469	10204.36943	1621.721805	17628.19798	7554.294321	14424.32169	18818.23608	25549.03956	812	25/11/2013	2013-11	Monthly	1	1	0	>15 years	36	3	1	NA
1801	702	9662.927046	691.7294513	598.8780883	6192.880495	3874.584867	9263.199682	10140.20257	12633.35186	761	05/11/2013	2013-11	PCD	1	1	1	>15 years	38.2	3	1	NA
1802	703	43.00640267	139.2781088	95.54334696	105.2981019	27.66880269	71.72618312	31.28548543	43.22189594	127	03/07/2013	2013-07	Monthly	NA	NA	1	1-15 years	35.8	3	1	NA
1803	703	33.56597282	138.9138974	81.36371782	69.8512161	21.84379159	54.8192971	28.35247118	37.26025512	92	21/08/2013	2013-08	Monthly	0	NA	0	1-15 years	35.9	3	1	NA
1804	703	61.88726238	232.986763	146.8845122	273.6708094	33.49381378	120.9098516	42.03987105	53.65476737	200.5	17/09/2013	2013-09	Monthly	0	NA	0	1-15 years	36.9	3	1	NA
1805	703	49.30002258	213.7261746	107.3067095	121.9789893	34.95006655	93.75636794	35.19617111	38.75066532	139	23/10/2013	2013-10	Monthly	0	NA	0	1-15 years	37	3	1	NA
1806	703	46.15321262	195.4856296	106.2372617	170.9790961	26.21254991	74.8001624	33.24082827	47.69312655	153	19/11/2013	2013-11	Monthly	0	NA	0	1-15 years	35.8	3	1	NA
1807	704	99.6489818	1738.22146	142.6049886	6872.117991	17810.70347	2392.580537	13625.08865	8581.292902	114	03/07/2013	2013-07	Monthly	0	NA	1	>15 years	36.6	3	1	NA
1808	704	110.1383483	1739.260913	198.2579836	7076.971302	18294.00158	2430.492948	13930.43577	9051.763535	189	21/08/2013	2013-08	Monthly	0	NA	0	>15 years	36.3	3	1	NA
1809	704	141.0819795	1995.940537	248.5937258	8129.268951	20538.50415	3020.696969	15455.77494	10632.5	264	17/09/2013	2013-09	Monthly	0	NA	0	>15 years	36	3	1	NA
1810	704	164.6830541	2281.247185	275.3745867	8759.442244	21991.59401	3245.097457	16036.23927	11720.97423	275	24/10/2013	2013-10	Monthly	0	NA	0	>15 years	36	3	1	NA
1811	704	2650.789706	2399.729797	201.4701313	8795.51022	22110.67228	8174.735557	15799.99774	25352.56294	233	15/11/2013	2013-11	PCD	1	1	1	>15 years	36	3	1	NA
1812	705	34.54882347	132.2074804	22.50890058	108.4675479	19.44313032	762.3995073	114.9418155	57.96385349	110	02/07/2013	2013-07	Monthly	0	NA	0	>15 years	36.7	3	1	NA
1813	705	57.58137245	193.7893397	102.8309575	264.6686499	27.6297115	1003.566698	154.6489882	88.60189033	216	24/08/2013	2013-08	Monthly	0	NA	0	>15 years	36.4	3	1	NA
1814	705	82.38565597	312.690374	211.5277473	417.8392968	34.79297004	1285.360621	205.8503424	113.4435418	390	16/09/2013	2013-09	Monthly	1	2	0	>15 years	35.2	3	1	NA
1815	705	61.12484152	194.2474588	131.2478618	191.6847681	25.58306621	888.169494	140.0200298	81.14939488	297.5	22/10/2013	2013-10	Monthly	0	NA	0	>15 years	36.2	3	1	NA
1816	705	71.75524875	280.0418928	151.3000279	353.9380556	33.76964739	1228.310317	203.4121827	112.6154868	289.5	18/11/2013	2013-11	Monthly	0	NA	0	>15 years	35.7	3	1	NA
1817	705	66.44004514	234.5886528	104.2272028	257.6387322	30.69967945	1067.099991	165.7948612	96.88244083	232.5	14/12/2013	2013-12	Monthly	0	NA	0	>15 years	36.6	3	1	NA
1818	706	147.085125	1413.561554	102.3040183	7.980656449	21.46725996	152.8910935	176.3971935	47.66343841	324	03/07/2013	2013-07	Monthly	0	NA	0	1-15 years	37	3	1	NA
1819	706	128.5838514	944.0986058	90.01653759	13.85037056	19.51569087	146.9342976	134.9978522	46.27518292	265	20/08/2013	2013-08	Monthly	0	NA	0	1-15 years	36.4	3	1	NA
1820	706	115.6329599	517.5184041	110.2717455	14.78661621	90.26007027	134.0279066	129.5979381	40.72216097	334.5	18/09/2013	2013-09	Monthly	0	NA	0	1-15 years	36.6	3	1	NA
1821	706	481.0331132	1348.912767	617.5999908	2129.436209	131.0729559	3627.688672	9034.812802	7012.51443	774	24/10/2013	2013-10	Monthly	0	NA	0	1-15 years	36.4	3	1	NA
1822	706	128.1213196	1001.89663	102.3040183	5.28729919	52.69236535	261.1062181	206.096721	140.6765561	291	27/11/2013	2013-11	Monthly	0	NA	1	1-15 years	36.6	3	1	NA
1823	706	3899.619414	3247.910906	300.6282374	622.742315	7.843704504	9038.941302	5680.299839	6229.44632	682	03/12/2013	2013-12	PCD	1	1	1	1-15 years	39.6	3	1	NA
1824	707	1356.289927	5154.044758	987.8998602	14947.36763	14527.5851	22131.93813	27946.83817	30083.29355	554.5	03/07/2013	2013-07	Monthly	0	NA	1	1-15 years	36.5	3	1	NA
1825	707	829.1844223	3371.948689	721.3827862	10945.81352	8866.946171	19540.72334	24528.56925	25169.6149	465	20/08/2013	2013-08	Monthly	0	NA	1	1-15 years	36.4	3	1	NA
1826	707	758.3811983	2443.830835	1458.758923	13019.25368	13104.37517	21414.1255	28540.85915	27286.16032	699	24/10/2013	2013-10	Monthly	0	NA	1	1-15 years	36.4	3	1	NA
1827	708	93.3553619	305.0296686	219.1396882	113.6385456	37.8625721	1094.848952	219.4872338	1216.919932	154	03/07/2013	2013-07	Monthly	0	NA	0	1-15 years	36	3	1	NA
1828	708	84.96386869	245.6621816	232.5272818	103.7342687	34.22194016	883.7690421	165.7153057	980.6899147	217	20/08/2013	2013-08	Monthly	0	NA	0	1-15 years	36.1	3	1	NA
1829	708	88.11067865	278.6341895	220.746148	93.82999178	33.49381378	854.5662389	165.22647	979.1995045	189	24/10/2013	2013-10	Monthly	0	NA	1	1-15 years	36.7	3	1	NA
1830	709	28.32128956	270.515781	70.26866539	61.51077239	32.03756101	39.9617306	40.08452821	147.5506103	64	04/07/2013	2013-07	Monthly	0	NA	0	1-15 years	36.3	3	1	NA
1831	709	30.41916287	227.9174947	88.76041944	45.87244043	26.21254991	40.98639036	28.35247118	146.0602001	110	21/08/2013	2013-08	Monthly	0	NA	0	1-15 years	37.1	3	1	NA
1832	709	63.98513568	441.3172362	151.16426	82.36188167	53.8813526	85.04675999	80.16905643	292.8656052	210	24/10/2013	2013-10	Monthly	0	NA	1	1-15 years	37	3	1	NA
1833	709	83.91493204	598.2848013	202.0055055	113.6385456	64.07512201	106.5646149	77.23604217	262.312196	303.5	20/11/2013	2013-11	Monthly	0	NA	0	1-15 years	35.7	3	1	NA
1834	709	100.6979185	362.9589343	103.0289811	87.57465899	30.58130823	66.60288433	43.99521389	347.2655777	130	18/12/2013	2013-12	Monthly	0	NA	0	1-15 years	38.2	3	1	NA
1835	710	68.45471226	120.9782573	115.7100507	2897.700694	11.95441814	5196.31158	9882.092524	663.586123	193.5	04/07/2013	2013-07	Monthly	0	NA	0	1-15 years	35.3	3	1	NA
1836	710	148.0101887	204.084071	190.4520919	2643.077022	86.3569321	4712.321917	9344.252669	464.6028365	403	21/08/2013	2013-08	Monthly	1	2	0	1-15 years	35.8	3	1	NA
1837	710	251.6173207	253.4816261	183.1245555	2347.363265	90.74796254	5034.485292	10346.66656	482.6501578	317	25/10/2013	2013-10	Monthly	0	NA	0	1-15 years	36	3	1	NA
1838	710	1937.305896	608.6580908	426.4366442	26561.63378	20656.44844	25046.6463	26013.81483	12313.68815	566	20/11/2013	2013-11	Monthly	0	NA	1	1-15 years	35.8	3	1	NA
1839	710	491.6713455	223.0568531	277.1737849	15492.61287	6435.032079	21591.93291	23285.5184	4491.760559	355	18/12/2013	2013-12	Monthly	0	NA	0	1-15 years	36.2	3	1	NA
1840	710	1425.911812	269.5737216	209.9090652	3219.634358	1927.072743	15638.41829	11757.22125	9957.303215	386	15/11/2013	2013-11	PCD	1	1	1	1-15 years	37.7	3	1	NA
1841	711	167.8298641	274.0674008	204.6824475	2142.813796	4980.748672	14582.43161	9883.045408	3774.170647	289.5	25/10/2013	2013-10	Monthly	0	NA	0	>15 years	36	3	0	NA
1842	711	191.955407	307.0607894	216.4622857	1880.751482	4427.052079	11910.45377	8631.713287	3614.176384	275	12/12/2013	2013-12	Monthly	1	0	0	>15 years	36.6	3	0	NA
1843	711	123.7745248	207.6453308	127.6283377	2621.90838	5724.965603	14951.93699	10298.21118	4239.292255	159	04/07/2013	2013-07	Monthly	0	NA	0	>15 years	35.8	3	0	NA
1844	711	11.53830316	11.57615811	24.30344818	11.46811011	10.19376941	13.32057687	9.776714198	14.90410205	10	22/08/2013	2013-08	Monthly	0	NA	1	>15 years	35.7	3	0	NA
1845	711	160.4873075	293.8603161	246.4514465	1680.204687	3775.571586	10830.0063	7441.218049	2935.18685	431	19/09/2013	2013-09	Monthly	0	NA	0	>15 years	36.3	3	0	NA
1846	712	74.93015802	176.7355743	56.56128366	3197.270635	4694.437949	9229.151612	11095.36087	1943.089414	122	04/07/2013	2013-07	Monthly	0	NA	0	>15 years	36.5	3	0	NA
1847	712	113.3203007	523.5994542	95.79491564	4082.027436	6316.416413	9508.662107	11975.87546	2514.768121	190	21/08/2013	2013-08	Monthly	0	NA	0	>15 years	36.1	3	0	NA
1848	712	114.7078962	403.0789755	125.5091711	3284.330934	4624.695533	9180.573061	9323.852548	2089.542457	297.5	19/09/2013	2013-09	Monthly	0	NA	0	>15 years	36	3	0	NA
1849	712	118.4081509	310.3366078	158.2697795	3054.033114	4791.244316	9170.487211	9258.674883	2188.960816	452	26/10/2013	2013-10	Monthly	0	NA	1	>15 years	36	3	0	NA
1850	712	169.7491851	833.7607696	153.5283007	4895.449066	7418.316545	9645.215611	12862.12388	2987.378056	305	25/11/2013	2013-11	Monthly	0	NA	0	>15 years	36.8	3	0	NA
1851	712	213.6897099	1284.545753	182.3922396	5458.622782	8449.37914	9897.532974	13991.16584	3607.289868	337	17/12/2013	2013-12	Monthly	0	NA	0	>15 years	36	3	0	NA
1852	713	61.97926651	15.07167044	83.52409137	10.31139704	28.29775176	7602.857103	3923.565239	133.2725268	205.5	04/07/2013	2013-07	Monthly	0	NA	0	>15 years	37.1	3	0	NA
1853	713	114.7078962	145.6798625	248.6282971	172.4068342	42.44662764	8965.970553	4850.157991	203.6108048	450	22/08/2013	2013-08	Monthly	0	NA	0	>15 years	36.2	3	0	NA
1854	713	66.6045849	12.42510056	110.9966215	6.80234763	23.90672131	5954.810251	3052.090897	107.3584244	272	19/09/2013	2013-09	Monthly	0	NA	0	>15 years	36.2	3	0	NA
1855	713	61.97926651	9.909958483	95.07223631	12.00741359	23.41882904	6268.038433	2999.609949	99.49164327	222.5	28/10/2013	2013-10	Monthly	0	NA	1	>15 years	36.1	3	0	NA
1856	713	86.03092217	40.10852825	166.6664811	16.71954665	30.00537471	5977.148236	3331.463855	129.5705122	353	24/11/2013	2013-11	Monthly	0	NA	0	>15 years	36.4	3	0	NA
1857	713	98.05675	97.99727542	191.1852851	50.7480852	33.66456675	6978.386338	3731.232663	164.7396512	382	18/12/2013	2013-12	Monthly	0	NA	0	>15 years	35.5	3	0	NA
1858	714	347.8239434	146.5181137	209.5414217	436.5332963	553.9049919	9326.428011	12038.29601	2637.349159	279.5	05/07/2013	2013-07	Monthly	1	0	1	>15 years	36.9	3	0	NA
1859	714	595.2784776	423.2805271	326.7959881	878.1863136	1362.879723	10312.22341	15382.78061	4474.502069	336	22/08/2013	2013-08	Monthly	1	2	0	>15 years	36.9	3	0	NA
1860	714	160.9610802	13.56617094	127.6885459	55.07382494	46.91058726	7785.035776	8571.390627	1654.664695	360	20/09/2013	2013-09	Monthly	1	2	0	>15 years	36.8	3	0	NA
1861	714	574.4645448	408.6624542	293.1725409	902.5567643	1392.123446	10530.96624	16434.11001	4402.382303	299	28/10/2013	2013-10	Monthly	0	NA	0	>15 years	35.7	3	0	NA
1862	714	348.2864752	178.416653	211.7475916	534.3088944	636.3392701	9307.485137	11612.62644	3071.68252	265.5	21/11/2013	2013-11	Monthly	0	NA	0	>15 years	36.2	3	0	NA
1863	714	242.366684	62.14969251	145.875757	308.9019312	350.3753156	8468.5781	9528.54112	2265.475211	228.5	18/12/2013	2013-12	Monthly	0	NA	0	>15 years	35	3	0	NA
1864	715	501.3845141	401.7909324	189.3524523	18.54170589	44.886089	2317.193586	1221.280569	1194.825223	350.5	05/07/2013	2013-07	Monthly	0	NA	1	1-15 years	36.3	3	1	NA
1865	715	249.7671934	53.82778032	150.2476195	138.8919431	29.2735363	1135.762409	524.6916521	733.9244011	315	22/08/2013	2013-08	Monthly	0	NA	0	1-15 years	36.3	3	1	NA
1866	715	168.3615896	32.63147948	147.3327434	116.3412217	27.80985949	782.3258549	412.6434348	445.1672597	314	20/09/2013	2013-09	Monthly	0	NA	0	1-15 years	37.1	3	1	NA
1867	715	182.2375448	47.17418082	256.0301458	138.3794267	26.83407494	539.5864241	225.896406	241.5564548	505	29/10/2013	2013-10	Monthly	0	NA	0	1-15 years	36.6	3	1	NA
1868	715	187.325395	11.04067652	276.8022193	120.1850947	24.39461359	469.0976732	198.8968355	201.2970457	560	21/11/2013	2013-11	Monthly	0	NA	1	1-15 years	35.1	3	1	NA
1869	715	208.1393278	9.235609249	123.3304507	16.20841249	18.78385246	4564.39482	64.79896904	154.0963591	253	18/12/2013	2013-12	Monthly	0	NA	0	1-15 years	37	3	1	NA
1870	716	490.0781685	858.6705918	2114.866212	5907.478713	6153.816916	15193.29894	10682.29902	9265.272039	326.5	07/07/2013	2013-07	Monthly	NA	NA	0	>15 years	36.3	3	0	NA
1871	716	745.4538891	1266.581449	2821.958382	7041.080238	7648.486704	15907.55402	12582.64723	13396.40334	570	22/08/2013	2013-08	Monthly	0	NA	0	>15 years	37.1	3	0	NA
1872	716	406.7770406	712.0161083	1876.272916	4677.565915	4698.938585	12737.4737	9530.389031	7639.829835	643	20/09/2013	2013-09	Monthly	0	NA	0	>15 years	35.8	3	0	NA
1873	716	541.1533127	1034.796954	2093.810008	5298.98246	5485.0598	13666.06675	10697.48562	10271.28319	541	31/10/2013	2013-10	Monthly	0	NA	0	>15 years	35.8	3	0	NA
1874	716	2527.323966	3363.724433	2755.519229	13227.82007	25188.79443	17003.82635	13775.56591	19605.11749	959	22/11/2013	2013-11	Monthly	0	NA	0	>15 years	35.7	3	0	NA
1875	716	1686.717469	2598.975731	4388.040282	17538.91802	21641.06983	19926.47228	19575.11393	22198.46685	755	20/12/2013	2013-12	Monthly	0	NA	0	>15 years	35.2	3	0	NA
1876	716	1287.823277	1331.743756	2396.01694	5972.614742	7442.515011	15145.69566	12230.63468	15133.64228	691	16/11/2013	2013-11	PCD	1	1	1	>15 years	36	3	0	NA
1877	717	64.75445754	8.703601729	96.15629656	103.0157954	17.07622951	188.6318686	50.39919814	41.64766463	256	22/08/2013	2013-08	Monthly	0	NA	0	1-15 years	36.6	3	0	NA
1878	717	78.16788089	62.14969251	121.878333	117.3662545	15.6125527	238.271834	41.84933417	39.79665731	309	23/09/2013	2013-09	Monthly	0	NA	0	1-15 years	36.2	3	0	NA
1879	717	74.00509434	73.80962976	120.7894345	3.721034397	15.12466042	263.0918167	50.39919814	48.12619024	269	31/10/2013	2013-10	Monthly	0	NA	0	1-15 years	36.6	3	0	NA
1880	717	50.87850236	11.36076319	63.01973765	84.56520521	12.68519906	137.9991039	31.49949884	30.54162073	170	22/11/2013	2013-11	Monthly	0	NA	1	1-15 years	36.7	3	0	NA
1881	717	3143.431928	138.1382986	197.4206771	7.086441471	54.15604216	10062.14187	2637.675844	800.5606645	274	13/12/2013	2013-12	Monthly	0	NA	0	1-15 years	35.6	3	0	NA
1882	717	71.2299033	41.35512517	103.7517181	136.3293611	16.10044497	195.5814637	44.99928406	38.87115365	265	26/11/2013	2013-11	PCD	1	1	1	1-15 years	39.1	3	0	NA
1883	718	308.9712689	213.7772165	81.361843	1730.346165	118.0364927	8696.921941	8262.135494	7268.437656	148	06/07/2013	2013-07	Monthly	1	0	0	>15 years	36	3	0	NA
1884	718	12.02582783	10.99287794	23.57852732	8.200262323	3.903138174	16.87758824	13.49978522	10.18054024	11	22/08/2013	2013-08	Monthly	0	NA	0	>15 years	36.2	3	0	NA
1885	718	1979.146498	10256.00901	3819.579639	9727.88845	2618.792756	22816.17868	17192.60675	15552.55526	653	23/09/2013	2013-09	Monthly	0	NA	1	>15 years	36.1	3	0	NA
1886	718	913.5003832	2778.210748	578.6492722	9643.523366	2738.872339	13692.67544	19515.23703	12447.69282	340	31/10/2013	2013-10	Monthly	0	NA	0	>15 years	36.4	3	0	NA
1887	718	1667.285108	7534.963515	643.8112334	6075.867833	1127.793003	21278.87631	7928.180667	8321.020368	313	17/09/2013	2013-09	PCD	1	1	1	>15 years	37.6	3	0	NA
1888	718	434.7799292	1301.651643	233.850559	6271.462276	1670.683298	9727.980942	16498.49956	7071.355052	183	11/11/2013	2013-11	PCD	1	1	1	>15 years	36.4	3	0	NA
1889	719	1091.418585	679.9728123	642.3510986	6775.517787	8481.897838	9242.431025	13852.88276	15308.43766	134	06/07/2013	2013-07	Monthly	0	NA	0	>15 years	36	3	0	NA
1890	719	819.2195241	595.2235413	523.1028798	5570.403407	6969.746947	7470.794302	11172.90336	12046.37428	127	26/08/2013	2013-08	Monthly	0	NA	0	>15 years	35.5	3	0	NA
1891	719	1233.355462	956.5220426	818.7681417	7401.15557	9664.421582	9784.93543	14503.07773	16554.46818	154	31/10/2013	2013-10	Monthly	1	0	0	>15 years	37.7	3	0	NA
1892	719	947.7142638	678.9510487	721.3827862	5740.72207	7191.581765	7831.474537	11696.45604	12691.74716	136.5	25/11/2013	2013-11	Monthly	0	NA	1	>15 years	35.3	3	0	NA
1893	719	683.9066962	474.9238949	518.8080735	4393.866104	5609.917429	6277.065683	9518.146891	10067.37557	122	12/12/2013	2013-12	Monthly	0	NA	0	>15 years	35.1	3	0	NA
1894	720	136.9094245	386.7762136	175.0734265	1130.581252	11.88417828	1167.531987	8084.139497	1359.06997	301	06/07/2013	2013-07	Monthly	0	NA	0	>15 years	36.8	3	1	NA
1895	720	113.7828325	208.7188702	149.5187873	912.0423437	15.30462766	993.7921076	6714.87889	1101.349353	295.5	26/08/2013	2013-08	Monthly	0	NA	1	>15 years	35.8	3	1	NA
1896	720	113.7828325	195.6620813	172.8793156	874.1275073	9.167320936	992.7993083	7578.323675	1001.394958	457.5	20/09/2013	2013-09	Monthly	0	NA	0	>15 years	36.9	3	1	NA
1897	720	114.7078962	220.103396	163.7447339	850.6929727	13.64298712	951.1017373	6199.42772	1119.396675	401	31/10/2013	2013-10	Monthly	0	NA	0	>15 years	36.9	3	1	NA
1898	720	160.0360165	463.809719	222.0529189	1353.85138	5.89153667	1279.221909	7929.146263	1456.420436	409	22/11/2013	2013-11	Monthly	0	NA	0	>15 years	37.1	3	1	NA
1899	720	106.3823231	242.4850891	124.7828584	919.7245145	14.07607439	986.3461128	6484.982251	1167.522865	245	20/12/2013	2013-12	Monthly	0	NA	0	>15 years	35.4	3	1	NA
1900	721	88.8061132	6.964565716	88.93386346	82.00262323	10.24573771	169.7686817	38.69938429	44.4241756	209	19/08/2013	2013-08	Monthly	0	NA	0	1-15 years	35.3	3	1	NA
1901	721	91.58130424	6.788022159	149.883194	76.36494288	11.22152225	160.8334879	47.6992411	43.49867194	425	23/09/2013	2013-09	Monthly	0	NA	1	1-15 years	36.6	3	1	NA
1902	721	95.28155896	11.64287068	83.52409137	94.81553311	12.19730679	190.6174672	38.69938429	50.90270121	169	22/10/2013	2013-10	Monthly	0	NA	0	1-15 years	36.7	3	1	NA
1903	721	55.50382075	90.81073078	39.73279764	48.17654115	8.294168619	97.29433221	30.59951316	31.92987621	124	18/11/2013	2013-11	Monthly	0	NA	0	1-15 years	37	3	1	NA
1904	721	82.33066745	13.1768504	64.81512991	99.94069706	12.19730679	169.7686817	36.89941293	45.34967926	153	16/12/2013	2013-12	Monthly	0	NA	0	1-15 years	36.6	3	1	NA
1905	722	312.531239	420.6076166	326.6423146	521.0223785	69.04935408	1254.506628	711.748042	97	163	31/10/2013	2013-10	Monthly	0	0	0	1-15 years	36.4	3	1	NA
1906	723	110.6628123	423.948387	221.1066573	159.0965704	31.38607003	435.9104489	66.09088962	407.5	177	06/07/2013	2013-07	Monthly	0	NA	0	1-15 years	35.9	3	0	NA
1907	723	99.11010108	377.9957297	199.2627619	112.958565	28.24746303	316.6870783	55.19678693	285	142	23/08/2013	2013-08	Monthly	0	NA	1	1-15 years	36.9	3	0	NA
1908	723	2763.817579	1497.347778	730.5950677	1575.075814	507.1120157	23431.33561	9648.788665	24219.39172	387	21/09/2013	2013-09	Monthly	0	NA	0	1-15 years	36.7	3	0	NA
1909	723	470.6209708	765.2220058	301.5500299	584.0893379	76.89587158	16933.66889	1994.347065	7293.288764	235	23/11/2013	2013-11	Monthly	0	NA	1	1-15 years	36.9	3	0	NA
1910	723	197.0041273	588.4921338	238.7369962	278.4189982	45.50980155	10354.83327	613.7011179	3181.337379	176	20/12/2013	2013-12	Monthly	0	NA	0	1-15 years	36.1	3	0	NA
1911	723	4429.882423	963.9971798	363.0253123	1029.425725	381.2073976	23984.68896	14966.34257	30035.50023	297	15/09/2013	2013-09	PCD	1	1	1	1-15 years	36.4	3	0	NA
1912	724	114.7078962	178.416653	88.57302575	121.4663857	15.6125527	147.9270969	41.39934133	46.27518292	219	06/07/2013	2013-07	Monthly	0	NA	0	1-15 years	36.5	3	0	NA
1913	724	821.919079	141.4895066	114.9847115	99.42818067	23.41882904	5615.272888	77.39876858	119.3899719	339.5	19/12/2013	2013-12	Monthly	0	NA	0	1-15 years	35.7	3	0	NA
1914	724	147.085125	197.7669858	137.1401212	113.7786397	16.10044497	203.5238582	57.59908359	62.93424877	385	23/08/2013	2013-08	Monthly	0	NA	0	1-15 years	35.9	3	0	NA
1915	724	122.1084057	7.882526968	145.1473765	85.590238	13.90492974	142.4667007	47.6992411	53.67921219	433	21/09/2013	2013-09	Monthly	0	NA	0	1-15 years	36.7	3	0	NA
1916	724	98.05675	11.64464914	46.17187863	54.07047969	9.513899299	88.35913844	34.19945588	33.3181317	157	31/10/2013	2013-10	Monthly	1	0	1	1-15 years	36.6	3	0	NA
1917	724	2232.410657	111.7806066	112.4465866	93.27798393	52.20447307	7303.528111	144.8976947	231.3759146	325	23/11/2013	2013-11	Monthly	0	NA	0	1-15 years	36.1	3	0	NA
1918	725	58.74045243	1074.208991	59.17361296	38.57455218	36.40631932	365.8035339	42.03987105	34.27943471	76.5	23/11/2013	2013-11	Monthly	0	NA	0	1-15 years	36	3	0	NA
1919	725	311.5341852	2320.014821	398.6328905	271.0644207	126.6939912	1611.277471	153.4944129	95.38625311	549.5	23/08/2013	2013-08	Monthly	0	NA	1	1-15 years	36.7	3	0	NA
1920	725	421.6725335	1503.185273	324.6638599	172.0216516	97.56893579	1120.465446	121.2312561	162.4547123	541	20/09/2013	2013-09	Monthly	0	NA	0	1-15 years	36	3	0	NA
1921	725	298.9469454	2117.556519	281.2669884	164.2024856	247.5629714	1075.380417	117.3205704	82.71776636	416.5	30/10/2013	2013-10	Monthly	0	NA	0	1-15 years	36.4	3	0	NA
1922	726	158.9139026	211.1924076	187.5520101	397.7464852	78.63764974	320.7185045	491.7687242	807.802331	186	06/07/2013	2013-07	Monthly	0	NA	0	>15 years	36.6	3	0	NA
1923	726	103.8447284	168.7447664	115.8626813	232.4898685	48.05634151	178.2907981	252.728062	447.1230614	135.5	23/08/2013	2013-08	Monthly	0	NA	0	>15 years	35.5	3	0	NA
1924	726	124.2989931	214.7397146	168.2856132	347.3944459	71.35638587	272.047166	441.9074818	753.4023585	182	21/09/2013	2013-09	Monthly	0	NA	0	>15 years	35.4	3	0	NA
1925	726	2714.032803	1242.66183	941.0153653	19982.96272	5099.094445	19307.05796	22371.42388	26388.34417	372.5	23/11/2013	2013-11	Monthly	0	NA	0	>15 years	36.7	3	0	NA
1926	726	663.9768998	408.743241	337.5248411	9701.987065	1212.690415	6155.131172	9285.409716	7929.548603	213	19/12/2013	2013-12	Monthly	0	NA	0	>15 years	36.2	3	0	NA
1927	727	83.91493204	143.3275507	154.3742217	108.4257683	30.58130823	3409.043018	275.7033404	41.73148573	173	07/07/2013	2013-07	Monthly	0	NA	1	1-15 years	36.3	3	0	NA
1928	727	77.62131214	158.0086759	152.2342328	105.2981019	30.58130823	2812.178708	214.1100409	47.69312655	188	23/08/2013	2013-08	Monthly	0	NA	0	1-15 years	37	3	0	NA
1929	727	147.9000677	388.9001474	333.2377062	227.2770912	52.42509983	5309.274541	430.1754247	73.03010003	417.5	21/09/2013	2013-09	Monthly	0	NA	0	1-15 years	36.6	3	0	NA
1930	727	130.0681447	372.1136915	282.8740468	202.7770378	50.96884705	4280.003813	352.9393826	80.48215106	365.5	30/10/2013	2013-10	Monthly	0	NA	0	1-15 years	36.2	3	0	NA
1931	727	89.68408362	222.3418768	206.8240866	121.9789893	34.95006655	2542.180862	201.4003125	59.61640819	302	22/11/2013	2013-11	Monthly	0	NA	0	1-15 years	37	3	0	NA
1932	727	134.7883596	414.3409172	283.9454286	220.5004807	52.42509983	4720.607509	352.9393826	77.50133065	328	19/12/2013	2013-12	Monthly	0	NA	0	1-15 years	35.6	3	0	NA
1933	728	33.56597282	101.5140019	68.6836579	44.82988496	23.30004437	47.13434891	40.08452821	26.82738369	68	07/07/2013	2013-07	Monthly	0	NA	0	1-15 years	35.8	3	1	NA
1934	728	59.78938908	148.8958974	130.8374075	98.00021364	33.49381378	105.5399552	71.37001365	47.69312655	179	23/08/2013	2013-08	Monthly	0	NA	1	1-15 years	36.2	3	1	NA
1935	728	75.52343884	298.4292291	183.2701167	121.9789893	36.40631932	136.2797479	72.34768507	53.65476737	280	21/09/2013	2013-09	Monthly	0	NA	0	1-15 years	36.2	3	1	NA
1936	728	22.02766966	221.835032	43.85187389	26.06388661	17.47503328	29.71513301	23.46411408	20.86574287	33	31/10/2013	2013-10	Monthly	0	NA	0	1-15 years	36.6	3	1	NA
1937	728	73.42556554	1029.470491	161.8646501	118.8513229	42.23133042	151.6496443	66.97049226	58.12599799	237	22/11/2013	2013-11	Monthly	0	NA	0	1-15 years	36.6	3	1	NA
1938	728	76.57237549	360.9247724	141.5351421	263.4749039	40.77507764	133.2057687	87.01275637	68.55886942	181.5	19/12/2013	2013-12	Monthly	0	NA	0	1-15 years	36.7	3	1	NA
1939	729	93.63776421	434.8041566	251.3204155	171.824296	36.09398054	320.4128086	62.45952206	35	208	07/07/2013	2013-07	Monthly	0	NA	0	1-15 years	36.3	3	0	NA
1940	729	88.77346477	627.1777333	247.1269625	169.4378475	36.09398054	331.0577524	65.36461611	39.5	225	23/08/2013	2013-08	Monthly	0	NA	1	1-15 years	37.6	3	0	NA
1941	729	99.71813851	524.8456093	277.2929591	198.0752301	48.64840855	337.4447187	82.7951804	41	284	21/09/2013	2013-09	Monthly	0	NA	0	1-15 years	37.1	3	0	NA
1942	729	1949.33709	1300.405605	384.3489958	810.7825581	263.6429883	22768.28409	12643.1849	8770.53823	304	31/10/2013	2013-10	Monthly	0	NA	0	1-15 years	36.7	3	0	NA
1943	729	2159.835287	567.2766443	313.2595267	541.7188602	861.6900633	6652.025386	466.2675949	794	343.5	23/11/2013	2013-11	Monthly	0	NA	0	1-15 years	37	3	0	NA
1944	729	800.1772578	560.6207983	702.40746	259.3274097	188.3164202	12743.79672	3576.166649	183	223	19/12/2013	2013-12	Monthly	1	0	1	1-15 years	35.9	3	0	NA
1945	729	135.5923469	490.6993759	246.2881451	165.4604332	65.91074707	424.7332579	101.6782917	38	213	15/11/2013	2013-11	PCD	1	1	1	1-15 years	38.4	3	0	NA
1946	730	43.00640267	80.1426331	67.62698624	531.4543791	381.1769713	190.5867152	2958.256894	442.6518308	51	31/10/2013	2013-10	Monthly	0	NA	0	1-15 years	36.9	3	0	NA
1947	731	66.44004514	352.7369494	17.41228086	47.67146926	17.39648502	59.2112996	19.50527779	22.35748635	116.5	02/07/2013	2013-07	Monthly	0	NA	0	1-15 years	36.6	3	1	NA
1948	731	62.89657606	163.5673272	61.87845342	45.4013993	17.39648502	50.13511499	20.89851192	20.70137625	94	19/08/2013	2013-08	Monthly	0	NA	0	1-15 years	36.3	3	1	NA
1949	731	90.35846138	266.7191212	107.9511882	71.88554888	32.74632475	86.43985343	33.43761907	31.46609189	330	21/09/2013	2013-09	Monthly	0	NA	0	1-15 years	35.2	3	1	NA
1950	731	83.71445687	339.8448885	56.82415798	67.34540895	24.55974356	76.93146955	33.7859276	33.12220199	188	22/10/2013	2013-10	Monthly	0	NA	0	1-15 years	36.7	3	1	NA
1951	731	67.3259124	164.4827598	38.26873483	57.50843911	20.46645297	64.82989007	27.16806549	27.32581664	168.5	18/11/2013	2013-11	Monthly	0	NA	0	1-15 years	36	3	1	NA
1952	731	65.55417787	153.4990766	17.87556926	65.83202898	20.46645297	63.101093	27.16806549	24.01359645	113	16/12/2013	2013-12	Monthly	0	NA	0	1-15 years	36.2	3	1	NA
1953	732	60.83832573	145.8585646	67.62698624	211.6387592	66.98762756	89.14539903	624.7320373	62.5972286	71.5	07/07/2013	2013-07	Monthly	0	NA	0	1-15 years	36.3	3	0	NA
1954	732	90.20855195	175.7314835	124.4193792	213.7238702	66.98762756	138.3290675	579.759152	59.61640819	136.5	26/08/2013	2013-08	Monthly	0	NA	0	1-15 years	35.5	3	0	NA
1955	732	92.30642525	167.1226659	126.5586726	213.2025924	66.25950117	142.4277065	621.3101873	64.08763881	148	23/09/2013	2013-09	Monthly	0	NA	1	1-15 years	35.6	3	0	NA
1956	732	127.9702714	275.5896108	164.0049089	346.2369406	107.7627052	225.425147	999.1801911	96.87666331	181	30/10/2013	2013-10	Monthly	0	NA	0	1-15 years	36	3	0	NA
1957	732	76.57237549	174.2121964	101.9595748	216.8515366	65.53137478	130.1317894	596.3795661	70.04927962	116	19/12/2013	2013-12	Monthly	0	NA	0	1-15 years	35.6	3	0	NA
1958	733	689.1513794	523.8340852	1095.745437	7657.835571	18583.58182	9379.735433	16362.98573	25090.62855	333	02/07/2013	2013-07	Monthly	0	NA	1	>15 years	36.3	3	1	NA
1959	733	709.0811758	692.2353199	1102.758479	6749.91376	17656.29051	8378.130519	15325.94663	24140.16364	515	26/08/2013	2013-08	Monthly	0	NA	0	>15 years	36.2	3	1	NA
1960	733	805.5833476	652.391184	1070.933042	6419.427143	16763.23887	8085.590158	14839.90611	23190.41036	687	23/09/2013	2013-09	Monthly	0	NA	0	>15 years	36.6	3	1	NA
1961	733	581.1109044	588.5913038	889.8397589	5805.255485	14162.52789	7358.081729	13328.25113	21563.00395	542.5	18/11/2013	2013-11	Monthly	0	NA	0	>15 years	36.1	3	1	NA
1962	733	570.6215379	507.5269482	759.5740323	5679.100576	14442.99341	7387.796862	13386.27707	21535.81547	413.5	16/12/2013	2013-12	Monthly	0	NA	0	>15 years	36.2	3	1	NA
1963	734	368.0067295	1546.266943	492.3479832	12557.32827	14104.49832	9739.837793	13927.19509	13320.22998	117	29/06/2013	2013-06	Monthly	0	NA	1	1-15 years	36.5	4	1	NA
1964	734	190.3483084	897.2081355	361.2022264	8739.062828	9061.543256	7364.555827	10210.08283	8476.584493	116	26/07/2013	2013-07	Monthly	0	NA	0	1-15 years	36.5	4	1	NA
1965	734	201.8485187	966.26295	347.608169	9462.437168	9570.96569	7410.643387	10950.73361	7947.318654	131.5	22/08/2013	2013-08	Monthly	0	NA	0	1-15 years	36.4	4	1	NA
1966	734	264.9013958	1191.192326	411.2439128	10101.54509	10481.63379	8171.679002	12870.97635	8798.450944	182	20/09/2013	2013-09	Monthly	0	NA	0	1-15 years	36.6	4	1	NA
1967	734	466.3533555	1957.642376	960.1986394	9997.115698	10372.30028	10048.8608	12707.52429	9375.204159	160.5	27/10/2013	2013-10	Monthly	0	NA	0	1-15 years	36.4	4	1	NA
1968	734	188.7620725	940.3586723	685.8842653	6313.305801	6508.837477	6838.094078	7977.159328	6226.614125	131	20/11/2013	2013-11	Monthly	0	NA	0	1-15 years	36.2	4	1	NA
1969	734	154.6580006	838.4660095	629.1459811	6380.939976	6282.324014	6841.048409	8472.725983	5571.218387	111	11/12/2013	2013-12	Monthly	0	NA	0	1-15 years	36.7	4	1	NA
1970	735	65.83215617	6.909700642	13.59817143	6.561399692	13.26968777	128.5210877	42.73342713	30.76814141	272.5	29/06/2013	2013-06	Monthly	0	NA	0	1-15 years	36.5	4	0	NA
1971	735	124.978234	16.17667675	12.52885392	14.74793415	9.831485232	239.352475	885.6847398	10102.8655	347	26/07/2013	2013-07	Monthly	0	NA	1	1-15 years	36.6	4	0	NA
1972	735	56.06019549	13.45551675	13.13138468	7.447636871	11.68996303	105.0551587	44.11192478	30.76814141	266	22/08/2013	2013-08	Monthly	0	NA	0	1-15 years	36.1	4	0	NA
1973	735	41.1450976	9.315382514	7.630148135	91.28327566	8.530513564	73.6469154	35.15169006	27.0893419	215	20/09/2013	2013-09	Monthly	0	NA	0	1-15 years	36.2	4	0	NA
1974	735	52.45999945	7.815743967	10.15070283	10.97057155	10.1102383	96.02980145	47.55816891	28.7615235	248	27/10/2013	2013-10	Monthly	0	NA	0	1-15 years	36.6	4	0	NA
1975	735	61.71764641	14.52773864	8.699925825	6.193920947	11.53199056	96.75183003	41.35492948	29.43039613	247	25/11/2013	2013-11	Monthly	0	NA	0	1-15 years	36.2	4	0	NA
1976	736	108.5201949	13.9219217	9.428521744	9.727671396	10.63678122	1544.780152	2671.539675	282.9331265	194	29/06/2013	2013-06	Monthly	0	NA	1	1-15 years	36.5	4	1	NA
1977	736	150.4367631	13.24178186	9.39275433	7.325210641	8.489195773	1351.637506	2109.525915	228.08557	219	26/07/2013	2013-07	Monthly	0	NA	0	1-15 years	36.3	4	1	NA
1978	736	169.7235276	12.26570101	7.809640107	9.139110133	12.10868271	1622.398225	2784.480757	303.333742	249	22/08/2013	2013-08	Monthly	0	NA	0	1-15 years	36.4	4	1	NA
1979	736	146.3222534	11.34697641	12.70784638	15.72756703	7.053469647	1551.639423	2637.92672	293.6350887	261.5	20/09/2013	2013-09	Monthly	0	NA	1	1-15 years	36.2	4	1	NA
1980	736	165.0947041	10.26760071	10.24464532	13.55759784	7.039463822	1617.705039	2786.130056	304.3370509	263	27/10/2013	2013-10	Monthly	0	NA	0	1-15 years	36.1	4	1	NA
1981	736	91.03352845	10.77173148	11.94502368	128.1850254	11.68421819	1030.695801	1525.78874	204.006155	158	12/12/2013	2013-12	Monthly	0	NA	0	1-15 years	36.8	4	1	NA
1982	737	88.82921058	270.8635633	254.6667783	195.2703276	44.54891309	391.7442645	68.63745921	80.00253986	282.5	29/06/2013	2013-06	Monthly	0	NA	1	1-15 years	36.7	4	0	NA
1983	737	81.69114902	248.9696061	243.8006697	159.5288837	40.37245249	349.7927671	65.36900877	70.20631049	285.5	25/07/2013	2013-07	Monthly	0	NA	0	1-15 years	36.1	4	0	NA
1984	737	39.65589758	147.7731846	114.5993407	64.5089475	25.05876362	122.9001614	43.03459744	47.34844196	145	23/08/2013	2013-08	Monthly	0	NA	0	1-15 years	36.5	4	0	NA
1985	737	69.00126179	219.6151343	211.2068505	150.3755871	37.58814542	272.3893001	57.74262441	70.20631049	252	21/09/2013	2013-09	Monthly	0	NA	0	1-15 years	37	4	0	NA
1986	737	38.06966168	130.5736138	116.7687929	108.0960742	34.80383835	137.0809493	45.75830614	52.24655664	151	25/10/2013	2013-10	Monthly	0	NA	0	1-15 years	36	4	0	NA
1987	737	99.9328619	391.2131159	305.7488003	224.0378312	47.33322016	458.5121407	79.532294	89.79876923	346	19/11/2013	2013-11	Monthly	0	NA	0	1-15 years	36.3	4	0	NA
1988	737	73.7599695	237.2257807	207.9478201	153.8625572	37.58814542	316.113396	52.29520702	58.77737622	234.5	11/12/2013	2013-12	Monthly	0	NA	0	1-15 years	36.7	4	0	NA
1989	738	42.03525144	371.9382644	109.7182737	73.22637284	34.80383835	196.1675654	40.31088874	44.08303217	130	29/06/2013	2013-06	Monthly	0	NA	1	1-15 years	37.1	4	1	NA
1990	738	72.1737336	873.4886181	181.8825837	115.0700145	55.68614137	357.4740272	55.56365745	66.9409007	211	25/07/2013	2013-07	Monthly	0	NA	0	1-15 years	36	4	1	NA
1991	738	43.62148734	283.1501991	124.3623229	77.58508551	33.41168482	189.0771714	46.84778962	48.98114685	149	22/08/2013	2013-08	Monthly	0	NA	1	1-15 years	36.5	4	1	NA
1992	738	39.65589758	155.0885482	114.5993407	74.09811538	30.62737775	150.0800048	45.75830614	50.61385175	146	21/09/2013	2013-09	Monthly	0	NA	0	1-15 years	36.8	4	1	NA
1993	738	114.208985	494.0769599	396.0111378	171.9134767	50.11752723	567.2315143	102.4114471	101.2277035	417	25/10/2013	2013-10	Monthly	0	NA	0	1-15 years	36.1	4	1	NA
1994	738	56.31137456	282.6159251	180.7968051	116.8134995	47.33322016	244.6185905	124.2011167	73.47172028	212	19/11/2013	2013-11	Monthly	0	NA	0	1-15 years	36.7	4	1	NA
1995	738	42.03525144	178.0119798	107.0066865	81.07205565	33.41168482	184.3502421	54.47417397	47.34844196	137.5	11/12/2013	2013-12	Monthly	0	NA	0	1-15 years	36	4	1	NA
1996	739	211.3829389	9.430916004	10.56915553	1695.086856	3655.418138	4955.282161	4392.820338	6567.217956	206	21/07/2013	2013-07	Monthly	0	NA	1	1-15 years	36.3	4	1	NA
1997	739	25.20137228	10.64612162	8.687714736	51.95377923	6.95078883	75.81300115	23.43446004	19.39730654	120	23/08/2013	2013-08	Monthly	0	NA	0	1-15 years	36.1	4	1	NA
1998	739	32.40176436	14.20503096	12.17855991	11.29295954	63.50493431	163.1784596	139.572887	107.6884949	174	21/09/2013	2013-09	Monthly	0	NA	0	1-15 years	36.4	4	1	NA
1999	739	34.97333296	12.29040569	3.72698242	80.60119021	9.478348405	116.2466018	31.36082153	25.4171603	179.5	26/10/2013	2013-10	Monthly	0	NA	0	1-15 years	36.6	4	1	NA
[truncated: 3,573 more rows]
